# Supplementary material for: Screening of Early Diagnostic Biomarkers and Prognostic Biomarkers for Liver Cancer Based on GEO and TCGA Databases and Studies on Pathways and Biological Functions Affecting the Survival Time of Liver Cancer
Source: Research Square preprint supplement (doi:10.21203/rs.3.rs-86072/v1), 2020-10-08
Supplement: Supplementary file 1 [file 2a4f9528cc827d06afadd344.xlsx]

## Sheet: degree_9+DESeq2=102
SUPPLEMENT TABLE 3 Parameter values of the common differentially expressed genes
Number	Name	Betweenness	BottleNeck	Closeness	ClusteringCoefficient	Degree	DMNC	EcCentricity	EPC	MCC	MNC	Radiality	Stress
1	ESR1	2780.98	58	38.7833	0.16667	13	0.20362	0.15823	29.267	28	11	8.41601	5698
2	SPP1	1519.02	30	35.65	0.22727	12	0.25452	0.18987	28.523	35	11	8.17225	3920
3	AURKA	967.429	11	32.0262	0.4	11	0.64146	0.13562	24.932	5045	8	7.80021	1918
4	CXCL12	1415	15	32.7333	0.11111	9	0.2842	0.15823	24.104	11	4	7.99264	2458
5	FOS	617.741	17	33.3	0.30556	9	0.32073	0.15823	27.171	29	8	8.03113	1918
6	NQO1	1353	11	31.5595	0.17857	8	0.30898	0.13562	22.39	12	3	7.85152	2882
7	NUSAP1	146	2	25.7845	0.75	8	0.76834	0.11867	23.933	5041	7	7.05611	338
8	TOP2A	332.073	3	30.2762	0.78571	8	0.64146	0.13562	24.535	5042	8	7.73606	938
9	UBE2C	146.376	1	27.2512	0.75	8	0.76834	0.11867	24.358	5041	7	7.22289	264
10	AFP	281.746	4	30.05	0.33333	7	0.33284	0.15823	26.154	17	6	7.78738	770
11	DCN	303.6	3	28.55	0.28571	7	0.28529	0.15823	24.753	13	6	7.53079	782
12	EGR1	228.024	3	30.2167	0.42857	7	0.42794	0.15823	25.634	25	6	7.80021	602
13	GMNN	0	1	25.2845	1	7	0.76834	0.11867	24.182	5040	7	7.04328	0
14	PTTG1	0	1	25.2845	1	7	0.76834	0.11867	23.945	5040	7	7.04328	0
15	RRM2	0	1	25.2845	1	7	0.76834	0.11867	23.637	5040	7	7.04328	0
16	SOCS3	631.698	6	31.0595	0.09524	7	0.30779	0.13562	25.026	7	2	7.82586	1378
17	UBE2T	0	1	25.2845	1	7	0.76834	0.11867	24.048	5040	7	7.04328	0
18	CYP1A2	577	5	29.3929	0.2	6	0.30898	0.13562	19.567	7	3	7.73606	822
19	GPC3	44.4762	2	26.7	0.53333	6	0.38039	0.15823	24.616	20	6	7.36401	138
20	FOSB	35.4667	1	27.5595	0.7	5	0.45378	0.13562	24.251	18	5	7.58211	166
21	PCK1	570	5	24.2179	0.1	5	0.30779	0.11867	10.699	5	2	7.01762	1074
22	SPARCL1	18.4333	1	26.5333	0.6	5	0.38896	0.15823	24.879	14	5	7.38967	62
23	COL2A1	188.033	4	26.2	0.33333	4	0.30898	0.15823	19.798	5	3	7.4025	480
24	GHR	72.6556	1	26.5	0.33333	4	0.30779	0.15823	22.611	4	2	7.46664	222
25	IL1RN	310.948	3	24.6262	0	4	0	0.13562	14.814	4	1	7.17157	582
26	LCN2	835.1	7	26.0833	0	4	0	0.15823	14.99	4	1	7.41533	2250
27	MDK	24.9762	2	25.3667	0.5	4	0.46346	0.15823	21.614	7	3	7.31269	68
28	MT1F	72	2	23.2179	0.66667	4	0.37893	0.11867	14.282	8	4	6.9663	268
29	MT1G	72	1	23.2179	0.66667	4	0.37893	0.11867	14.57	8	4	6.9663	268
30	REG1A	291	3	18.0369	0.16667	4	0.30779	0.11867	6.743	4	2	5.73469	1000
31	CYP2C8	146	2	21.8012	0.33333	3	0.30779	0.11867	9.815	3	2	6.83801	204
32	MT1X	0	1	22.7179	1	3	0.46346	0.11867	14.459	6	3	6.95347	0
33	NPY1R	290	3	23.4595	0	3	0	0.13562	10.599	3	1	7.10742	458
34	NR4A3	0	1	23.5762	1	3	0.46346	0.13562	19.98	6	3	7.13308	0
35	PDZK1IP1	345	5	20.7095	0.33333	3	0.30779	0.13562	8.322	3	2	6.58142	984
36	STAB2	290	3	18.9774	0	3	0	0.11867	6.383	3	1	6.24786	458
37	ZFP36	0	1	23.5762	1	3	0.46346	0.13562	20.428	6	3	7.13308	0
38	CCL23	0	1	22.6262	1	2	0.30779	0.13562	12.186	2	2	7.06894	0
39	COL15A1	0	1	21.0024	1	2	0.30779	0.13562	13.938	2	2	6.68406	0
40	CXCL14	0	1	22.6262	1	2	0.30779	0.13562	11.868	2	2	7.06894	0
41	CYP17A1	0	1	25.9762	1	2	0.30779	0.13562	15.457	2	2	7.54362	0
42	CYP4A11	0	1	21.3012	1	2	0.30779	0.11867	9.53	2	2	6.82518	0
43	DLK1	0	1	21.7262	1	2	0.30779	0.13562	17.273	2	2	6.90216	0
44	FBP1	0	1	18.2671	1	2	0.30779	0.10549	5.951	2	2	6.09391	0
45	GNAZ	0	1	26.9095	1	2	0.30779	0.13562	17.865	2	2	7.65908	0
46	GYS2	0	1	18.2671	1	2	0.30779	0.10549	5.73	2	2	6.09391	0
47	HAMP	80.5	1	23.9833	0	2	0	0.15823	13.866	2	1	7.2742	380
48	IGF2BP2	146	2	17.7409	0	2	0	0.10549	5.055	2	1	6.00411	202
49	IGF2BP3	36.2222	1	24.0762	0	2	0	0.13562	16.181	2	1	7.17157	118
50	LYVE1	426	4	23.2929	0	2	0	0.13562	10.938	2	1	7.13308	678
51	MT1M	0	1	17.8504	1	2	0.30779	0.10549	9.076	2	2	6.04259	0
52	MUC13	0	1	16.8702	1	2	0.30779	0.11867	5.359	2	2	5.6962	0
53	NNMT	288	3	22.4345	0	2	0	0.11867	10.305	2	1	6.91498	400
54	REG3A	207	1	20.2095	0	2	0	0.13562	8.318	2	1	6.56859	738
55	ROBO1	10.5	1	23.2929	0	2	0	0.13562	14.499	2	1	7.13308	22
56	SOCS2	0	1	22.7929	1	2	0.30779	0.13562	15.948	2	2	7.06894	0
57	SPINK1	146	2	14.704	0	2	0	0.10549	3.629	2	1	4.82381	500
58	ADH4	0	1	17.6274	0	1	0	0.11867	4.671	1	1	6.17089	0
59	AKR1B10	0	1	21.5512	0	1	0	0.11867	9.213	1	1	6.91498	0
60	APOF	0	1	1	0	1	0	0.02532	1.394	1	1	0.07595	0
61	CETP	0	1	1	0	1	0	0.02532	1.394	1	1	0.07595	0
62	CLEC4M	0	1	14.9087	0	1	0	0.10549	3.117	1	1	5.31132	0
63	DUSP9	0	1	14.254	0	1	0	0.09494	2.621	1	1	5.06757	0
64	ECM1	0	1	18.1464	0	1	0	0.11867	6.593	1	1	6.23503	0
65	FCN2	0	1	1	0	1	0	0.02532	1.361	1	1	0.07595	0
66	FCN3	0	1	1	0	1	0	0.02532	1.361	1	1	0.07595	0
67	HAO2	0	1	17.7671	0	1	0	0.10549	4.779	1	1	6.08108	0
68	HSD17B13	0	1	12.0873	0	1	0	0.09494	2.21	1	1	3.88727	0
69	IL1RAP	0	1	18.1464	0	1	0	0.11867	6.433	1	1	6.23503	0
70	LIFR	0	1	21.3679	0	1	0	0.11867	9.439	1	1	6.88933	0
71	MARCO	0	1	14.9087	0	1	0	0.10549	3.381	1	1	5.31132	0
72	NAT2	0	1	20.6345	0	1	0	0.11867	8.436	1	1	6.79952	0
73	PHLDA1	0	1	21.5179	0	1	0	0.11867	10.264	1	1	6.86367	0
74	RCAN1	0	1	20.9762	0	1	0	0.13562	10.223	1	1	6.86367	0
75	S100P	0	1	18.2909	0	1	0	0.10549	9.417	1	1	6.11957	0
76	SLC22A1	0	1	16.6671	0	1	0	0.10549	4.342	1	1	5.90147	0
77	SULT1C2	0	1	17.7671	0	1	0	0.10549	5.232	1	1	6.08108	0
78	THBS4	0	1	19.9857	0	1	0	0.13562	10.133	1	1	6.59425	0
79	VIPR1	0	1	17.6274	0	1	0	0.11867	5.094	1	1	6.17089	0
