# Supplementary material for: Screening of Early Diagnostic Biomarkers and Prognostic Biomarkers for Liver Cancer Based on GEO and TCGA Databases and Studies on Pathways and Biological Functions Affecting the Survival Time of Liver Cancer
Source: Research Square preprint supplement (doi:10.21203/rs.3.rs-86072/v1), 2020-10-08
Supplement: Supplementary file 2 [file 808713d79393b9ae48329e43.xlsx]

## Sheet: diffLab_qudiaowuxiaoshuju
SUPPLEMENT TABLE 2 The differentially expressed genes of TCGA LIHC (p>0.05 |LogFC|>2)
	gene_id	gene	entrez	baseMean	logFC	lfcSE	stat	P.Value	adj.P.Val
1	ENSG00000004846	ABCB5	340273	22.7907	-6.01059	0.496736	-9.2695	1.87016e-20	4.02994e-19
2	ENSG00000004848	ARX	170302	2.20621	-2.99791	0.55529	-3.96941	7.20504e-05	0.000219902
3	ENSG00000005073	HOXA11	3207	11.0928	-4.94049	0.522915	-8.99384	2.38739e-19	4.61528e-18
4	ENSG00000005187	ACSM3	6296	1576.43	2.04793	0.206851	9.89974	4.17366e-23	1.15973e-21
5	ENSG00000006016	CRLF1	9244	60.6096	-2.63574	0.205822	-7.42304	1.14463e-13	1.16872e-12
6	ENSG00000006071	ABCC8	6833	16.5221	-2.56776	0.3305	-5.53762	3.06612e-08	1.56122e-07
7	ENSG00000006118	TMEM132A	54972	590.144	-2.45465	0.24308	-10.8276	2.54727e-27	1.05882e-25
8	ENSG00000006283	CACNA1G	8913	5.009	-2.07148	0.37901	-5.09348	3.51543e-07	1.5428e-06
9	ENSG00000006377	DLX6	1750	15.8615	-5.06476	0.618524	-7.98474	1.4082e-15	1.79916e-14
10	ENSG00000006606	CCL26	10344	15.441	-3.03277	0.360684	-8.02905	9.8234e-16	1.27316e-14
11	ENSG00000006611	USH1C	10083	617.649	-2.52139	0.421184	-5.99856	1.99076e-09	1.19366e-08
12	ENSG00000006659	LGALS14	56891	12.5594	-4.48893	0.827285	-7.78732	6.84429e-15	8.08409e-14
13	ENSG00000006788	MYH13	8735	4.78114	-3.38476	0.543394	-5.94672	2.73565e-09	1.60524e-08
14	ENSG00000007038	PRSS21	10942	14.0837	-2.48086	0.400159	-3.39328	0.000690618	0.0017615
15	ENSG00000007306	CEACAM7	1087	29.6376	-4.79624	0.700154	-3.46583	0.000528607	0.00137719
16	ENSG00000007314	SCN4A	6329	79.2197	-2.09124	0.192865	-10.8382	2.26996e-27	9.49076e-26
17	ENSG00000007350	TKTL1	8277	22.2049	-3.77288	0.378598	-3.81682	0.00013518	0.000394084
18	ENSG00000007968	E2F2	1870	115.068	-2.95736	0.196996	-14.9993	7.41688e-51	1.60501e-48
19	ENSG00000008300	CELSR3	1951	289.501	-3.42953	0.202398	-16.9363	2.43042e-64	9.97478e-62
20	ENSG00000008438	PGLYRP1	8993	2.61059	2.07264	0.223712	9.27556	1.76691e-20	3.82128e-19
21	ENSG00000008735	MAPK8IP2	23542	441.458	-3.20442	0.252769	-12.677	7.93095e-37	7.18737e-35
22	ENSG00000010282	HHATL	57467	5.08203	-5.86796	0.336071	-2.50682	0.0121822	0.023942
23	ENSG00000010932	FMO1	2326	219.598	-2.12996	0.332864	-6.40152	1.5384e-10	1.06413e-09
24	ENSG00000011083	SLC6A7	6534	8.03479	-2.96267	0.393444	-7.05142	1.77095e-12	1.56596e-11
25	ENSG00000011332	DPF1	8193	6.68918	-2.42092	0.275744	-7.63728	2.21855e-14	2.46778e-13
26	ENSG00000011426	ANLN	54443	491.251	-3.58189	0.202606	-17.6741	6.64003e-70	3.95148e-67
27	ENSG00000011465	DCN	1634	4729.7	2.25546	0.289881	7.77785	7.37671e-15	8.69857e-14
28	ENSG00000011677	GABRA3	2556	38.5944	-5.20303	0.596282	-8.75004	2.13271e-18	3.70023e-17
29	ENSG00000013016	EHD3	30845	355.675	2.1425	0.159594	13.4244	4.35218e-41	5.39579e-39
30	ENSG00000013293	SLC7A14	57709	13.9984	-2.40512	0.369606	-4.12551	3.6992e-05	0.000118524
31	ENSG00000013810	TACC3	10460	1203.88	-2.0939	0.154204	-13.5786	5.36238e-42	7.09145e-40
32	ENSG00000015413	DPEP1	1800	79.0006	-2.22201	0.36099	-5.11266	3.1766e-07	1.40237e-06
33	ENSG00000018625	ATP1A2	477	102.852	-2.03916	0.271525	-4.29402	1.7547e-05	5.91961e-05
34	ENSG00000019169	MARCO	8685	790.797	4.67702	0.348382	13.4043	5.70493e-41	7.00001e-39
35	ENSG00000019186	CYP24A1	1591	2.98115	-2.431	0.560777	-2.8487	0.00438983	0.00952963
36	ENSG00000019991	HGF	3082	572.474	2.01958	0.269839	7.48264	7.28448e-14	7.58751e-13
37	ENSG00000024526	DEPDC1	55635	213.302	-3.70479	0.217636	-17.0081	7.15371e-65	3.07748e-62
38	ENSG00000027644	INSRR	3645	6.99067	-3.07765	0.397089	-6.83958	7.94264e-12	6.50458e-11
39	ENSG00000029559	IBSP	3381	13.7099	-6.1165	0.500015	-9.92431	3.26342e-23	9.14628e-22
40	ENSG00000035499	DEPDC1B	55789	230.35	-3.15701	0.227609	-13.8647	1.0368e-43	1.4808e-41
41	ENSG00000036448	MYOM2	9172	103.772	2.0345	0.240917	8.4438	3.07191e-17	4.69343e-16
42	ENSG00000037965	HOXC8	3224	5.93267	-3.51194	0.566697	-5.79134	6.98263e-09	3.87808e-08
43	ENSG00000040731	CDH10	1008	6.43896	-4.50609	0.676279	-4.74254	2.11052e-06	8.24397e-06
44	ENSG00000042062	RIPOR3	140876	150.36	2.01856	0.23099	10.3974	2.54759e-25	8.67151e-24
45	ENSG00000042813	ZPBP	11055	0.384672	2.2888	0.499852	4.59676	4.29105e-06	1.60051e-05
46	ENSG00000043355	ZIC2	7546	234.135	-6.44892	0.318906	-20.0122	4.30902e-89	1.39871e-85
47	ENSG00000046774	MAGEC2	51438	357.481	-7.4172	0.578747	-12.9225	3.36037e-38	3.43798e-36
48	ENSG00000047617	ANO2	57101	49.4857	-2.97273	0.296344	-10.0143	1.31909e-23	3.78614e-22
49	ENSG00000047936	ROS1	6098	23.2057	-2.56253	0.39654	-6.45238	1.10104e-10	7.76337e-10
50	ENSG00000051180	RAD51	5888	139.965	-2.30739	0.170465	-13.5313	1.02207e-41	1.33677e-39
51	ENSG00000051341	POLQ	10721	119.065	-2.95074	0.198024	-14.8886	3.90612e-50	8.06196e-48
52	ENSG00000052850	ALX4	60529	1.66985	-3.67719	0.409533	-4.00667	6.15817e-05	0.000190046
53	ENSG00000053108	FSTL4	23105	95.1027	-4.40488	0.313474	-13.4223	4.47644e-41	5.53064e-39
54	ENSG00000053524	MCF2L2	23101	43.5993	-2.88193	0.29992	-9.11551	7.82982e-20	1.58039e-18
55	ENSG00000053747	LAMA3	3909	1218.33	-2.20852	0.251906	-8.76868	1.8078e-18	3.16109e-17
56	ENSG00000054356	PTPRN	5798	4.65334	-2.36365	0.3595	-6.01511	1.79764e-09	1.08405e-08
57	ENSG00000055118	KCNH2	3757	62.2844	-3.46082	0.357685	-6.62912	3.37696e-11	2.54384e-10
58	ENSG00000055732	MCOLN3	55283	92.1095	-2.4352	0.385686	-6.31817	2.64674e-10	1.78209e-09
59	ENSG00000056291	NPFFR2	10886	56.2434	-5.65509	0.525985	-10.5862	3.45437e-26	1.28615e-24
60	ENSG00000057468	MSH4	4438	5.97268	-2.21444	0.324435	-6.77247	1.26599e-11	1.00968e-10
61	ENSG00000058335	RASGRF1	5923	49.1205	-3.97214	0.310022	-8.0463	8.5336e-16	1.11367e-14
62	ENSG00000060718	COL11A1	1301	60.1431	-3.7728	0.390552	-6.82953	8.51905e-12	6.94954e-11
63	ENSG00000063015	SEZ6	124925	127.507	-6.50666	0.442378	-12.163	4.89439e-34	3.64841e-32
64	ENSG00000064195	DLX3	1747	5.21867	-2.15136	0.495551	-3.7854	0.000153463	0.000443223
65	ENSG00000064787	BCAS1	8537	140.812	-2.38888	0.318174	-7.50913	5.95197e-14	6.27091e-13
66	ENSG00000065325	GLP2R	9340	24.898	2.20525	0.32993	6.68076	2.37699e-11	1.82483e-10
67	ENSG00000065328	MCM10	55388	160.101	-2.99425	0.207544	-14.4184	3.9637e-47	7.04118e-45
68	ENSG00000065609	SNAP91	9892	2.99908	-2.9048	0.553852	-3.48152	0.000498571	0.00130513
69	ENSG00000066032	CTNNA2	1496	358.064	-5.31526	0.507923	-10.5504	5.05806e-26	1.84472e-24
70	ENSG00000066230	SLC9A3	6550	103.712	-3.89154	0.339871	-9.99477	1.60657e-23	4.57816e-22
71	ENSG00000066279	ASPM	259266	818.1	-3.66521	0.191977	-19.0888	3.12825e-81	3.85163e-78
72	ENSG00000066405	CLDN18	51208	9.68237	-4.15038	0.373568	-6.56223	5.30105e-11	3.89865e-10
73	ENSG00000067798	NAV3	89795	259.686	-2.19476	0.292778	-7.49777	6.49145e-14	6.81115e-13
74	ENSG00000068366	ACSL4	2182	12353.2	-2.1126	0.266048	-7.94261	1.97964e-15	2.48891e-14
75	ENSG00000068489	PRR11	55771	255.784	-2.45563	0.183443	-13.3837	7.53181e-41	9.20995e-39
76	ENSG00000068985	PAGE1	8712	57.9486	-7.45333	0.657647	-9.31333	1.2388e-20	2.71533e-19
77	ENSG00000069011	PITX1	5307	220.66	-5.35332	0.401378	-13.316	1.86965e-40	2.23271e-38
78	ENSG00000069482	GAL	51083	11.3715	-2.79429	0.483184	-5.34681	8.95173e-08	4.28517e-07
79	ENSG00000069696	DRD4	1815	40.5155	-2.03679	0.204802	-6.63704	3.20049e-11	2.41753e-10
80	ENSG00000069812	HES2	54626	32.3464	-2.9702	0.3182	-8.79277	1.4592e-18	2.58188e-17
81	ENSG00000070019	GUCY2C	2984	213.766	-2.90456	0.369967	-7.47732	7.58557e-14	7.88502e-13
82	ENSG00000070985	TRPM5	29850	4.1274	-2.90079	0.393691	-5.76111	8.3561e-09	4.59373e-08
83	ENSG00000071539	TRIP13	9319	231.805	-3.3871	0.196579	-17.2195	1.89602e-66	9.95575e-64
84	ENSG00000072041	SLC6A15	55117	6.27432	-5.09777	0.693713	-4.8546	1.2063e-06	4.87961e-06
85	ENSG00000072182	ASIC4	55515	2.13236	-2.03596	0.379982	-4.47481	7.64792e-06	2.73981e-05
86	ENSG00000072571	HMMR	3161	367.204	-3.19355	0.181056	-17.6331	1.37238e-69	8.03315e-67
87	ENSG00000073067	CYP2W1	54905	17.3984	-2.82192	0.311881	-8.49299	2.01386e-17	3.15242e-16
88	ENSG00000073111	MCM2	4171	1400.39	-2.36722	0.169239	-13.9875	1.85952e-44	2.76649e-42
89	ENSG00000073670	ADAM11	4185	36.9074	-2.24926	0.254102	-8.84183	9.41635e-19	1.6998e-17
90	ENSG00000073754	CD5L	922	1055.7	2.92578	0.335607	8.71048	3.0259e-18	5.16211e-17
91	ENSG00000073756	PTGS2	5743	70.3673	2.39055	0.254159	9.40397	5.25446e-21	1.20266e-19
92	ENSG00000073792	IGF2BP2	10644	740.174	-2.23671	0.268206	-8.34114	7.35802e-17	1.08385e-15
93	ENSG00000074181	NOTCH3	4854	1969.68	-2.03042	0.169957	-11.9469	6.74244e-33	4.60316e-31
94	ENSG00000074211	PPP2R2C	5522	161.949	-4.4154	0.446118	-9.91643	3.53151e-23	9.85895e-22
95	ENSG00000074410	CA12	771	1088.65	-2.75343	0.346253	-7.95936	1.72933e-15	2.18498e-14
96	ENSG00000074803	SLC12A1	6557	110.269	-2.76914	0.450235	-5.34097	9.24506e-08	4.41552e-07
97	ENSG00000075218	GTSE1	51512	217.161	-3.49039	0.202887	-17.1911	3.09609e-66	1.55703e-63
98	ENSG00000075388	FGF4	2249	1.76561	-4.16202	0.737216	-3.01135	0.0026009	0.00592534
99	ENSG00000075461	CACNG4	27092	179.247	-3.72227	0.409289	-8.33397	7.81758e-17	1.14776e-15
100	ENSG00000075702	WDR62	284403	294.023	-2.52893	0.171968	-14.7032	6.1522e-49	1.18102e-46
101	ENSG00000077152	UBE2T	29089	368.731	-3.1709	0.156042	-20.3143	9.61405e-92	5.72132e-88
102	ENSG00000077264	PAK3	5063	51.6533	-2.11393	0.377095	-4.31702	1.58153e-05	5.37707e-05
103	ENSG00000077279	DCX	1641	12.7961	-2.21596	0.37029	-5.96499	2.44654e-09	1.44677e-08
104	ENSG00000077327	SPAG6	9576	3.74622	-2.69371	0.40715	-5.37181	7.79496e-08	3.76219e-07
105	ENSG00000077498	TYR	7299	1.18722	-2.24569	0.786876	-2.224	0.0261487	0.0474907
106	ENSG00000077522	ACTN2	88	346.599	-4.52766	0.367962	-11.1751	5.39864e-29	2.66617e-27
107	ENSG00000077935	SMC1B	27127	47.4411	-3.62309	0.330391	-10.9265	8.61286e-28	3.73217e-26
108	ENSG00000078098	FAP	2191	109.274	-2.3354	0.267522	-8.72742	2.60545e-18	4.47261e-17
109	ENSG00000078328	RBFOX1	54715	1.10948	-2.04372	0.505388	-2.43034	0.0150845	0.0290465
110	ENSG00000078399	HOXA9	3205	5.3502	-2.54888	0.350469	-6.09756	1.07699e-09	6.71233e-09
111	ENSG00000078814	MYH7B	57644	119.381	-2.08589	0.212896	-3.9874	6.68009e-05	0.000205196
112	ENSG00000078898	BPIFB2	80341	300.033	-4.51148	0.439314	-7.58634	3.29069e-14	3.5757e-13
113	ENSG00000078900	TP73	7161	136.677	-3.35175	0.238981	-14.0122	1.3133e-44	1.97028e-42
114	ENSG00000079112	CDH17	1015	34.7073	-2.44122	0.422258	-6.83807	8.02672e-12	6.56742e-11
115	ENSG00000079393	DUSP13	51207	8.96201	-5.2129	0.47673	-8.69253	3.54447e-18	6.00658e-17
116	ENSG00000079689	SCGN	10590	609.627	-2.09941	0.310196	-6.77076	1.28109e-11	1.02104e-10
117	ENSG00000080511	RDH8	50700	6.43272	-4.82234	0.528408	-7.29998	2.87801e-13	2.80312e-12
118	ENSG00000080644	CHRNA3	1136	5.79564	-3.82661	0.423693	-6.04909	1.45663e-09	8.90438e-09
119	ENSG00000080709	KCNN2	3781	191.942	3.38911	0.296769	11.4135	3.58051e-30	1.96685e-28
120	ENSG00000080986	NDC80	10403	326.252	-3.27167	0.176106	-18.5705	5.57252e-77	4.73744e-74
121	ENSG00000081051	AFP	174	14402.6	-6.61914	0.420856	-13.5174	1.23425e-41	1.6084e-39
122	ENSG00000081138	CDH7	1005	3.42943	-3.27174	0.553977	-4.12731	3.67033e-05	0.000117663
123	ENSG00000081248	CACNA1S	779	4.78189	-2.70004	0.352862	-6.63518	3.24106e-11	2.44662e-10
124	ENSG00000082196	C1QTNF3	114899	489.747	-3.92503	0.280555	-9.75349	1.78241e-22	4.66247e-21
125	ENSG00000082684	SEMA5B	54437	193.507	-2.27817	0.163924	-13.8945	6.84111e-44	9.88942e-42
126	ENSG00000085831	TTC39A	22996	511.024	-3.09818	0.25292	-12.2503	1.6747e-34	1.28595e-32
127	ENSG00000085840	ORC1	4998	165.416	-2.8833	0.187643	-15.3576	3.15119e-53	7.97987e-51
128	ENSG00000085999	RAD54L	8438	102.651	-3.30877	0.220851	-14.9617	1.3066e-50	2.81045e-48
129	ENSG00000086159	AQP6	363	63.9551	-2.71906	0.404241	-4.12826	3.65525e-05	0.000117211
130	ENSG00000086717	PPEF1	5475	7.58046	-2.25537	0.298289	-7.51472	5.70337e-14	6.02143e-13
131	ENSG00000086967	MYBPC2	4606	4.25036	-2.36676	0.323205	-3.23051	0.00123571	0.00300028
132	ENSG00000086991	NOX4	50507	59.6607	-2.80102	0.181589	-15.403	1.56351e-53	3.98762e-51
133	ENSG00000087237	CETP	1071	468.097	2.76694	0.208993	13.238	5.29492e-40	6.07912e-38
134	ENSG00000087250	MT3	4504	26.3786	-3.94992	0.457273	-7.36782	1.73443e-13	1.73626e-12
135	ENSG00000087258	GNAO1	2775	581.51	2.20337	0.281649	7.82068	5.25383e-15	6.2993e-14
136	ENSG00000087495	PHACTR3	116154	7.76253	2.09324	0.252306	11.3414	8.17873e-30	4.35216e-28
137	ENSG00000087586	AURKA	6790	800.132	-2.66134	0.157947	-16.8485	1.07561e-63	4.22043e-61
138	ENSG00000088325	TPX2	22974	1244.63	-2.07973	0.172625	-12.0478	1.99276e-33	1.40898e-31
139	ENSG00000088340	FER1L4	80307	139.992	-2.89113	0.29248	-9.88214	4.97602e-23	1.372e-21
140	ENSG00000088538	DOCK3	1795	20.2922	-2.47554	0.229948	-9.32941	1.06465e-20	2.35821e-19
141	ENSG00000088836	SLC4A11	83959	86.2621	-2.72301	0.293025	-9.28806	1.57127e-20	3.40642e-19
142	ENSG00000088882	CPXM1	56265	137.767	-2.35258	0.241423	-9.74208	1.99423e-22	5.18816e-21
143	ENSG00000088992	TESC	54997	1253.15	-2.70074	0.30122	-8.9702	2.95968e-19	5.66945e-18
144	ENSG00000089101	CFAP61	26074	4.87723	-2.93154	0.358254	-6.05576	1.39754e-09	8.57546e-09
145	ENSG00000089199	CHGB	1114	11.8433	-4.6852	0.428109	-5.14212	2.71651e-07	1.20942e-06
146	ENSG00000089356	FXYD3	5349	221.211	-2.82717	0.357708	-5.78383	7.30199e-09	4.04664e-08
147	ENSG00000089558	KCNH4	23415	21.0385	-2.22679	0.253132	-8.77688	1.6808e-18	2.95202e-17
148	ENSG00000089685	BIRC5	332	1023.7	-4.03231	0.205608	-19.6089	1.29771e-85	3.56432e-82
149	ENSG00000090382	LYZ	4069	13039.1	-2.12041	0.290525	-7.30114	2.85333e-13	2.77984e-12
150	ENSG00000090402	SI	6476	4.26355	-5.57542	0.639672	-5.22876	1.70653e-07	7.84214e-07
151	ENSG00000090889	KIF4A	24137	463.181	-3.86139	0.197226	-19.5699	2.79423e-85	6.65139e-82
152	ENSG00000090932	DLL3	10683	2.73968	-3.8133	0.477116	-5.60935	2.03085e-08	1.06014e-07
153	ENSG00000091128	LAMB4	22798	8.89229	-2.7863	0.232037	-7.16798	7.61146e-13	7.04628e-12
154	ENSG00000091129	NRCAM	4897	495.107	-2.36777	0.350352	-8.94425	3.74471e-19	7.09329e-18
155	ENSG00000091138	SLC26A3	1811	81.7471	-2.14571	0.345531	-5.99248	2.06662e-09	1.23603e-08
156	ENSG00000091482	SMPX	23676	48.492	-3.15669	0.361006	-8.73063	2.53256e-18	4.35586e-17
157	ENSG00000091622	PITPNM3	83394	82.4543	2.46292	0.273933	8.98847	2.50702e-19	4.83868e-18
158	ENSG00000091651	ORC6	23594	135.877	-2.81416	0.188833	-14.8937	3.62416e-50	7.5235e-48
159	ENSG00000091704	CPA1	1357	10.8083	-6.52223	0.520049	-5.11344	3.16343e-07	1.3969e-06
160	ENSG00000091831	ESR1	2099	599.269	2.43343	0.275364	8.83441	1.00626e-18	1.81188e-17
161	ENSG00000092470	WDR76	79968	276.068	-2.20068	0.168053	-13.0934	3.59307e-39	3.92337e-37
162	ENSG00000092853	CLSPN	63967	79.0698	-2.76085	0.223824	-12.3222	6.87543e-35	5.44333e-33
163	ENSG00000093009	CDC45	8318	254.329	-3.0335	0.185903	-16.3112	8.21153e-60	2.76605e-57
164	ENSG00000094804	CDC6	990	555.703	-3.16938	0.186811	-16.963	1.54256e-64	6.47986e-62
165	ENSG00000095596	CYP26A1	1592	258.41	3.74776	0.346608	10.7995	3.45972e-27	1.41992e-25
166	ENSG00000095752	IL11	3589	6.66634	-3.61013	0.291105	-3.65241	0.000259793	0.000717343
167	ENSG00000096088	PGC	5225	1298.99	-9.25053	0.533612	-15.4293	1.03927e-53	2.66966e-51
168	ENSG00000097046	CDC7	8317	182.453	-2.03611	0.160284	-12.7005	5.87162e-37	5.37569e-35
169	ENSG00000099399	MAGEB2	4113	106.43	-7.02087	0.696292	-11.5227	1.01348e-30	5.84612e-29
170	ENSG00000099769	IGFALS	3483	2431.02	3.09583	0.31262	9.89622	4.32303e-23	1.19936e-21
171	ENSG00000099812	MISP	126353	295.974	-2.99028	0.436606	-6.03144	1.62506e-09	9.87651e-09
172	ENSG00000099822	HCN2	610	79.0141	-3.20946	0.289881	-11.0583	1.99762e-28	9.23923e-27
173	ENSG00000099953	MMP11	4320	773.721	-3.72285	0.242905	-15.3262	5.11174e-53	1.28535e-50
174	ENSG00000100162	CENPM	79019	292.889	-3.49157	0.205594	-16.9747	1.26485e-64	5.37651e-62
175	ENSG00000100167	SEPTIN3	55964	64.1953	-3.05992	0.268013	-11.3995	4.20688e-30	2.28631e-28
176	ENSG00000100206	DMC1	11144	19.6558	-2.26662	0.272618	-8.29444	1.09095e-16	1.56754e-15
177	ENSG00000100253	MIOX	55586	48.0002	-4.01652	0.370123	-10.4614	1.29976e-25	4.53658e-24
178	ENSG00000100302	RASD2	23551	61.8528	-2.61792	0.177587	-14.7251	4.45098e-49	8.59063e-47
179	ENSG00000100346	CACNA1I	8911	35.1672	-3.16406	0.375103	-7.03389	2.00849e-12	1.76335e-11
180	ENSG00000100362	PVALB	5816	15.2538	3.55954	0.311402	11.4244	3.15941e-30	1.74628e-28
181	ENSG00000100373	UPK3A	7380	400.116	-5.3356	0.440936	-12.138	6.64464e-34	4.88176e-32
182	ENSG00000100473	COCH	1690	233.769	-4.20674	0.311106	-13.5131	1.30926e-41	1.69124e-39
183	ENSG00000100526	CDKN3	1033	367.934	-3.86375	0.187309	-20.6149	2.01938e-94	1.8026e-90
184	ENSG00000100577	GSTZ1	2954	2541.84	2.0153	0.181152	11.1244	9.54589e-29	4.57511e-27
185	ENSG00000100593	ISM2	145501	4.76242	-4.30579	0.584732	-5.67389	1.39594e-08	7.47165e-08
186	ENSG00000100604	CHGA	1113	26.1177	-6.64062	0.428629	-10.3728	3.29854e-25	1.10693e-23
187	ENSG00000100625	SIX4	51804	55.8054	-3.29903	0.267565	-12.3016	8.87437e-35	6.96413e-33
188	ENSG00000100739	BDKRB1	623	29.256	-2.68148	0.267625	-9.01394	1.98782e-19	3.85988e-18
189	ENSG00000100985	MMP9	4318	803.293	-2.00404	0.28496	-7.03451	1.99965e-12	1.75644e-11
190	ENSG00000100987	VSX1	30813	14.6306	-2.16662	0.320922	-6.73458	1.64405e-11	1.2913e-10
191	ENSG00000101003	GINS1	9837	370.599	-2.7003	0.181125	-14.9061	3.0096e-50	6.35863e-48
192	ENSG00000101057	MYBL2	4605	955.486	-4.47953	0.241114	-18.5756	5.06398e-77	4.41011e-74
193	ENSG00000101144	BMP7	655	26.0024	-3.41672	0.482782	-7.26414	3.75406e-13	3.59942e-12
194	ENSG00000101197	BIRC7	79444	15.0812	-2.2815	0.347546	-3.41149	0.000646099	0.00165754
195	ENSG00000101198	NKAIN4	128414	2.85256	-2.91334	0.363834	-4.18215	2.88765e-05	9.40751e-05
196	ENSG00000101210	EEF1A2	1917	3980.67	-3.76937	0.383006	-9.86204	6.08012e-23	1.66469e-21
197	ENSG00000101311	FERMT1	55612	211.012	-2.13536	0.293598	-7.27425	3.4836e-13	3.35723e-12
198	ENSG00000101342	TLDC2	140711	118.715	-2.32071	0.209978	-11.0478	2.24688e-28	1.03e-26
199	ENSG00000101412	E2F1	1869	881.254	-3.61865	0.202322	-17.8838	1.57773e-71	1.06292e-68
200	ENSG00000101441	CST4	1472	3.65632	-3.62376	0.708919	-3.97004	7.18614e-05	0.000219363
201	ENSG00000101447	FAM83D	81610	516.165	-2.37039	0.164058	-14.4474	2.60253e-47	4.66964e-45
202	ENSG00000101842	VSIG1	340547	88.9269	-3.85722	0.375197	-9.55769	1.20412e-21	2.93677e-20
203	ENSG00000101951	PAGE4	9506	432.551	-7.51075	0.558318	-11.9185	9.48273e-33	6.43708e-31
204	ENSG00000102021	LUZP4	51213	3.17311	-4.06209	0.779274	-3.84765	0.000119254	0.000350864
205	ENSG00000102109	PCSK1N	27344	122.322	-3.90161	0.439084	-6.91517	4.67312e-12	3.94091e-11
206	ENSG00000102174	PHEX	5251	39.6844	-3.09069	0.327843	-9.40377	5.26402e-21	1.20408e-19
207	ENSG00000102239	BRS3	680	0.760911	-2.51474	0.464573	-2.66828	0.00762407	0.0156993
208	ENSG00000102287	GABRE	2564	823.142	-2.79541	0.23204	-12.0479	1.98852e-33	1.40877e-31
209	ENSG00000102384	CENPI	2491	88.2522	-3.05934	0.191223	-15.9782	1.81168e-57	5.34611e-55
210	ENSG00000102385	DRP2	1821	4.85167	-3.63583	0.397128	-8.38498	5.07363e-17	7.59895e-16
211	ENSG00000102683	SGCG	6445	0.938587	-2.35475	0.434394	-3.15337	0.00161396	0.00383037
212	ENSG00000102837	OLFM4	10562	16.4987	-3.70132	0.496312	-3.38142	0.00072113	0.00183186
213	ENSG00000103253	HAGHL	84264	102.81	-2.78847	0.248347	-11.2205	3.23382e-29	1.63089e-27
214	ENSG00000103375	AQP8	343	165.552	-3.61503	0.3802	-10.2131	1.73234e-24	5.38205e-23
215	ENSG00000103534	TMC5	79838	389.7	-2.84971	0.361109	-7.46464	8.35248e-14	8.64195e-13
216	ENSG00000103546	SLC6A2	6530	245.411	-2.89805	0.538405	-4.0326	5.51633e-05	0.000171499
217	ENSG00000103710	RASL12	51285	150.917	-2.20619	0.156914	-14.0558	7.09589e-45	1.09209e-42
218	ENSG00000103742	IGDCC4	57722	51.8045	-3.02591	0.321135	-8.96948	2.97913e-19	5.70057e-18
219	ENSG00000103888	CEMIP	57214	224.279	-2.55798	0.266675	-8.85453	8.40408e-19	1.52711e-17
220	ENSG00000104044	OCA2	4948	61.6567	-2.97262	0.386733	-5.30012	1.1573e-07	5.44217e-07
221	ENSG00000104112	SCG3	29106	7.1966	-2.23593	0.367408	-3.57373	0.000351929	0.000948878
222	ENSG00000104140	RHOV	171177	39.8085	-2.26769	0.363045	-4.38044	1.18442e-05	4.11431e-05
223	ENSG00000104147	OIP5	11339	90.8947	-2.21721	0.174151	-12.7254	4.27513e-37	3.98558e-35
224	ENSG00000104177	MYEF2	50804	133.654	-2.23325	0.298279	-7.48724	7.03365e-14	7.33908e-13
225	ENSG00000104313	EYA1	2138	5.61444	-3.84807	0.434233	-6.06628	1.3091e-09	8.05772e-09
226	ENSG00000104332	SFRP1	6422	100.104	2.35041	0.301228	7.79954	6.2134e-15	7.39026e-14
227	ENSG00000104371	DKK4	27121	123.158	-4.59367	0.450777	-8.4379	3.23096e-17	4.93012e-16
228	ENSG00000104722	NEFM	4741	2.26505	-2.0332	0.516203	-3.30324	0.000955729	0.00237542
229	ENSG00000104833	TUBB4A	10382	448.972	-2.50073	0.356147	-8.64739	5.26886e-18	8.74209e-17
230	ENSG00000104899	AMH	268	27.8181	-2.39002	0.311878	-7.65045	2.00275e-14	2.24029e-13
231	ENSG00000104938	CLEC4M	10332	218.956	5.21089	0.484107	10.6929	1.09874e-26	4.3017e-25
232	ENSG00000105011	ASF1B	55723	392.961	-2.94133	0.1855	-15.8531	1.33775e-56	3.79094e-54
233	ENSG00000105048	TNNT1	7138	45.0077	-3.4843	0.38257	-7.67216	1.69129e-14	1.91045e-13
234	ENSG00000105173	CCNE1	898	249.48	-3.95265	0.248229	-14.1889	1.07326e-45	1.75788e-43
235	ENSG00000105278	ZFR2	23217	6.39974	-2.6765	0.328364	-3.61942	0.000295261	0.00080755
236	ENSG00000105290	APLP1	333	156.986	-2.85845	0.297732	-8.81675	1.17832e-18	2.10261e-17
237	ENSG00000105376	ICAM5	7087	23.8065	-2.45579	0.347726	-7.04808	1.81402e-12	1.60127e-11
238	ENSG00000105467	SYNGR4	23546	9.21799	-2.09981	0.262116	-6.11454	9.68373e-10	6.07035e-09
239	ENSG00000105641	SLC5A5	6528	4.71236	-2.48465	0.342103	-4.32536	1.52282e-05	5.19381e-05
240	ENSG00000105642	KCNN1	3780	16.7924	-2.5283	0.302877	-8.31541	9.1435e-17	1.32931e-15
241	ENSG00000105664	COMP	1311	128.633	-2.70954	0.392721	-8.29825	1.05657e-16	1.52305e-15
242	ENSG00000105668	UPK1A	11045	17.3602	-2.87648	0.333755	-7.51981	5.48579e-14	5.80373e-13
243	ENSG00000105675	ATP4A	495	4.69565	-3.15204	0.530396	-4.49716	6.88666e-06	2.48354e-05
244	ENSG00000105695	MAG	4099	6.97428	2.81219	0.366862	7.66005	1.85866e-14	2.08695e-13
245	ENSG00000105697	HAMP	57817	6468.95	3.4313	0.397276	8.61989	6.70161e-18	1.09967e-16
246	ENSG00000105880	DLX5	1749	12.3466	-5.09088	0.455664	-9.73262	2.18888e-22	5.65529e-21
247	ENSG00000105889	STEAP1B	256227	9.33665	-3.33269	0.321033	-8.63851	5.69527e-18	9.41024e-17
248	ENSG00000105997	HOXA3	3200	123.185	-2.7641	0.274375	-10.0705	7.46069e-24	2.18533e-22
249	ENSG00000106006	HOXA6	3203	3.07276	-3.14952	0.501202	-6.28363	3.30756e-10	2.2013e-09
250	ENSG00000106013	ANKRD7	56311	2.32767	-2.4967	0.50388	-4.95698	7.1599e-07	2.99043e-06
251	ENSG00000106031	HOXA13	3209	272.946	-6.66193	0.367481	-17.9596	4.03736e-72	2.88316e-69
252	ENSG00000106034	CPED1	79974	778.963	2.00388	0.212434	9.43215	4.01781e-21	9.31559e-20
253	ENSG00000106038	EVX1	2128	13.488	-5.70253	0.484839	-10.9489	6.72714e-28	2.95085e-26
254	ENSG00000106128	GHRHR	2692	76.0317	-3.52454	0.405433	-8.69247	3.5463e-18	6.00684e-17
255	ENSG00000106236	NPTX2	4885	374.85	-2.28061	0.392793	-4.4135	1.01712e-05	3.56619e-05
256	ENSG00000106366	SERPINE1	5054	9233.51	2.18072	0.234522	9.29722	1.44171e-20	3.14079e-19
257	ENSG00000106462	EZH2	2146	511.088	-2.38099	0.139442	-17.0735	2.33844e-65	1.05691e-62
258	ENSG00000106483	SFRP4	6424	226.705	-2.90999	0.281006	-10.3553	3.9606e-25	1.31919e-23
259	ENSG00000106541	AGR2	10551	351.681	-3.71422	0.483893	-6.02152	1.72784e-09	1.04443e-08
260	ENSG00000107105	ELAVL2	1993	4.21506	-2.35253	0.347179	-6.72025	1.81417e-11	1.41465e-10
261	ENSG00000107159	CA9	768	384.137	-2.92113	0.416569	-5.13215	2.86446e-07	1.27133e-06
262	ENSG00000107165	TYRP1	7306	20.1178	-3.86935	0.445881	-6.83451	8.22877e-12	6.72811e-11
263	ENSG00000107187	LHX3	8022	36.0755	-3.50546	0.468177	-7.1014	1.23503e-12	1.11725e-11
264	ENSG00000107317	PTGDS	5730	2888.59	-2.43836	0.352327	-2.37152	0.017715	0.0335722
265	ENSG00000107447	DNTT	1791	2.02686	-2.16511	0.57026	-3.54181	0.000397387	0.00106015
266	ENSG00000107562	CXCL12	6387	3337.58	2.6385	0.220781	11.9491	6.56162e-33	4.49691e-31
267	ENSG00000107807	TLX1	3195	154.98	-2.78329	0.257292	-10.8148	2.92953e-27	1.21489e-25
268	ENSG00000107864	CPEB3	22849	725.253	2.27055	0.16565	13.7065	9.28605e-43	1.28018e-40
269	ENSG00000107984	DKK1	22943	594.668	-5.45539	0.430628	-12.0606	1.70595e-33	1.22069e-31
270	ENSG00000108001	EBF3	253738	41.2773	-2.23094	0.215172	-10.3567	3.90199e-25	1.30088e-23
271	ENSG00000108231	LGI1	9211	10.4398	2.41359	0.397237	6.06914	1.28593e-09	7.92056e-09
272	ENSG00000108342	CSF3	1440	2.45044	2.77354	0.377455	7.34759	2.01813e-13	2.00388e-12
273	ENSG00000108448	TRIM16L	147166	1115.86	-2.37104	0.248189	-9.55488	1.23728e-21	3.01147e-20
274	ENSG00000108602	ALDH3A1	218	4707.56	-4.89702	0.424918	-10.8648	1.69506e-27	7.1626e-26
275	ENSG00000108813	DLX4	1748	13.6121	-2.58299	0.360092	-7.14162	9.22349e-13	8.4727e-12
276	ENSG00000108878	CACNG1	786	4.9197	-4.50054	0.520347	-6.64285	3.07677e-11	2.33052e-10
277	ENSG00000109061	MYH1	4619	8.89108	-2.63414	0.525984	-5.69504	1.23343e-08	6.63463e-08
278	ENSG00000109182	CWH43	80157	12.37	2.67158	0.427638	6.2356	4.50055e-10	2.94424e-09
279	ENSG00000109205	ODAM	54959	189.548	-6.65186	0.569266	-10.9871	4.41099e-28	1.96628e-26
280	ENSG00000109576	AADAT	51166	597.846	2.77907	0.210459	13.2033	8.3991e-40	9.4012e-38
281	ENSG00000109674	NEIL3	55247	78.8738	-4.07824	0.243806	-16.6631	2.43271e-62	8.68624e-60
282	ENSG00000109705	NKX3-2	579	8.25432	-4.24318	0.468398	-8.54	1.34221e-17	2.13664e-16
283	ENSG00000109805	NCAPG	64151	404.005	-3.74868	0.195927	-19.1238	1.59965e-81	2.19682e-78
284	ENSG00000110148	CCKBR	887	1.62726	-3.02644	0.620495	-3.59637	0.000322689	0.000876725
285	ENSG00000110195	FOLR1	2348	54.6226	-2.08331	0.365516	-5.28101	1.28474e-07	6.00964e-07
286	ENSG00000110244	APOA4	337	6252.19	-2.5166	0.433238	-2.39873	0.0164523	0.0314028
287	ENSG00000110492	MDK	4192	7193.33	-3.74594	0.232276	-16.1306	1.5541e-58	4.78368e-56
288	ENSG00000110680	CALCA	796	79.4532	-3.86452	0.385212	-5.32805	9.92722e-08	4.71672e-07
289	ENSG00000110881	ASIC1	41	132.803	-3.24569	0.284392	-11.4058	3.91117e-30	2.14191e-28
290	ENSG00000110975	SYT10	341359	2.59926	2.96251	0.528985	5.57297	2.5043e-08	1.28938e-07
291	ENSG00000111206	FOXM1	2305	705.994	-3.55583	0.195451	-18.1899	6.20541e-74	4.71427e-71
292	ENSG00000111247	RAD51AP1	10635	167.516	-2.24261	0.174452	-12.8516	8.42532e-38	8.31034e-36
293	ENSG00000111432	FZD10	11211	12.7993	-2.98676	0.344536	-7.1888	6.53629e-13	6.11435e-12
294	ENSG00000111665	CDCA3	83461	318.746	-3.26147	0.181651	-17.9478	4.99391e-72	3.49632e-69
295	ENSG00000111713	GYS2	2998	2801.8	2.14435	0.280995	7.62896	2.36664e-14	2.62677e-13
296	ENSG00000112139	MDGA1	266727	248.723	-2.07616	0.266694	-7.28641	3.18334e-13	3.08954e-12
297	ENSG00000112164	GLP1R	2740	17.781	-5.57678	0.56601	-9.22354	2.87455e-20	6.05539e-19
298	ENSG00000112175	BMP5	653	45.9551	2.39668	0.352614	6.79143	1.11024e-11	8.91241e-11
299	ENSG00000112183	RBM24	221662	256.929	-2.50286	0.234987	-10.6499	1.74508e-26	6.70719e-25
300	ENSG00000112186	CAP2	10486	1296.75	-2.23278	0.16067	-13.8965	6.64745e-44	9.64853e-42
301	ENSG00000112212	TSPO2	222642	33.8216	-2.13987	0.240338	-8.89354	5.91909e-19	1.09393e-17
302	ENSG00000112246	SIM1	6492	60.1244	-2.04622	0.420405	-4.34388	1.39985e-05	4.80237e-05
303	ENSG00000112273	HDGFL1	154150	4.4651	-5.13713	0.721994	-4.7223	2.33195e-06	9.05739e-06
304	ENSG00000112280	COL9A1	1297	26.2967	-3.77723	0.290109	-12.9081	4.05062e-38	4.12055e-36
305	ENSG00000112312	GMNN	51053	1687.98	-2.1763	0.144339	-15.0776	2.27415e-51	5.1393e-49
306	ENSG00000112379	ARFGEF3	57221	367.646	-2.88576	0.291887	-9.88863	4.66382e-23	1.2899e-21
307	ENSG00000112559	MDFI	4188	147.07	-2.3614	0.273066	-8.64676	5.29834e-18	8.78285e-17
308	ENSG00000112655	PTK7	5754	615.545	-2.16929	0.256778	-8.44931	2.93036e-17	4.49062e-16
309	ENSG00000112742	TTK	7272	216.724	-3.73027	0.209647	-17.7765	1.07533e-70	6.73608e-68
310	ENSG00000112818	MEP1A	4224	320.41	-6.12762	0.443172	-13.3095	2.03968e-40	2.42763e-38
311	ENSG00000112852	PCDHB2	56133	59.6232	-2.82013	0.315678	-8.92542	4.44024e-19	8.3356e-18
312	ENSG00000112964	GHR	2690	3689.57	2.44796	0.212075	11.5416	8.13578e-31	4.74667e-29
313	ENSG00000112984	KIF20A	10112	427.16	-3.66532	0.196698	-18.627	1.94022e-77	1.77634e-74
314	ENSG00000113100	CDH9	1007	14.8337	-5.15514	0.713576	-8.92641	4.40065e-19	8.26563e-18
315	ENSG00000113249	HAVCR1	26762	28.4883	-4.91024	0.416347	-9.06977	1.19266e-19	2.36321e-18
316	ENSG00000113296	THBS4	7060	721.763	-5.61486	0.27462	-19.5981	1.60521e-85	4.09397e-82
317	ENSG00000113303	BTNL8	79908	238.215	-3.45423	0.388983	-8.89122	6.04431e-19	1.11592e-17
318	ENSG00000113327	GABRG2	2566	10.9026	-4.54414	0.667026	-6.82271	8.93397e-12	7.2714e-11
319	ENSG00000113594	LIFR	3977	882.622	2.79051	0.206659	13.5015	1.53189e-41	1.96048e-39
320	ENSG00000113600	C9	735	22567	2.50402	0.362333	6.90388	5.06009e-12	4.24919e-11
321	ENSG00000113739	STC2	8614	420.251	-2.00175	0.223337	-8.29602	1.0766e-16	1.54879e-15
322	ENSG00000113763	UNC5A	90249	23.6317	-2.78799	0.269972	-7.78949	6.72828e-15	7.96288e-14
323	ENSG00000114113	RBP2	5948	20.4342	-4.11646	0.417858	-7.1284	1.01544e-12	9.27297e-12
324	ENSG00000114204	SERPINI2	5276	1.03294	-2.99089	0.50115	-3.80919	0.000139421	0.000405366
325	ENSG00000114270	COL7A1	1294	757.205	-2.64174	0.290337	-10.7753	4.50301e-27	1.82709e-25
326	ENSG00000114346	ECT2	1894	545.662	-2.36514	0.169885	-13.9211	4.71575e-44	6.87267e-42
327	ENSG00000114631	PODXL2	50512	429.502	-2.00177	0.338291	-5.92061	3.2075e-09	1.86648e-08
328	ENSG00000114646	CSPG5	10675	63.8461	-2.48298	0.219308	-11.3119	1.14553e-29	5.9974e-28
329	ENSG00000114812	VIPR1	7433	321.5	3.42319	0.243124	14.0764	5.30097e-45	8.33817e-43
330	ENSG00000114854	TNNC1	7134	112.348	-2.97165	0.311259	-8.97521	2.82808e-19	5.43192e-18
331	ENSG00000114923	SLC4A3	6508	106.743	-2.5608	0.340343	-7.12694	1.02621e-12	9.36654e-12
332	ENSG00000114948	ADAM23	8745	109.337	-3.04547	0.319871	-8.10662	5.20484e-16	6.94484e-15
333	ENSG00000115163	CENPA	1058	132.485	-4.04128	0.218302	-18.4728	3.41956e-76	2.71331e-73
334	ENSG00000115194	SLC30A3	7781	40.6845	-4.7317	0.344406	-10.4407	1.61602e-25	5.60753e-24
335	ENSG00000115263	GCG	2641	2.54739	-4.7736	0.602628	-3.53736	0.000404146	0.0010765
336	ENSG00000115297	TLX2	3196	4.32302	-3.47621	0.493547	-6.6303	3.34999e-11	2.52565e-10
337	ENSG00000115353	TACR1	6869	13.2134	-3.22384	0.297008	-4.32738	1.50894e-05	5.1494e-05
338	ENSG00000115386	REG1A	5967	999.925	-8.88107	0.568746	-12.1937	3.35794e-34	2.52951e-32
339	ENSG00000115507	OTX1	5013	55.5943	-4.31119	0.288473	-14.8478	7.18377e-50	1.44917e-47
340	ENSG00000115596	WNT6	7475	11.9482	-2.77279	0.265666	-5.82473	5.72044e-09	3.21306e-08
341	ENSG00000115602	IL1RL1	9173	82.5728	3.27433	0.306108	10.6902	1.13171e-26	4.42112e-25
342	ENSG00000115844	DLX2	1746	4.78153	-4.0845	0.507652	-6.42755	1.29681e-10	9.05967e-10
343	ENSG00000115963	RND3	390	2366.74	2.47832	0.164174	15.0951	1.74422e-51	4.018e-49
344	ENSG00000116014	KISS1R	84634	11.6627	-4.05942	0.49816	-6.9708	3.15142e-12	2.70232e-11
345	ENSG00000116017	ARID3A	1820	783.515	-2.46624	0.238681	-10.3338	4.95498e-25	1.62463e-23
346	ENSG00000116035	VAX2	25806	19.7117	-3.33401	0.328999	-9.65828	4.53418e-22	1.14012e-20
347	ENSG00000116132	PRRX1	5396	127.735	-2.39286	0.232606	-9.67703	3.77524e-22	9.58057e-21
348	ENSG00000116675	DNAJC6	9829	207.063	-2.53924	0.203101	-12.4992	7.53883e-36	6.47071e-34
349	ENSG00000116748	AMPD1	270	4.16567	2.11951	0.37996	5.57625	2.45757e-08	1.26678e-07
350	ENSG00000116882	HAO2	51179	3568.55	2.3015	0.322213	7.13872	9.42069e-13	8.63608e-12
351	ENSG00000117069	ST6GALNAC5	81849	14.2678	-2.60317	0.374849	-6.9136	4.72496e-12	3.98088e-11
352	ENSG00000117148	ACTL8	81569	38.0988	-6.64979	0.573923	-9.83867	7.67217e-23	2.0848e-21
353	ENSG00000117399	CDC20	991	795.009	-4.21149	0.218553	-19.2652	1.05251e-82	1.63396e-79
354	ENSG00000117600	PLPPR4	9890	25.5415	-2.79086	0.298097	-9.33366	1.02275e-20	2.26822e-19
355	ENSG00000117632	STMN1	3925	3289.88	-2.08947	0.145395	-14.3711	7.86168e-47	1.36267e-44
356	ENSG00000117650	NEK2	4751	335.215	-3.87869	0.19946	-19.433	4.05922e-84	8.05215e-81
357	ENSG00000117724	CENPF	1063	988.025	-3.83964	0.190471	-20.1556	2.40125e-90	9.52655e-87
358	ENSG00000117983	MUC5B	727897	1141.68	-2.46057	0.481644	-5.23066	1.68907e-07	7.76588e-07
359	ENSG00000118156	ZNF541	84215	71.0305	-2.22607	0.280149	-7.21592	5.35701e-13	5.05891e-12
360	ENSG00000118193	KIF14	9928	189.826	-3.0526	0.188705	-16.1673	8.57895e-59	2.66365e-56
361	ENSG00000118194	TNNT2	7139	29.1453	-2.10075	0.322076	-6.5155	7.24489e-11	5.23127e-10
362	ENSG00000118245	TNP1	7141	1.59712	-6.78837	0.689765	-3.14307	0.00167186	0.00395571
363	ENSG00000118432	CNR1	1268	46.0652	-2.54637	0.349532	-7.28045	3.32702e-13	3.2185e-12
364	ENSG00000118557	PMFBP1	83449	44.0443	-2.71155	0.227541	-11.8957	1.24633e-32	8.36494e-31
365	ENSG00000118733	OLFM3	118427	6.80296	-2.62808	0.630925	-3.46053	0.000539118	0.00140284
366	ENSG00000118785	SPP1	6696	29655.1	-4.11868	0.353626	-11.6663	1.89584e-31	1.17932e-29
367	ENSG00000118972	FGF23	8074	9.04957	3.22213	0.586173	5.4437	5.21851e-08	2.57614e-07
368	ENSG00000119457	SLC46A2	57864	5.82414	-2.28263	0.356047	-3.44603	0.000568886	0.00147428
369	ENSG00000119508	NR4A3	8013	230.101	2.17778	0.235083	9.26263	1.9946e-20	4.28e-19
370	ENSG00000119915	ELOVL3	83401	13.4275	-2.35636	0.350321	-6.70214	2.05394e-11	1.59085e-10
371	ENSG00000119946	CNNM1	26507	271.317	-2.52139	0.341997	-7.37692	1.61995e-13	1.62752e-12
372	ENSG00000119969	HELLS	3070	317.255	-2.37304	0.1773	-13.3825	7.65478e-41	9.32839e-39
373	ENSG00000120068	HOXB8	3218	3.95018	-3.82328	0.436512	-6.95131	3.6191e-12	3.08778e-11
374	ENSG00000120210	INSL6	11172	5.46525	-3.29786	0.607216	-4.63626	3.54768e-06	1.34074e-05
375	ENSG00000120251	GRIA2	2891	4.47913	-3.04343	0.527709	-4.293	1.76279e-05	5.94467e-05
376	ENSG00000120262	CCDC170	80129	369.09	-2.42098	0.262801	-9.21309	3.16866e-20	6.6514e-19
377	ENSG00000120322	PCDHB8	56128	24.1711	-2.39383	0.35249	-6.77972	1.20412e-11	9.62917e-11
378	ENSG00000120334	CENPL	91687	184.747	-2.34661	0.140195	-16.7333	7.49371e-63	2.78719e-60
379	ENSG00000120498	TEX11	56159	50.2849	-3.85246	0.40997	-8.98446	2.60007e-19	5.01557e-18
380	ENSG00000120669	SOHLH2	54937	17.5795	-4.44277	0.644047	-6.41034	1.45196e-10	1.00824e-09
381	ENSG00000120738	EGR1	1958	7752.49	2.56897	0.212376	12.0949	1.12329e-33	8.11906e-32
382	ENSG00000120833	SOCS2	8835	1088.96	2.17751	0.20344	10.7026	9.89251e-27	3.91165e-25
383	ENSG00000120907	ADRA1A	148	507.96	3.04973	0.29893	10.1966	2.05284e-24	6.32978e-23
384	ENSG00000121075	TBX4	9496	46.6115	-7.33274	0.495999	-12.4655	1.15183e-35	9.63166e-34
385	ENSG00000121152	NCAPH	23397	242.244	-2.935	0.180215	-16.2799	1.37185e-59	4.53548e-57
386	ENSG00000121207	LRAT	9227	141.273	2.88364	0.205462	14.0336	9.70909e-45	1.48787e-42
387	ENSG00000121211	MND1	84057	109.514	-2.89353	0.179228	-16.1299	1.57347e-58	4.8019e-56
388	ENSG00000121446	RGSL1	353299	93.6222	-2.90633	0.443131	-6.32718	2.49676e-10	1.68588e-09
389	ENSG00000121454	LHX4	89884	38.3688	-2.4985	0.202266	-12.3329	6.0236e-35	4.80086e-33
390	ENSG00000121621	KIF18A	81930	110.605	-3.29381	0.205832	-15.9818	1.71046e-57	5.08946e-55
391	ENSG00000121742	GJB6	10804	9.77697	-2.90101	0.439689	-4.09715	4.18267e-05	0.00013273
392	ENSG00000121743	GJA3	2700	6.45865	-2.14515	0.352035	-4.43077	9.3899e-06	3.31267e-05
393	ENSG00000121753	ADGRB2	576	32.3783	-2.84416	0.270612	-7.36695	1.74574e-13	1.74699e-12
394	ENSG00000121871	SLITRK3	22865	136.565	2.56784	0.492679	5.19237	2.07632e-07	9.41903e-07
395	ENSG00000121904	CSMD2	114784	70.1496	-3.04433	0.277333	-10.9633	5.73471e-28	2.53734e-26
396	ENSG00000122133	PAEP	5047	125.488	-8.19288	0.571771	-10.714	8.75123e-27	3.47964e-25
397	ENSG00000122375	OPN4	94233	1.96052	-2.93118	0.494344	-5.92954	3.03787e-09	1.77297e-08
398	ENSG00000122420	PTGFR	5737	305.641	-2.00047	0.339681	-5.89233	3.80798e-09	2.19303e-08
399	ENSG00000122592	HOXA7	3204	2.77702	-2.01112	0.452627	-4.42258	9.75306e-06	3.4313e-05
400	ENSG00000122711	SPINK4	27290	4.84563	-2.22613	0.528442	-6.33257	2.41111e-10	1.63206e-09
401	ENSG00000122824	NUDT10	170685	10.1704	2.86222	0.349145	8.19207	2.56773e-16	3.55499e-15
402	ENSG00000122877	EGR2	1959	205.619	2.50736	0.221183	11.3348	8.8243e-30	4.6674e-28
403	ENSG00000122952	ZWINT	11130	715.697	-2.43085	0.161872	-15.0164	5.73436e-51	1.25614e-48
404	ENSG00000123080	CDKN2C	1031	764.035	-2.26402	0.159656	-14.1801	1.21621e-45	1.97391e-43
405	ENSG00000123219	CENPK	64105	111.995	-2.59823	0.183267	-14.1685	1.43571e-45	2.31961e-43
406	ENSG00000123243	ITIH5	80760	480.976	-2.03155	0.308492	-2.9537	0.00313985	0.0070404
407	ENSG00000123358	NR4A1	3164	1592.29	2.12554	0.216478	9.81775	9.44247e-23	2.54263e-21
408	ENSG00000123364	HOXC13	3229	3.59723	-4.11173	0.592775	-5.52032	3.38392e-08	1.71288e-07
409	ENSG00000123388	HOXC11	3227	1.82408	-3.23985	0.642511	-3.79753	0.000146142	0.000423414
410	ENSG00000123454	DBH	1621	451.07	3.17127	0.236129	13.4274	4.17965e-41	5.21813e-39
411	ENSG00000123473	STIL	6491	188.456	-2.35104	0.158939	-14.788	1.75159e-49	3.47458e-47
412	ENSG00000123485	HJURP	55355	334.444	-3.84169	0.196507	-19.537	5.32572e-85	1.1885e-81
413	ENSG00000123999	INHA	3623	36.8818	-4.56873	0.380667	-8.25944	1.46353e-16	2.07863e-15
414	ENSG00000124143	ARHGAP40	343578	15.0892	-2.61356	0.458138	-5.32621	1.00281e-07	4.76084e-07
415	ENSG00000124194	GDAP1L1	78997	3.65984	-3.09414	0.383381	-5.27267	1.34455e-07	6.26499e-07
416	ENSG00000124205	EDN3	1908	3.78866	-2.06203	0.52277	-2.77274	0.0055586	0.0118014
417	ENSG00000124232	RBPJL	11317	2.1558	-7.06649	0.445649	-3.66993	0.000242621	0.00067364
418	ENSG00000124253	PCK1	5105	49016.6	2.17208	0.283843	7.64996	2.01044e-14	2.24819e-13
419	ENSG00000124260	MAGEA10	4109	7.09901	-4.56804	0.690584	-5.35022	8.78476e-08	4.20919e-07
420	ENSG00000124490	CRISP2	7180	6.45983	-4.49883	0.703226	-4.8803	1.05922e-06	4.31595e-06
421	ENSG00000124493	GRM4	2914	4.66171	-3.3186	0.432949	-6.28371	3.30591e-10	2.20061e-09
422	ENSG00000124507	PACSIN1	29993	111.004	-2.11259	0.295527	-7.1482	8.79239e-13	8.09544e-12
423	ENSG00000124657	OR2B6	26212	11.0337	-2.23499	0.278232	-8.0022	1.22213e-15	1.56856e-14
424	ENSG00000124664	SPDEF	25803	35.5184	-2.62967	0.385452	-3.87384	0.000107135	0.00031809
425	ENSG00000124721	DNAH8	1769	11.866	-2.13343	0.312176	-6.81154	9.65573e-12	7.82066e-11
426	ENSG00000124935	SCGB1D2	10647	7.60585	-4.89591	0.601416	-6.16781	6.92442e-10	4.42454e-09
427	ENSG00000124939	SCGB2A1	4246	11.4312	-2.84219	0.401637	-5.82007	5.88246e-09	3.30094e-08
428	ENSG00000125046	SSUH2	51066	245.671	-3.76737	0.312816	-12.042	2.13772e-33	1.50255e-31
429	ENSG00000125144	MT1G	4495	19300.5	2.36395	0.41657	5.66508	1.4696e-08	7.83537e-08
430	ENSG00000125148	MT2A	4502	38650.9	2.39664	0.279394	8.57516	9.89501e-18	1.59509e-16
431	ENSG00000125285	SOX21	11166	2.51596	-3.83842	0.491915	-4.83618	1.3236e-06	5.31854e-06
432	ENSG00000125462	C1orf61	10485	20.5562	-3.05562	0.315327	-7.74514	9.54735e-15	1.11114e-13
433	ENSG00000125740	FOSB	2354	1995.09	3.15071	0.291739	10.7942	3.66589e-27	1.49936e-25
434	ENSG00000125780	TGM3	7053	873.718	-5.19636	0.31275	-16.6176	5.20053e-62	1.83852e-59
435	ENSG00000125820	NKX2-2	4821	2.93476	-3.53785	0.654077	-4.53476	5.76703e-06	2.10399e-05
436	ENSG00000125823	CSTL1	128817	3.53311	-2.27101	0.449092	-5.0325	4.84133e-07	2.0787e-06
437	ENSG00000125851	PCSK2	5126	3.39703	2.69965	0.477393	5.64079	1.69271e-08	8.94213e-08
438	ENSG00000125869	LAMP5	24141	35.1912	-2.84014	0.333044	-4.35589	1.32526e-05	4.56181e-05
439	ENSG00000125878	TCF15	6939	30.7992	-2.29301	0.202289	-11.3178	1.07156e-29	5.62662e-28
440	ENSG00000125888	BANF2	140836	10.1272	-4.64146	0.454891	-10.1993	1.99647e-24	6.16661e-23
441	ENSG00000125965	GDF5	8200	1.49401	-2.13383	0.422195	-4.52993	5.90043e-06	2.15046e-05
442	ENSG00000125999	BPIFB1	92747	17.4523	-2.47046	0.469313	-3.59967	0.000318616	0.000866913
443	ENSG00000126010	GRPR	2925	41.7771	-3.85034	0.396868	-9.3418	9.47081e-21	2.11485e-19
444	ENSG00000126259	KIRREL2	84063	6.56947	-7.36925	0.443295	-6.69875	2.1021e-11	1.62603e-10
445	ENSG00000126562	WNK4	65266	318.13	-3.61552	0.312124	-11.5856	4.87594e-31	2.90652e-29
446	ENSG00000126733	DACH2	117154	7.74136	-4.53055	0.483642	-9.10087	8.96078e-20	1.79749e-18
447	ENSG00000126752	SSX1	6756	381.168	-7.58374	0.576447	-13.2171	6.99389e-40	7.92774e-38
448	ENSG00000126759	CFP	5199	418.12	3.35339	0.212125	15.8064	2.81253e-56	7.78482e-54
449	ENSG00000126778	SIX1	6495	49.3538	-4.74212	0.32749	-14.3206	1.62671e-46	2.75277e-44
450	ENSG00000126787	DLGAP5	9787	251.263	-3.66076	0.198416	-18.4358	6.77485e-76	5.25875e-73
451	ENSG00000126838	PZP	5858	1017.91	4.17673	0.350124	11.9124	1.01996e-32	6.91055e-31
452	ENSG00000126856	PRDM7	11105	7.34422	-3.33766	0.360334	-8.24811	1.60923e-16	2.27832e-15
453	ENSG00000126890	CTAG2	30848	219.666	-5.36456	0.638558	-13.1002	3.28387e-39	3.60781e-37
454	ENSG00000127530	OR7C1	26664	1.39386	-2.58452	0.748833	-2.72809	0.00637019	0.0133451
455	ENSG00000127533	F2RL3	9002	183.515	-2.2704	0.238866	-9.50397	2.02041e-21	4.81259e-20
456	ENSG00000127564	PKMYT1	9088	257.445	-3.12947	0.178521	-17.5224	9.66301e-69	5.30812e-66
457	ENSG00000127585	FBXL16	146330	142.915	-2.32833	0.313969	-7.41657	1.20189e-13	1.22438e-12
458	ENSG00000127743	IL17B	27190	2.86843	-2.51432	0.368364	-6.80459	1.0134e-11	8.18656e-11
459	ENSG00000127863	TNFRSF19	55504	476.736	-2.11854	0.317388	-6.67773	2.42663e-11	1.86054e-10
460	ENSG00000127928	GNGT1	2792	10.5078	-4.25163	0.599946	-7.08826	1.35812e-12	1.22087e-11
461	ENSG00000128016	ZFP36	7538	7567.45	2.15509	0.149879	14.3786	7.05346e-47	1.23456e-44
462	ENSG00000128165	ADM2	79924	739.655	-2.14937	0.203375	-10.5687	4.16092e-26	1.5285e-24
463	ENSG00000128242	GAL3ST1	9514	740.088	-2.41334	0.304126	-7.93863	2.04432e-15	2.56752e-14
464	ENSG00000128250	RFPL1	5988	1.31521	3.84758	0.396484	9.70912	2.75701e-22	7.07197e-21
465	ENSG00000128266	GNAZ	2781	512.617	-3.57578	0.242248	-14.7592	2.68387e-49	5.20816e-47
466	ENSG00000128298	BAIAP2L2	80115	572.185	-2.94328	0.249401	-11.8023	3.79732e-32	2.45629e-30
467	ENSG00000128408	RIBC2	26150	53.8098	-2.90445	0.261213	-11.1001	1.25247e-28	5.93898e-27
468	ENSG00000128564	VGF	7425	44.7886	-2.06064	0.338589	-5.53461	3.11916e-08	1.58628e-07
469	ENSG00000128578	STRIP2	57464	98.3969	-2.59772	0.227152	-11.4293	2.98457e-30	1.65477e-28
470	ENSG00000128591	FLNC	2318	979.035	-3.15672	0.342557	-9.22395	2.8636e-20	6.03587e-19
471	ENSG00000128610	FEZF1	389549	7.14788	-4.47181	0.519233	-7.73802	1.00979e-14	1.17178e-13
472	ENSG00000128645	HOXD1	3231	8.37967	-4.85738	0.468742	-9.79668	1.16343e-22	3.11405e-21
473	ENSG00000128652	HOXD3	3232	4.74034	-3.46825	0.362931	-9.53356	1.51976e-21	3.65664e-20
474	ENSG00000128683	GAD1	2571	39.4811	-4.54286	0.396682	-11.3221	1.01954e-29	5.36138e-28
475	ENSG00000128709	HOXD9	3235	84.5588	-4.48347	0.310926	-14.3499	1.06711e-46	1.82307e-44
476	ENSG00000128710	HOXD10	3236	17.9336	-4.19084	0.431459	-9.54366	1.37878e-21	3.33316e-20
477	ENSG00000128713	HOXD11	3237	1.90108	-3.04105	0.648225	-3.41991	0.000626414	0.00161074
478	ENSG00000128714	HOXD13	3239	2.4582	-2.33391	0.662064	-4.30991	1.6332e-05	5.53799e-05
479	ENSG00000129159	KCNC1	3746	6.58969	-4.84811	0.419479	-9.07048	1.18493e-19	2.3492e-18
480	ENSG00000129173	E2F8	79733	139.49	-3.58146	0.221007	-16.1839	6.54991e-59	2.0515e-56
481	ENSG00000129195	PIMREG	54478	71.842	-3.08038	0.264327	-11.6377	2.6504e-31	1.62324e-29
482	ENSG00000129354	AP1M2	10053	782.983	-2.95431	0.374917	-7.89066	3.006e-15	3.70366e-14
483	ENSG00000129654	FOXJ1	2302	100.093	-3.10151	0.390204	-7.01802	2.2503e-12	1.96309e-11
484	ENSG00000129810	SGO1	151648	124.827	-3.00709	0.189589	-15.8482	1.44578e-56	4.0648e-54
485	ENSG00000129965	INS-IGF2	723961	79.5334	3.78417	0.550949	6.80879	9.84251e-12	7.96367e-11
486	ENSG00000129990	SYT5	6861	11.6699	-2.5665	0.325778	-6.52311	6.88634e-11	4.98952e-10
487	ENSG00000129991	TNNI3	7137	14.0793	-3.32118	0.473649	-7.23418	4.68352e-13	4.45115e-12
488	ENSG00000130032	PRRG3	79057	13.4516	-2.3565	0.23453	-10.0082	1.40251e-23	4.00944e-22
489	ENSG00000130054	FAM155B	27112	72.8938	-2.60632	0.311015	-8.37569	5.49019e-17	8.19878e-16
490	ENSG00000130294	KIF1A	547	181.558	-2.69075	0.381	-5.30616	1.11959e-07	5.27877e-07
491	ENSG00000130300	PLVAP	83483	4405.61	-2.88584	0.137283	-21.0211	4.20211e-98	5.00135e-94
492	ENSG00000130477	UNC13A	23025	46.6355	-3.55545	0.350052	-10.1251	4.27389e-24	1.27702e-22
493	ENSG00000130540	SULT4A1	25830	118.931	-4.16343	0.486937	-8.58287	9.2533e-18	1.49502e-16
494	ENSG00000130595	TNNT3	7140	5.37904	-2.20038	0.264237	-2.55754	0.0105414	0.0210474
495	ENSG00000130598	TNNI2	7136	47.9607	-2.56319	0.241886	-6.73421	1.64825e-11	1.29431e-10
496	ENSG00000130643	CALY	50632	13.5727	-3.98493	0.370305	-8.6069	7.50657e-18	1.22444e-16
497	ENSG00000130675	MNX1	3110	29.2002	-4.23089	0.565579	-7.46828	8.12511e-14	8.41401e-13
498	ENSG00000130720	FIBCD1	84929	20.2417	-5.47845	0.474281	-10.722	8.02386e-27	3.20112e-25
499	ENSG00000130812	ANGPTL6	83854	274.325	2.95388	0.186243	15.8593	1.21249e-56	3.46346e-54
500	ENSG00000130821	SLC6A8	6535	1328.95	-2.85764	0.274215	-10.4244	1.9188e-25	6.61957e-24
501	ENSG00000130822	PNCK	139728	60.6781	-5.65022	0.476144	-10.6565	1.62535e-26	6.26049e-25
502	ENSG00000130829	DUSP9	1852	1149.35	-4.87826	0.311762	-15.6558	3.03259e-55	8.08071e-53
503	ENSG00000130876	SLC7A10	56301	41.0691	-5.72318	0.457562	-9.64666	5.07808e-22	1.27151e-20
504	ENSG00000131050	BPIFA2	140683	9.75355	-5.49128	0.560205	-8.34493	7.1258e-17	1.05268e-15
505	ENSG00000131055	COX4I2	84701	93.0095	-2.81409	0.197046	-14.2701	3.3604e-46	5.63317e-44
506	ENSG00000131094	C1QL1	10882	363.885	-3.79857	0.337563	-11.2588	2.09578e-29	1.07827e-27
507	ENSG00000131095	GFAP	2670	28.7766	-2.26072	0.286448	-3.04683	0.00231269	0.00533029
508	ENSG00000131097	HIGD1B	51751	48.0718	-3.08638	0.176175	-17.4772	2.13649e-68	1.15584e-65
509	ENSG00000131142	CCL25	6370	200.718	-6.56518	0.381928	-10.9956	4.01338e-28	1.80027e-26
510	ENSG00000131650	KREMEN2	79412	18.6789	-2.33787	0.29265	-7.96729	1.62195e-15	2.05512e-14
511	ENSG00000131668	BARX1	56033	18.0649	-2.0226	0.399149	-2.84607	0.00442624	0.00959991
512	ENSG00000131721	RHOXF2	84528	2.62327	-4.00586	0.755731	-3.64974	0.000262508	0.000724005
513	ENSG00000131730	CKMT2	1160	92.992	-2.58432	0.28017	-3.70273	0.000213292	0.000598963
514	ENSG00000131747	TOP2A	7153	1802.29	-3.84498	0.202537	-18.984	2.31421e-80	2.66553e-77
515	ENSG00000131771	PPP1R1B	84152	41.0007	-3.37754	0.394686	-9.21492	3.11518e-20	6.54682e-19
516	ENSG00000131914	LIN28A	79727	1.25807	-4.60081	0.523716	-3.56201	0.00036802	0.000988311
517	ENSG00000132026	RTBDN	83546	27.3362	-5.02127	0.483202	-10.2756	9.07974e-25	2.90503e-23
518	ENSG00000132031	MATN3	4148	69.6867	-5.06807	0.340041	-11.3013	1.29276e-29	6.74846e-28
519	ENSG00000132164	SLC6A11	6538	502.613	-2.29846	0.447409	-5.14977	2.60811e-07	1.16392e-06
520	ENSG00000132429	POPDC3	64208	39.0702	-5.68908	0.559286	-9.68501	3.49171e-22	8.899e-21
521	ENSG00000132446	FTHL17	53940	1.83731	-3.12576	0.845244	-2.6007	0.00930351	0.0188114
522	ENSG00000132518	GUCY2D	3000	37.9208	-2.08364	0.298231	-6.98201	2.90979e-12	2.51202e-11
523	ENSG00000132563	REEP2	51308	52.3732	-2.99222	0.27974	-10.6785	1.2832e-26	4.99107e-25
524	ENSG00000132677	RHBG	57127	2104.97	-2.53693	0.384779	-6.60253	4.04198e-11	3.013e-10
525	ENSG00000132692	BCAN	63827	141.555	-4.49471	0.298194	-15.032	4.53174e-51	1.01131e-48
526	ENSG00000132746	ALDH3B2	222	9.76674	-3.58693	0.524229	-2.81612	0.00486071	0.0104514
527	ENSG00000132749	TESMIN	9633	110.792	-2.28207	0.196691	-11.5973	4.25054e-31	2.54648e-29
528	ENSG00000132932	ATP8A2	51761	12.7259	-3.02251	0.267293	-6.16121	7.21905e-10	4.59881e-09
529	ENSG00000132972	RNF17	56163	16.633	-4.8784	0.618827	-7.08913	1.34953e-12	1.21437e-11
530	ENSG00000133134	BEX2	84707	329.455	-2.48614	0.340616	-7.30345	2.80484e-13	2.73633e-12
531	ENSG00000133216	EPHB2	2048	473.67	-2.41624	0.284174	-8.50468	1.82104e-17	2.85811e-16
532	ENSG00000133454	MYO18B	84700	156.254	-6.6908	0.454702	-14.481	1.59655e-47	2.89373e-45
533	ENSG00000133636	NTS	4922	1210.68	-6.16351	0.514553	-8.07428	6.78747e-16	8.95615e-15
534	ENSG00000133665	DYDC2	84332	92.6045	-3.35731	0.323363	-10.3725	3.30727e-25	1.10882e-23
535	ENSG00000133710	SPINK5	11005	76.4446	-3.14569	0.282461	-11.1218	9.8254e-29	4.70276e-27
536	ENSG00000133800	LYVE1	10894	424.752	2.93115	0.246158	11.9048	1.11736e-32	7.51343e-31
537	ENSG00000133937	GSC	145258	3.40601	-2.83546	0.445536	-5.83433	5.40058e-09	3.04922e-08
538	ENSG00000134042	MRO	83876	143.39	2.3143	0.202161	11.4471	2.43164e-30	1.35875e-28
539	ENSG00000134057	CCNB1	891	910.164	-3.23953	0.173157	-18.7069	4.34918e-78	4.16298e-75
540	ENSG00000134253	TRIM45	80263	170.978	-2.26142	0.168003	-13.457	2.80202e-41	3.5353e-39
541	ENSG00000134323	MYCN	4613	109.788	-3.56462	0.328314	-10.8493	2.00859e-27	8.42756e-26
542	ENSG00000134339	SAA2	6289	27910.6	2.17668	0.408166	5.32509	1.00901e-07	4.78771e-07
543	ENSG00000134443	GRP	2922	2.75733	-3.31501	0.566627	-5.06495	4.08517e-07	1.77711e-06
544	ENSG00000134612	FOLH1B	219595	181.25	2.00081	0.343214	5.82596	5.6786e-09	3.19207e-08
545	ENSG00000134640	MTNR1B	4544	8.77282	-5.33081	0.719391	-5.70956	1.13271e-08	6.1252e-08
546	ENSG00000134668	SPOCD1	90853	24.7863	-2.68518	0.268624	-8.8223	1.12135e-18	2.00494e-17
547	ENSG00000134690	CDCA8	55143	352.584	-3.13054	0.176298	-17.7518	1.66888e-70	1.02739e-67
548	ENSG00000135097	MSI1	4440	320.065	-3.36842	0.327404	-10.2927	7.60415e-25	2.45048e-23
549	ENSG00000135116	HRK	8739	2.31192	-3.08902	0.405868	-2.82847	0.00467717	0.0100972
550	ENSG00000135119	RNFT2	84900	84.5679	-2.67456	0.211122	-12.6577	1.01464e-36	9.1487e-35
551	ENSG00000135127	BICDL1	92558	550.7	-2.23838	0.201745	-11.095	1.3268e-28	6.25822e-27
552	ENSG00000135222	CSN2	1447	2.97681	-3.28154	0.789625	-3.66925	0.000243259	0.00067513
553	ENSG00000135253	KCP	375616	50.9832	-2.92125	0.254169	-10.3643	3.60266e-25	1.20334e-23
554	ENSG00000135312	HTR1B	3351	1.79197	-2.24007	0.392638	-4.71677	2.39623e-06	9.29291e-06
555	ENSG00000135324	MRAP2	112609	174.716	-4.01158	0.304132	-13.1767	1.19458e-39	1.33293e-37
556	ENSG00000135355	GJA10	84694	12.0606	-5.24153	0.666009	-7.17063	7.46548e-13	6.91831e-12
557	ENSG00000135409	AMHR2	269	10.1255	2.85736	0.370112	7.71276	1.23122e-14	1.41311e-13
558	ENSG00000135443	KRT85	3891	16.6383	-2.52099	0.417384	-4.58438	4.55342e-06	1.69024e-05
559	ENSG00000135451	TROAP	10024	382.728	-4.15871	0.207081	-20.0675	1.42093e-89	5.07357e-86
560	ENSG00000135454	B4GALNT1	2583	333.425	-4.12368	0.272841	-15.107	1.45611e-51	3.38557e-49
561	ENSG00000135638	EMX1	2016	75.6725	-3.70638	0.338404	-10.9319	8.11403e-28	3.52028e-26
562	ENSG00000135702	CHST5	23563	2.32239	-3.99498	0.531757	-3.83758	0.000124252	0.000364547
563	ENSG00000135773	CAPN9	10753	19.4661	-2.61631	0.289359	-8.03876	9.07527e-16	1.18091e-14
564	ENSG00000135902	CHRND	1144	8.82869	-5.20712	0.518304	-7.70919	1.26615e-14	1.45227e-13
565	ENSG00000135903	PAX3	5077	1.32672	-2.98322	0.685776	-2.90068	0.00372358	0.00821161
566	ENSG00000136011	STAB2	55576	249.223	4.73785	0.285252	16.598	7.2005e-62	2.5206e-59
567	ENSG00000136231	IGF2BP3	10643	154.671	-4.59621	0.354002	-12.9598	2.06829e-38	2.15936e-36
568	ENSG00000136383	ALPK3	57538	771.493	-2.02653	0.221499	-9.14969	5.70977e-20	1.16699e-18
569	ENSG00000136542	GALNT5	11227	10.4469	-2.09178	0.358087	-2.89578	0.00378217	0.00832795
570	ENSG00000136689	IL1RN	3557	3327.69	2.12629	0.198268	10.7235	7.89175e-27	3.15193e-25
571	ENSG00000136928	GABBR2	9568	125.357	-4.19152	0.41678	-11.0911	1.38562e-28	6.52703e-27
572	ENSG00000136943	CTSV	1515	134.653	-4.40226	0.312419	-11.8102	3.45774e-32	2.24069e-30
573	ENSG00000136982	DSCC1	79075	166.449	-2.05864	0.137579	-14.9599	1.34254e-50	2.87047e-48
574	ENSG00000137135	ARHGEF39	84904	216.117	-2.90655	0.1516	-19.164	7.39958e-82	1.05684e-78
575	ENSG00000137225	CAPN11	11131	26.8784	-2.07971	0.16811	-12.3529	4.69711e-35	3.79445e-33
576	ENSG00000137251	TINAG	27283	216.391	-6.37479	0.52628	-12.8759	6.15239e-38	6.13854e-36
577	ENSG00000137261	KIAA0319	9856	14.9099	-2.05051	0.23412	-5.042	4.60702e-07	1.98646e-06
578	ENSG00000137269	LRRC1	55227	449.212	-2.28861	0.214958	-10.6466	1.80875e-26	6.92951e-25
579	ENSG00000137270	GCM1	8521	4.75538	-3.60225	0.423541	-7.27892	3.36511e-13	3.24918e-12
580	ENSG00000137273	FOXF2	2295	19.1481	-2.43757	0.276472	-7.02658	2.1166e-12	1.85325e-11
581	ENSG00000137310	TCF19	6941	760.999	-2.74167	0.171397	-15.995	1.38476e-57	4.15498e-55
582	ENSG00000137392	CLPS	1208	3.74911	-3.58128	0.867817	-3.1267	0.00176783	0.00416126
583	ENSG00000137473	TTC29	83894	0.85976	-3.2778	0.569829	-2.70683	0.00679295	0.0141395
584	ENSG00000137558	PI15	51050	72.3768	-3.92228	0.34237	-10.4066	2.31455e-25	7.92361e-24
585	ENSG00000137672	TRPC6	7225	37.7427	-2.05714	0.167513	-12.2672	1.35839e-34	1.04984e-32
586	ENSG00000137745	MMP13	4322	2.2204	-3.99265	0.587043	-4.08782	4.35455e-05	0.000137754
587	ENSG00000137804	NUSAP1	51203	947.51	-2.2347	0.156756	-14.2556	4.14004e-46	6.84371e-44
588	ENSG00000137807	KIF23	9493	270.264	-3.25088	0.198177	-16.3966	2.02198e-60	6.94199e-58
589	ENSG00000137825	ITPKA	3706	372.333	-2.5357	0.219431	-11.5552	6.94611e-31	4.07254e-29
590	ENSG00000137857	DUOX1	53905	160.018	-2.24804	0.228787	-9.8243	8.84862e-23	2.39355e-21
591	ENSG00000137868	STRA6	64220	34.0865	-3.62338	0.367148	-9.36114	7.88807e-21	1.78148e-19
592	ENSG00000137869	CYP19A1	1588	31.2678	-6.53744	0.446294	-10.1962	2.06175e-24	6.35176e-23
593	ENSG00000137948	BRDT	676	6.2002	-4.56294	0.613697	-5.41571	6.10466e-08	2.99249e-07
594	ENSG00000137968	SLC44A5	204962	204.758	-2.22889	0.352392	-6.3289	2.46913e-10	1.66802e-09
595	ENSG00000138083	SIX3	6496	3.05119	-2.90601	0.617161	-3.82761	0.000129394	0.00037845
596	ENSG00000138100	TRIM54	57159	61.9655	-4.13781	0.379982	-10.3231	5.53999e-25	1.8007e-23
597	ENSG00000138115	CYP2C8	1558	21769	2.63285	0.270317	9.73678	2.10107e-22	5.44023e-21
598	ENSG00000138136	LBX1	10660	1.24926	-2.05439	0.759991	-2.42474	0.0153194	0.029451
599	ENSG00000138160	KIF11	3832	351.176	-2.17161	0.159974	-13.5734	5.76257e-42	7.56465e-40
600	ENSG00000138161	CUZD1	50624	13.4139	-3.7309	0.202562	-7.48942	6.91767e-14	7.22863e-13
601	ENSG00000138180	CEP55	55165	169.297	-3.01461	0.207077	-14.5494	5.89537e-48	1.08505e-45
602	ENSG00000138315	OIT3	170392	1063.55	3.24661	0.183273	17.7133	3.31263e-70	2.00476e-67
603	ENSG00000138435	CHRNA1	1134	6.78745	-2.37597	0.343526	-3.56709	0.000360964	0.00097095
604	ENSG00000138587	MNS1	55329	241.942	-2.61732	0.275184	-9.51126	1.88363e-21	4.50481e-20
605	ENSG00000138653	NDST4	64579	1.01751	-2.54841	0.669168	-2.20544	0.0274236	0.0495699
606	ENSG00000138778	CENPE	1062	220.007	-3.10484	0.184269	-16.8408	1.22635e-63	4.75957e-61
607	ENSG00000138795	LEF1	51176	289.017	-2.90595	0.245244	-11.8474	2.22005e-32	1.46523e-30
608	ENSG00000138798	EGF	1950	55.1382	-4.42107	0.466418	-9.44958	3.40199e-21	7.9421e-20
609	ENSG00000139055	ERP27	121506	53.4619	-2.25956	0.272974	-5.16846	2.36029e-07	1.06035e-06
610	ENSG00000139155	SLCO1C1	53919	10.7776	-3.99937	0.308601	-12.1377	6.67103e-34	4.89109e-32
611	ENSG00000139219	COL2A1	1280	374.96	-8.27289	0.535071	-13.2785	3.08456e-40	3.59926e-38
612	ENSG00000139289	PHLDA1	22822	4593.27	2.46747	0.188758	13.0712	4.80878e-39	5.18738e-37
613	ENSG00000139364	TMEM132B	114795	15.1449	-2.64179	0.282874	-6.02988	1.64079e-09	9.96486e-09
614	ENSG00000139445	FOXN4	121643	149.869	-2.2848	0.360658	-6.3387	2.31713e-10	1.57262e-09
615	ENSG00000139734	DIAPH3	81624	147.295	-3.63277	0.214099	-15.5542	1.49043e-54	3.88447e-52
616	ENSG00000139767	SRRM4	84530	1.77369	-2.22232	0.462044	-4.4002	1.08149e-05	3.77772e-05
617	ENSG00000139800	ZIC5	85416	87.2345	-6.32955	0.415345	-14.8659	5.4856e-50	1.11925e-47
618	ENSG00000139880	CDH24	64403	144.05	-2.16604	0.162148	-13.3546	1.1133e-40	1.35209e-38
619	ENSG00000139914	FITM1	161247	127.296	2.04731	0.221104	9.25879	2.06759e-20	4.42333e-19
620	ENSG00000139915	MDGA2	161357	26.8651	-2.52766	0.529105	-4.79529	1.62443e-06	6.45039e-06
621	ENSG00000140015	KCNH5	27133	5.17666	-3.95299	0.641156	-5.36231	8.21664e-08	3.95235e-07
622	ENSG00000140107	SLC25A47	283600	8622.44	2.56897	0.337447	7.60712	2.80269e-14	3.07633e-13
623	ENSG00000140274	DUOXA2	405753	133.217	-3.66235	0.451679	-7.17943	7.00021e-13	6.52439e-12
624	ENSG00000140279	DUOX2	50506	559.933	-3.60881	0.417143	-7.56084	4.0048e-14	4.31489e-13
625	ENSG00000140297	GCNT3	9245	323.338	-2.46022	0.321864	-9.07633	1.12294e-19	2.23755e-18
626	ENSG00000140451	PIF1	80119	119.508	-2.71139	0.192071	-14.1076	3.40979e-45	5.45963e-43
627	ENSG00000140505	CYP1A2	1544	7018.06	3.07432	0.44666	6.86265	6.75941e-12	5.57522e-11
628	ENSG00000140525	FANCI	55215	534.604	-2.24135	0.150387	-14.9028	3.15878e-50	6.63456e-48
629	ENSG00000140534	TICRR	90381	108.701	-3.60372	0.21284	-16.9017	4.37433e-64	1.77488e-61
630	ENSG00000140600	SH3GL3	6457	21.9469	-5.17953	0.631577	-6.08556	1.16084e-09	7.19725e-09
631	ENSG00000140807	NKD1	85407	1481.35	-3.69402	0.366641	-10.0912	6.04441e-24	1.78071e-22
632	ENSG00000140873	ADAMTS18	170692	13.1954	-3.00768	0.376555	-7.93018	2.18823e-15	2.73862e-14
633	ENSG00000140945	CDH13	1012	396.092	-2.30397	0.138039	-16.6887	1.58285e-62	5.76705e-60
634	ENSG00000141314	RHBDL3	162494	71.057	-4.04238	0.357222	-10.2125	1.744e-24	5.4102e-23
635	ENSG00000141576	RNF157	114804	742.407	-2.51239	0.220951	-11.3713	5.80965e-30	3.13353e-28
636	ENSG00000141744	PNMT	5409	14.0523	-2.67505	0.392507	-4.78568	1.70408e-06	6.74265e-06
637	ENSG00000141750	STAC2	342667	3.22415	-3.08206	0.447383	-4.46438	8.03e-06	2.86519e-05
638	ENSG00000141934	PLPP2	8612	1021.66	-2.02057	0.333738	-6.05784	1.37961e-09	8.46687e-09
639	ENSG00000141977	CIB3	117286	1.73301	-2.24116	0.417142	-4.75811	1.95411e-06	7.66826e-06
640	ENSG00000142319	SLC6A3	6531	7.29121	-4.60371	0.474142	-5.71851	1.07462e-08	5.83405e-08
641	ENSG00000142449	FBN3	84467	89.3342	-3.30556	0.340127	-9.01339	1.99779e-19	3.8768e-18
642	ENSG00000142513	ACP4	93650	15.0395	-3.97424	0.380531	-9.07112	1.178e-19	2.33858e-18
643	ENSG00000142515	KLK3	354	26.0652	-2.787	0.806305	-6.79805	1.06043e-11	8.54324e-11
644	ENSG00000142583	SLC2A5	6518	397.383	-4.13734	0.338798	-12.2174	2.50924e-34	1.91034e-32
645	ENSG00000142619	PADI3	51702	12.8366	-7.14547	0.547116	-7.95637	1.77159e-15	2.23363e-14
646	ENSG00000142621	FHAD1	114827	35.9385	-2.11692	0.242401	-8.72362	2.69438e-18	4.61639e-17
647	ENSG00000142627	EPHA2	1969	1474.57	2.08189	0.166677	12.4901	8.45128e-36	7.15075e-34
648	ENSG00000142731	PLK4	10733	115.317	-2.09145	0.162148	-12.8939	4.86893e-38	4.89718e-36
649	ENSG00000142748	FCN3	8547	1322.98	3.98424	0.296824	13.4137	5.02914e-41	6.19209e-39
650	ENSG00000142789	CELA3A	10136	2.90292	-5.39186	0.539183	-5.58334	2.3594e-08	1.21935e-07
651	ENSG00000142945	KIF2C	11004	419.25	-3.88197	0.20299	-19.1144	1.91701e-81	2.53514e-78
652	ENSG00000142959	BEST4	266675	18.3364	-2.25334	0.243997	-9.21186	3.20521e-20	6.72416e-19
653	ENSG00000143001	TMEM61	199964	16.7731	-2.26445	0.340257	-6.63988	3.13933e-11	2.37385e-10
654	ENSG00000143006	DMRTB1	63948	1.03217	-4.2749	0.715408	-2.59499	0.00945945	0.0191008
655	ENSG00000143061	IGSF3	3321	634.731	-2.50856	0.223352	-11.2317	2.84845e-29	1.44675e-27
656	ENSG00000143125	PROK1	84432	13.9248	-4.24831	0.391953	-4.87819	1.07066e-06	4.36006e-06
657	ENSG00000143194	MAEL	84944	39.866	-3.82795	0.334928	-6.62096	3.56882e-11	2.67819e-10
658	ENSG00000143195	ILDR2	387597	306.35	-2.22089	0.28731	-7.73154	1.06254e-14	1.2274e-13
659	ENSG00000143228	NUF2	83540	269.663	-4.13603	0.204831	-20.1697	1.80779e-90	8.06861e-87
660	ENSG00000143369	ECM1	1893	713.975	3.03499	0.190591	15.9228	4.40202e-57	1.27787e-54
661	ENSG00000143387	CTSK	1513	424.709	-2.02568	0.186287	-3.83722	0.000124434	0.000365051
662	ENSG00000143469	SYT14	255928	1.71946	-4.00155	0.540184	-2.49013	0.0127696	0.0249769
663	ENSG00000143476	DTL	51514	464.967	-3.21769	0.187261	-17.1791	3.80499e-66	1.86111e-63
664	ENSG00000143494	VASH2	79805	102.058	-2.33834	0.229731	-10.1741	2.58795e-24	7.90464e-23
665	ENSG00000143512	HHIPL2	79802	133.322	-6.13066	0.3961	-13.8064	2.33314e-43	3.30584e-41
666	ENSG00000143590	EFNA3	1944	136.671	-2.08947	0.194703	-10.7291	7.4277e-27	2.97658e-25
667	ENSG00000143595	AQP10	89872	21.0772	-4.16164	0.495345	-7.31728	2.53057e-13	2.48642e-12
668	ENSG00000143847	PPFIA4	8497	31.9455	-2.5004	0.308449	-7.68401	1.54183e-14	1.74604e-13
669	ENSG00000143858	SYT2	127833	13.2411	-2.09168	0.247813	-4.27484	1.91276e-05	6.41707e-05
670	ENSG00000143954	REG3G	130120	6.83782	-4.75834	0.816071	-4.34363	1.40147e-05	4.80675e-05
671	ENSG00000144045	DQX1	165545	94.7313	-5.64483	0.467443	-11.9644	5.45742e-33	3.75458e-31
672	ENSG00000144057	ST6GAL2	84620	68.4019	2.06867	0.312885	6.60885	3.87322e-11	2.89325e-10
673	ENSG00000144285	SCN1A	6323	7.45952	-2.73097	0.489533	-3.84801	0.000119083	0.000350418
674	ENSG00000144354	CDCA7	83879	182.354	-3.61152	0.307407	-11.7429	7.68518e-32	4.90013e-30
675	ENSG00000144355	DLX1	1745	9.80038	-5.10829	0.455658	-8.52847	1.48292e-17	2.35225e-16
676	ENSG00000144407	PTH2R	5746	230.778	-3.33871	0.448225	-7.47196	7.90098e-14	8.20094e-13
677	ENSG00000144452	ABCA12	26154	6.9814	-2.46162	0.337801	-4.01222	6.01495e-05	0.000185964
678	ENSG00000144554	FANCD2	2177	318.941	-2.1825	0.158736	-13.7476	5.26658e-43	7.31707e-41
679	ENSG00000144583	MARCHF4	57574	8.30257	-3.71076	0.32637	-11.2135	3.50084e-29	1.75317e-27
680	ENSG00000144655	CSRNP1	64651	1968.95	2.24573	0.137754	16.3022	9.52188e-60	3.17746e-57
681	ENSG00000144820	ADGRG7	84873	266.358	2.6532	0.251559	10.5447	5.37574e-26	1.95465e-24
682	ENSG00000144834	TAGLN3	29114	1.3586	-2.08851	0.470355	-4.44006	8.99332e-06	3.18409e-05
683	ENSG00000145040	UCN2	90226	4.84267	-3.65362	0.44065	-8.29171	1.11633e-16	1.60208e-15
684	ENSG00000145087	STXBP5L	9515	1.78377	-2.28094	0.53999	-3.79684	0.000146555	0.000424507
685	ENSG00000145107	TM4SF19	116211	11.8236	-2.31752	0.312911	-5.92896	3.04862e-09	1.77866e-08
686	ENSG00000145198	VWA5B2	90113	15.5551	-2.3267	0.261877	-6.77732	1.22425e-11	9.77702e-11
687	ENSG00000145242	EPHA5	2044	2.65685	-3.37724	0.663234	-3.21586	0.00130054	0.0031436
688	ENSG00000145244	CORIN	10699	41.7913	-2.11629	0.285772	-6.75548	1.4236e-11	1.12632e-10
689	ENSG00000145248	SLC10A4	201780	2.98043	-2.19615	0.359952	-4.68095	2.85552e-06	1.09386e-05
690	ENSG00000145287	PLAC8	51316	149.827	2.2341	0.264189	8.45455	2.80164e-17	4.29706e-16
691	ENSG00000145358	DDIT4L	115265	21.9918	-2.33078	0.246225	-3.97824	6.94284e-05	0.000212645
692	ENSG00000145386	CCNA2	890	553.479	-3.44263	0.211562	-16.2697	1.62013e-59	5.21158e-57
693	ENSG00000145526	CDH18	1016	3.5708	-2.92188	0.615901	-3.4341	0.000594534	0.00153562
694	ENSG00000145536	ADAMTS16	170690	140.741	-3.53086	0.370373	-9.15253	5.56131e-20	1.13795e-18
695	ENSG00000145681	HAPLN1	1404	9.28406	-4.71231	0.448358	-6.67046	2.55005e-11	1.95009e-10
696	ENSG00000145708	CRHBP	1393	646.546	4.34235	0.31226	13.8934	6.94246e-44	9.99546e-42
697	ENSG00000145721	LIX1	167410	3.08581	-4.51395	0.604949	-4.79033	1.66503e-06	6.59768e-06
698	ENSG00000145777	TSLP	85480	125.814	2.29914	0.273646	8.39965	4.47822e-17	6.7326e-16
699	ENSG00000145808	ADAMTS19	171019	1.53793	-2.05242	0.650535	-2.505	0.0122451	0.0240524
700	ENSG00000145824	CXCL14	9547	418.833	3.41189	0.375864	9.06327	1.26601e-19	2.49886e-18
701	ENSG00000145850	TIMD4	91937	78.6059	3.36573	0.30942	10.8704	1.59474e-27	6.76266e-26
702	ENSG00000145908	ZNF300	91975	109.177	-2.01322	0.218258	-9.22158	2.92743e-20	6.1595e-19
703	ENSG00000145920	CPLX2	10814	2414.73	-8.39013	0.490499	-16.9595	1.63792e-64	6.8004e-62
704	ENSG00000146054	TRIM7	81786	54.5224	-2.49091	0.235479	-10.5672	4.22818e-26	1.55161e-24
705	ENSG00000146151	HMGCLL1	54511	8.49082	2.26341	0.282929	9.77514	1.43963e-22	3.81899e-21
706	ENSG00000146215	CRIP3	401262	336.34	-2.10858	0.192356	-10.9612	5.87051e-28	2.59421e-26
707	ENSG00000146233	CYP39A1	51302	1085.5	2.3956	0.285471	8.38874	4.91373e-17	7.36759e-16
708	ENSG00000146276	GABRR1	2569	1.76401	-2.53781	0.488712	-4.83524	1.32982e-06	5.34233e-06
709	ENSG00000146352	CLVS2	134829	21.8132	-4.16838	0.633307	-4.82772	1.38108e-06	5.54013e-06
710	ENSG00000146410	MTFR2	113115	66.6746	-2.97941	0.19799	-15.0237	5.13857e-51	1.13258e-48
711	ENSG00000146670	CDCA5	113130	526.156	-3.39476	0.174676	-19.4298	4.31976e-84	8.11797e-81
712	ENSG00000146755	TRIM50	135892	280.082	-5.10898	0.406983	-12.5597	3.51486e-36	3.08358e-34
713	ENSG00000146809	ASB15	142685	3.26593	-4.03413	0.449729	-5.40188	6.59464e-08	3.21537e-07
714	ENSG00000146857	STRA8	346673	10.0699	-3.82349	0.441903	-8.54501	1.2852e-17	2.05046e-16
715	ENSG00000147003	CLTRN	57393	347.841	2.41237	0.26232	9.19401	3.78462e-20	7.88412e-19
716	ENSG00000147113	DIPK2B	79742	426.3	-2.18822	0.120303	-18.1874	6.49053e-74	4.82814e-71
717	ENSG00000147145	LPAR4	2846	2.55197	-2.18585	0.349171	-6.22847	4.71007e-10	3.07118e-09
718	ENSG00000147206	NXF3	56000	13.844	2.86809	0.296253	9.67862	3.71709e-22	9.4397e-21
719	ENSG00000147246	HTR2C	3358	3.38364	-3.1746	0.661633	-4.02479	5.70267e-05	0.000176922
720	ENSG00000147255	IGSF1	3547	312.119	-2.28314	0.299557	-6.66776	2.59739e-11	1.98422e-10
721	ENSG00000147257	GPC3	2719	29235	-5.76555	0.298707	-19.3227	3.45903e-83	6.1754e-80
722	ENSG00000147262	GPR119	139760	1.76749	-2.36942	0.655567	-3.3978	0.00067929	0.00173496
723	ENSG00000147378	FATE1	89885	18.9182	-4.39428	0.322833	-13.3429	1.30298e-40	1.57709e-38
724	ENSG00000147381	MAGEA4	4103	16.3577	-4.22621	0.792376	-4.48111	7.42562e-06	2.66579e-05
725	ENSG00000147465	STAR	6770	9.15572	-2.6289	0.32901	-3.92274	8.75476e-05	0.00026364
726	ENSG00000147485	PXDNL	137902	23.1758	-2.84657	0.222809	-11.5729	5.65672e-31	3.34957e-29
727	ENSG00000147509	RGS20	8601	8.17	-2.51091	0.333049	-7.47881	7.49974e-14	7.80262e-13
728	ENSG00000147614	ATP6V0D2	245972	40.0984	-2.85958	0.322011	-7.68698	1.5065e-14	1.70765e-13
729	ENSG00000147697	GSDMC	56169	18.4545	-3.82441	0.318967	-10.4833	1.03038e-25	3.65349e-24
730	ENSG00000147889	CDKN2A	1029	687.478	-3.98769	0.223894	-17.8068	6.26066e-71	3.99184e-68
731	ENSG00000148344	PTGES	9536	229.221	-2.62639	0.334372	-7.85828	3.89454e-15	4.7347e-14
732	ENSG00000148346	LCN2	3934	10117.2	-4.53221	0.361602	-12.5586	3.568e-36	3.12252e-34
733	ENSG00000148408	CACNA1B	774	2.82068	-3.0069	0.477205	-4.30058	1.7035e-05	5.76049e-05
734	ENSG00000148488	ST8SIA6	338596	9.55291	2.38836	0.277882	8.59452	8.36154e-18	1.35708e-16
735	ENSG00000148513	ANKRD30A	91074	2.35294	-2.61147	0.507726	-4.04445	5.2446e-05	0.000163647
736	ENSG00000148704	VAX1	11023	1.15834	-2.45976	0.688866	-2.42405	0.0153484	0.0295035
737	ENSG00000148735	PLEKHS1	79949	17.5063	-3.57933	0.363975	-5.82969	5.553e-09	3.12737e-08
738	ENSG00000148773	MKI67	4288	1314.83	-3.3107	0.192657	-17.1841	3.49573e-66	1.73359e-63
739	ENSG00000148795	CYP17A1	1586	3246.67	-4.02108	0.368165	-10.942	7.25428e-28	3.16652e-26
740	ENSG00000148848	ADAM12	8038	105.747	-2.23145	0.268584	-6.32413	2.54656e-10	1.71821e-09
741	ENSG00000149021	SCGB1A1	7356	1.26656	-4.92113	0.566043	-3.55789	0.000373844	0.00100221
742	ENSG00000149043	SYT8	90019	91.3922	-3.0888	0.37756	-6.15959	7.29354e-10	4.64212e-09
743	ENSG00000149305	HTR3B	9177	2.07571	-2.69716	0.575707	-4.68461	2.80488e-06	1.07597e-05
744	ENSG00000149403	GRIK4	2900	35.3265	-2.51803	0.325848	-7.71755	1.18589e-14	1.36283e-13
745	ENSG00000149452	SLC22A8	9376	10.375	-6.38757	0.550757	-8.13801	4.01826e-16	5.42648e-15
746	ENSG00000149488	TMC2	117532	2.73836	-2.96896	0.358236	-7.60063	2.94682e-14	3.22264e-13
747	ENSG00000149506	ZP1	22917	2.44631	-2.26129	0.401376	-5.61651	1.94854e-08	1.02045e-07
748	ENSG00000149527	PLCH2	9651	493.491	-2.09921	0.309687	-6.78109	1.19277e-11	9.54452e-11
749	ENSG00000149609	C20orf144	128864	5.39172	-2.33027	0.271992	-8.48756	2.11025e-17	3.28316e-16
750	ENSG00000149654	CDH22	64405	32.1511	-4.03962	0.537901	-5.84535	5.05509e-09	2.86549e-08
751	ENSG00000149716	LTO1	220064	453.747	-2.03435	0.144236	-7.05689	1.70271e-12	1.50898e-11
752	ENSG00000149926	TLCD3B	83723	11.2013	-3.89969	0.340416	-11.262	2.02093e-29	1.04276e-27
753	ENSG00000149948	HMGA2	8091	49.7248	-5.4799	0.463141	-8.92818	4.33069e-19	8.14709e-18
754	ENSG00000150394	CDH8	1006	9.74094	-3.62849	0.373923	-9.57506	1.01797e-21	2.4947e-20
755	ENSG00000150551	LYPD1	116372	297.264	-3.96899	0.314042	-12.6369	1.32162e-36	1.1827e-34
756	ENSG00000150625	GPM6A	2823	117.063	3.06705	0.288249	10.6355	2.03754e-26	7.74785e-25
757	ENSG00000150656	CNDP1	84735	765.905	3.1599	0.365888	8.625	6.40945e-18	1.05415e-16
758	ENSG00000150750	C11orf53	341032	6.54068	-2.5211	0.616362	-2.45671	0.0140214	0.0271753
759	ENSG00000150893	FREM2	341640	202.807	2.13891	0.444719	4.79976	1.58854e-06	6.3184e-06
760	ENSG00000151012	SLC7A11	23657	333.671	-4.18308	0.303229	-13.7901	2.92528e-43	4.11221e-41
761	ENSG00000151025	GPR158	57512	138.992	-3.30581	0.295683	-11.1744	5.44233e-29	2.68403e-27
762	ENSG00000151572	ANO4	121601	12.1065	-2.09307	0.302786	-5.81589	6.03127e-09	3.3802e-08
763	ENSG00000151725	CENPU	79682	411.906	-2.15253	0.161839	-13.2994	2.33227e-40	2.73935e-38
764	ENSG00000151789	ZNF385D	79750	139.396	-3.71721	0.350554	-8.91914	4.6992e-19	8.81248e-18
765	ENSG00000151834	GABRA2	2555	36.8312	-4.42904	0.630791	-6.72988	1.69808e-11	1.32964e-10
766	ENSG00000152128	TMEM163	81615	80.1761	-3.28921	0.336827	-5.94048	2.84187e-09	1.66539e-08
767	ENSG00000152253	SPC25	57405	133.742	-3.10169	0.181246	-17.0984	1.52563e-65	6.98384e-63
768	ENSG00000152377	SPOCK1	6695	187.008	-4.32847	0.342303	-12.2858	1.07989e-34	8.41891e-33
769	ENSG00000152583	SPARCL1	8404	6626.49	-2.67354	0.266086	-10.0507	9.12304e-24	2.65051e-22
770	ENSG00000152595	MEPE	56955	2.69891	-2.06873	0.412387	-4.46065	8.17131e-06	2.91182e-05
771	ENSG00000152669	CCNO	10309	74.0774	-3.11974	0.326684	-9.54046	1.42206e-21	3.43546e-20
772	ENSG00000152670	DDX4	54514	2.00455	-2.23126	0.449914	-4.12938	3.6374e-05	0.00011667
773	ENSG00000152760	TCTEX1D1	200132	69.076	2.05134	0.282767	7.25275	4.08397e-13	3.89587e-12
774	ENSG00000152910	CNTNAP4	85445	62.6644	-4.16085	0.486536	-8.55832	1.14519e-17	1.83776e-16
775	ENSG00000152931	PART1	25859	27.2614	-6.30272	0.583133	-8.86863	7.40513e-19	1.35594e-17
776	ENSG00000152954	NRSN1	140767	2.40809	-2.96285	0.531064	-4.31253	1.61397e-05	5.47953e-05
777	ENSG00000153292	ADGRF1	266977	12.8156	-2.41601	0.472587	-2.73653	0.00620914	0.0130376
778	ENSG00000153294	ADGRF4	221393	5.16975	-2.14658	0.527995	-3.07734	0.00208859	0.00485137
779	ENSG00000153404	PLEKHG4B	153478	39.7818	-2.9111	0.370185	-7.36846	1.72607e-13	1.72927e-12
780	ENSG00000153779	TGIF2LX	90316	3.6362	-3.33386	0.630323	-5.28779	1.238e-07	5.80639e-07
781	ENSG00000153930	ANKFN1	162282	70.7556	-7.05323	0.601412	-9.73961	2.04342e-22	5.30636e-21
782	ENSG00000154040	CABYR	26256	295.113	-4.12043	0.324617	-12.6923	6.52282e-37	5.94142e-35
783	ENSG00000154096	THY1	7070	2166.98	-2.52307	0.161259	-15.6462	3.52777e-55	9.33057e-53
784	ENSG00000154143	PANX3	116337	1.23545	-2.24321	0.564014	-3.63118	0.000282131	0.000773895
785	ENSG00000154153	RETREG1	54463	1019.22	2.24075	0.284024	7.88672	3.10227e-15	3.81569e-14
786	ENSG00000154162	CDH12	1010	31.2225	-4.72056	0.615818	-5.86861	4.39472e-09	2.51109e-08
787	ENSG00000154277	UCHL1	7345	240.066	-4.63959	0.340283	-9.66536	4.23118e-22	1.06769e-20
788	ENSG00000154342	WNT3A	89780	26.254	-7.19259	0.530535	-10.142	3.59508e-24	1.07961e-22
789	ENSG00000154611	PSMA8	143471	1.71496	-2.75358	0.525882	-2.75959	0.0057874	0.0122398
790	ENSG00000154645	CHODL	140578	15.3114	-3.70418	0.3826	-5.88971	3.86867e-09	2.22511e-08
791	ENSG00000154646	TMPRSS15	5651	23.3901	-6.95942	0.665636	-8.24357	1.67147e-16	2.35802e-15
792	ENSG00000154678	PDE1C	5137	32.1889	-2.54892	0.245396	-8.68932	3.64613e-18	6.16716e-17
793	ENSG00000154839	SKA1	220134	220.12	-4.40271	0.217825	-20.1754	1.61188e-90	8.06861e-87
794	ENSG00000154920	EME1	146956	99.2678	-3.19849	0.187483	-17.0382	4.28003e-65	1.8867e-62
795	ENSG00000154928	EPHB1	2047	50.5418	2.02928	0.21056	9.63734	5.5611e-22	1.38469e-20
796	ENSG00000154975	CA10	56934	1.84578	-2.61838	0.450596	-4.65691	3.20997e-06	1.22152e-05
797	ENSG00000154997	SEPTIN14	346288	5.852	-4.92876	0.654017	-5.35018	8.78646e-08	4.20944e-07
798	ENSG00000155052	CNTNAP5	129684	1.33175	-2.81142	0.5846	-3.73573	0.00018717	0.000531628
799	ENSG00000155495	MAGEC1	9947	174.348	-7.07179	0.627226	-11.6345	2.75158e-31	1.68233e-29
800	ENSG00000155666	KDM8	79831	1332.46	2.39737	0.216683	11.0627	1.90254e-28	8.84532e-27
801	ENSG00000155816	FMN2	56776	6.6052	-3.29492	0.488087	-4.09423	4.23582e-05	0.000134248
802	ENSG00000155897	ADCY8	114	33.7095	-2.69778	0.525883	-4.03464	5.46855e-05	0.000170087
803	ENSG00000155966	AFF2	2334	23.9099	-4.60275	0.394218	-8.4754	2.34271e-17	3.6243e-16
804	ENSG00000155980	KIF5A	3798	10.4103	-3.02301	0.370871	-8.069	7.08789e-16	9.3422e-15
805	ENSG00000156006	NAT2	10	587.231	2.87196	0.308585	9.30142	1.38579e-20	3.02821e-19
806	ENSG00000156009	MAGEA8	4107	14.3198	-6.09335	0.579585	-8.15634	3.45316e-16	4.70606e-15
807	ENSG00000156076	WIF1	11197	7.77789	-4.69391	0.607039	-5.03774	4.71059e-07	2.02695e-06
808	ENSG00000156150	ALX3	257	7.7367	-4.33547	0.628251	-6.89894	5.23932e-12	4.38834e-11
809	ENSG00000156269	NAA11	84779	32.4341	-5.82515	0.71383	-10.2313	1.43556e-24	4.4924e-23
810	ENSG00000156395	SORCS3	22986	3.62089	-2.38657	0.666604	-2.88584	0.00390365	0.00856864
811	ENSG00000156509	FBXO43	286151	58.1074	-3.96761	0.218257	-18.0923	3.66708e-73	2.67218e-70
812	ENSG00000156535	CD109	135228	572.474	-2.41849	0.228098	-10.6032	2.87889e-26	1.08204e-24
813	ENSG00000156564	LRFN2	57497	7.82374	-2.19919	0.393505	-5.56566	2.61166e-08	1.34253e-07
814	ENSG00000156687	UNC5D	137970	11.4275	-4.74041	0.57904	-5.24923	1.52737e-07	7.06339e-07
815	ENSG00000156959	LHFPL4	375323	47.2595	-4.17051	0.49635	-8.39649	4.60003e-17	6.91283e-16
816	ENSG00000156970	BUB1B	701	258.724	-3.46467	0.20175	-17.163	5.0234e-66	2.42386e-63
817	ENSG00000157005	SST	6750	4.49644	-4.64703	0.808878	-3.40499	0.000661667	0.00169443
818	ENSG00000157064	NMNAT2	23057	21.8763	-2.38412	0.261027	-5.67957	1.35033e-08	7.23732e-08
819	ENSG00000157330	C1orf158	93190	2.75786	-3.50676	0.56539	-4.7891	1.67534e-06	6.63412e-06
820	ENSG00000157445	CACNA2D3	55799	30.4184	-2.05447	0.272522	-5.44313	5.23532e-08	2.58337e-07
821	ENSG00000157456	CCNB2	9133	421.649	-3.67844	0.190552	-19.296	5.80329e-83	9.86724e-80
822	ENSG00000157470	FAM81A	145773	48.158	-2.05997	0.231414	-8.8952	5.83129e-19	1.07882e-17
823	ENSG00000157542	KCNJ6	3763	18.1792	-4.21655	0.423015	-7.39502	1.41385e-13	1.43174e-12
824	ENSG00000157613	CREB3L1	90993	238.697	-2.29402	0.272923	-6.79666	1.0707e-11	8.61624e-11
825	ENSG00000157680	DGKI	9162	21.1138	-2.28066	0.202755	-10.5797	3.70072e-26	1.36789e-24
826	ENSG00000157703	SVOPL	136306	2.08548	-2.1896	0.428577	-3.67102	0.000241583	0.000671072
827	ENSG00000157766	ACAN	176	76.8584	-3.52012	0.309884	-11.3406	8.2557e-30	4.38658e-28
828	ENSG00000157833	GAREM2	150946	110.786	-2.14425	0.224054	-9.56741	1.09612e-21	2.68437e-20
829	ENSG00000157851	DPYSL5	56896	1.74066	-3.72764	0.521906	-4.50561	6.6183e-06	2.39474e-05
830	ENSG00000157856	DRC1	92749	7.81373	-2.25569	0.294097	-7.62303	2.47789e-14	2.73918e-13
831	ENSG00000158008	EXTL1	2134	11.5832	-2.51501	0.302148	-7.84074	4.47888e-15	5.39915e-14
832	ENSG00000158014	SLC30A2	7780	101.712	-2.87843	0.384909	-6.47531	9.46187e-11	6.72865e-10
833	ENSG00000158164	TMSB15A	11013	5.29539	-2.20826	0.256929	-5.50849	3.61924e-08	1.82368e-07
834	ENSG00000158220	ESYT3	83850	47.357	-2.17062	0.267195	-7.26685	3.67959e-13	3.53562e-12
835	ENSG00000158270	COLEC12	81035	154.533	-2.37886	0.272682	-7.60606	2.82576e-14	3.09975e-13
836	ENSG00000158402	CDC25C	995	194.878	-4.2851	0.209475	-20.4182	1.15177e-92	8.22499e-89
837	ENSG00000158406	H4C8	8365	51.358	-2.54724	0.246412	-10.325	5.43438e-25	1.77205e-23
838	ENSG00000158458	NRG2	9542	59.3422	-2.27524	0.274523	-8.28282	1.2029e-16	1.72285e-15
839	ENSG00000158486	DNAH3	55567	8.91449	-2.2638	0.318286	-5.97321	2.32624e-09	1.38135e-08
840	ENSG00000158516	CPA2	1358	14.2952	-7.45091	0.602725	-6.86715	6.54978e-12	5.41483e-11
841	ENSG00000158525	CPA5	93979	6.74912	-2.35308	0.347268	-5.74282	9.31118e-09	5.09213e-08
842	ENSG00000158560	DYNC1I1	1780	255.407	-3.70036	0.329857	-11.2198	3.25883e-29	1.63887e-27
843	ENSG00000158639	PAGE5	90737	102.35	-3.69984	0.411654	-6.74793	1.49973e-11	1.18393e-10
844	ENSG00000158815	FGF17	8822	11.0609	-3.2613	0.309785	-7.02552	2.13263e-12	1.86446e-11
845	ENSG00000158865	SLC5A11	115584	118.933	-2.30662	0.303961	-7.58875	3.23006e-14	3.51302e-13
846	ENSG00000158887	MPZ	4359	670.243	-2.90235	0.295413	-9.82834	8.50121e-23	2.30132e-21
847	ENSG00000159184	HOXB13	10481	24.0675	-5.16904	0.591919	-7.92677	2.24927e-15	2.81107e-14
848	ENSG00000159200	RCAN1	1827	3380.52	2.38986	0.156192	15.3003	7.61007e-53	1.90018e-50
849	ENSG00000159217	IGF2BP1	10642	634.901	-6.66909	0.388537	-17.1346	8.19231e-66	3.90019e-63
850	ENSG00000159224	GIP	2695	2.26143	-3.41809	0.61941	-4.50081	6.76957e-06	2.44452e-05
851	ENSG00000159259	CHAF1B	8208	270.471	-2.54536	0.186435	-13.6501	2.0155e-42	2.71568e-40
852	ENSG00000159339	PADI4	23569	6.15909	2.19874	0.267349	8.22672	1.92414e-16	2.69954e-15
853	ENSG00000159387	IRX6	79190	4.67147	-5.14633	0.490284	-7.12659	1.02886e-12	9.38589e-12
854	ENSG00000159409	CELF3	11189	1.90428	-3.45015	0.363049	-6.91798	4.58144e-12	3.86542e-11
855	ENSG00000159556	ISL2	64843	18.451	-3.82289	0.389331	-9.69523	3.15938e-22	8.08086e-21
856	ENSG00000159650	UROC1	131669	3030.44	2.23241	0.332313	6.71358	1.89905e-11	1.47697e-10
857	ENSG00000159763	PIP	5304	1.473	-3.33746	0.537668	-3.75237	0.000175173	0.000500341
858	ENSG00000160050	CCDC28B	79140	251.539	-2.34102	0.202893	-11.5366	8.62398e-31	5.00696e-29
859	ENSG00000160207	HSF2BP	11077	16.5962	-2.09629	0.195203	-10.7129	8.85515e-27	3.51704e-25
860	ENSG00000160211	G6PD	2539	1868.01	-2.56994	0.211342	-12.161	5.01391e-34	3.72972e-32
861	ENSG00000160224	AIRE	326	4.22943	-2.90459	0.42424	-6.1107	9.91953e-10	6.21054e-09
862	ENSG00000160284	SPATC1L	84221	244.626	-2.87032	0.223472	-12.8412	9.63772e-38	9.4023e-36
863	ENSG00000160298	C21orf58	54058	167.65	-2.24845	0.153314	-14.6616	1.13525e-48	2.15613e-46
864	ENSG00000160321	ZNF208	7757	18.3299	-2.09346	0.304977	-6.33808	2.32651e-10	1.57808e-09
865	ENSG00000160323	ADAMTS13	11093	508.914	2.80762	0.144304	19.4559	2.59763e-84	5.45594e-81
866	ENSG00000160339	FCN2	2220	479.382	4.7206	0.355664	13.2502	4.49955e-40	5.21626e-38
867	ENSG00000160471	COX6B2	125965	4.02758	-2.30978	0.310851	-4.19651	2.71057e-05	8.86866e-05
868	ENSG00000160505	NLRP4	147945	2.73142	-3.65291	0.57321	-4.07655	4.57084e-05	0.000144074
869	ENSG00000160678	S100A1	6271	281.793	-2.59403	0.253642	-7.5896	3.20897e-14	3.49327e-13
870	ENSG00000160716	CHRNB2	1141	7.68278	-2.1947	0.288132	-6.64464	3.03969e-11	2.30534e-10
871	ENSG00000160801	PTH1R	5745	287.35	3.19765	0.224206	14.2598	3.89833e-46	6.47413e-44
872	ENSG00000160886	LY6K	54742	17.7037	-3.83935	0.358308	-6.01179	1.83491e-09	1.10541e-08
873	ENSG00000160957	RECQL4	9401	925.264	-2.66519	0.176636	-15.0883	1.93479e-51	4.42845e-49
874	ENSG00000160973	FOXH1	8928	4.71037	-4.15535	0.313728	-7.1978	6.11914e-13	5.7452e-12
875	ENSG00000161055	SCGB3A1	92304	24.5487	2.15688	0.234578	9.19482	3.75626e-20	7.8296e-19
876	ENSG00000161270	NPHS1	4868	6.57669	-4.14316	0.453247	-5.98789	2.12576e-09	1.26906e-08
877	ENSG00000161381	PLXDC1	57125	300.732	-2.96004	0.184177	-15.2166	2.7427e-52	6.7076e-50
878	ENSG00000161609	CCDC155	147872	14.2734	-2.78859	0.417712	-6.64967	2.93756e-11	2.23167e-10
879	ENSG00000161640	SIGLEC11	114132	48.0487	2.31435	0.20781	11.1366	8.32642e-29	4.01761e-27
880	ENSG00000161664	ASB16	92591	38.5084	-2.05621	0.174977	-11.7398	7.96407e-32	5.06889e-30
881	ENSG00000161682	FAM171A2	284069	59.8906	-2.07991	0.222385	-9.34752	8.97236e-21	2.00731e-19
882	ENSG00000161798	AQP5	362	7.38852	-2.59981	0.314035	-5.48328	4.17505e-08	2.08729e-07
883	ENSG00000161800	RACGAP1	29127	627.697	-2.39156	0.139687	-17.1195	1.06247e-65	4.99163e-63
884	ENSG00000161888	SPC24	147841	486.4	-3.44064	0.180049	-19.1042	2.33128e-81	2.97288e-78
885	ENSG00000162004	CCDC78	124093	37.1565	-2.28454	0.242206	-9.41995	4.51324e-21	1.03834e-19
886	ENSG00000162009	SSTR5	6755	40.4897	-5.09563	0.605783	-8.28072	1.22432e-16	1.75283e-15
887	ENSG00000162062	TEDC2	80178	208.645	-2.74611	0.18102	-15.1651	6.02188e-52	1.45282e-49
888	ENSG00000162063	CCNF	899	361.683	-2.16364	0.145673	-14.8511	6.83916e-50	1.3875e-47
889	ENSG00000162344	FGF19	9965	203.986	-3.20384	0.450737	-5.49013	4.01634e-08	2.01161e-07
890	ENSG00000162365	CYP4A22	284541	5551.61	2.14556	0.247401	8.67086	4.28884e-18	7.18281e-17
891	ENSG00000162366	PDZK1IP1	10158	2692.16	-2.8732	0.348965	-8.24198	1.69388e-16	2.38775e-15
892	ENSG00000162399	BSND	7809	5.68136	-3.52983	0.489284	-7.2181	5.27204e-13	4.9879e-12
893	ENSG00000162438	CTRC	11330	2.1561	-2.2354	0.343806	-4.43835	9.0653e-06	3.20799e-05
894	ENSG00000162494	LRRC38	126755	1.07146	-4.09349	0.613592	-2.49342	0.0126518	0.0247735
895	ENSG00000162595	DIRAS3	9077	101.176	2.80298	0.277475	10.0983	5.62077e-24	1.66001e-22
896	ENSG00000162670	BRINP3	339479	13.0384	-5.26413	0.586394	-8.23267	1.83089e-16	2.57478e-15
897	ENSG00000162728	KCNJ9	3765	2.51236	-2.91226	0.441827	-5.49847	3.83105e-08	1.92501e-07
898	ENSG00000162745	OLFML2B	25903	381.589	-3.14455	0.180556	-16.3374	5.34455e-60	1.81745e-57
899	ENSG00000162763	LRRC52	440699	6.08319	-2.70906	0.527128	-4.61626	3.90726e-06	1.4667e-05
900	ENSG00000162769	FLVCR1	28982	639.501	-2.18228	0.134755	-16.1934	5.60943e-59	1.77248e-56
901	ENSG00000162779	AXDND1	126859	8.10852	-2.05025	0.284358	-6.54875	5.80213e-11	4.24096e-10
902	ENSG00000162782	TDRD5	163589	10.0778	-3.6413	0.505483	-6.00929	1.86335e-09	1.12178e-08
903	ENSG00000162873	KLHDC8A	55220	21.1802	-2.24394	0.336041	-6.19597	5.7929e-10	3.73764e-09
904	ENSG00000162931	TRIM17	51127	26.4899	-3.3252	0.342255	-9.18915	3.95968e-20	8.22003e-19
905	ENSG00000162949	CAPN13	92291	49.5324	-2.52915	0.448838	-4.84945	1.23803e-06	4.99889e-06
906	ENSG00000162975	KCNF1	3754	66.9369	-2.26085	0.373985	-8.3688	5.82066e-17	8.67053e-16
907	ENSG00000163064	EN1	2019	3.7665	-4.22631	0.588801	-5.58229	2.37373e-08	1.22622e-07
908	ENSG00000163092	XIRP2	129446	1.33462	-2.07645	0.624492	-2.70911	0.00674637	0.0140524
909	ENSG00000163132	MSX1	4487	91.2022	-2.00023	0.185278	-9.9132	3.64779e-23	1.01677e-21
910	ENSG00000163217	BMP10	27302	11.1399	4.47986	0.585997	7.54626	4.47919e-14	4.7985e-13
911	ENSG00000163221	S100A12	6283	11.8235	2.93016	0.257749	11.3684	6.00481e-30	3.22903e-28
912	ENSG00000163286	ALPG	251	1.3083	-2.0683	0.625678	-2.83542	0.00457661	0.00989779
913	ENSG00000163288	GABRB1	2560	2.16922	-2.07768	0.520718	-2.99258	0.00276627	0.00627046
914	ENSG00000163295	ALPI	248	76.6657	-7.50997	0.530506	-10.408	2.27998e-25	7.82025e-24
915	ENSG00000163331	DAPL1	92196	6.82824	-4.79377	0.546351	-3.77902	0.000157446	0.000453807
916	ENSG00000163352	LENEP	55891	1.08302	-2.1731	0.35196	-6.17424	6.64844e-10	4.25658e-09
917	ENSG00000163354	DCST2	127579	72.1067	-2.03692	0.181731	-10.1704	2.68918e-24	8.19281e-23
918	ENSG00000163357	DCST1	149095	19.7687	-2.17134	0.219683	-9.86197	6.08418e-23	1.66469e-21
919	ENSG00000163362	INAVA	55765	298.014	-2.33793	0.312098	-7.4935	6.70624e-14	7.02003e-13
920	ENSG00000163377	TAFA4	151647	21.6764	-4.39009	0.573229	-5.69074	1.26487e-08	6.79663e-08
921	ENSG00000163395	IGFN1	91156	26.6861	-4.60533	0.410571	-2.94588	0.00322037	0.00720693
922	ENSG00000163421	PROK2	60675	3.76183	2.842	0.29434	9.65798	4.54738e-22	1.14264e-20
923	ENSG00000163464	CXCR1	3577	21.5604	2.21295	0.260082	8.50802	1.76931e-17	2.78304e-16
924	ENSG00000163499	CRYBA2	1412	3.18421	-4.84011	0.507384	-5.3383	9.38209e-08	4.47664e-07
925	ENSG00000163507	CIP2A	57650	140.405	-2.14286	0.181578	-11.7979	4.00104e-32	2.58338e-30
926	ENSG00000163515	RETNLB	84666	1.80685	-2.84009	0.56127	-4.60337	4.1571e-06	1.55477e-05
927	ENSG00000163535	SGO2	151246	181.717	-2.35791	0.161075	-14.6345	1.69316e-48	3.19873e-46
928	ENSG00000163554	SPTA1	6708	21.4376	-3.30914	0.389483	-5.27766	1.30845e-07	6.11354e-07
929	ENSG00000163618	CADPS	8618	25.0023	-2.34483	0.397369	-2.79981	0.00511327	0.010947
930	ENSG00000163687	DNASE1L3	1776	1364	2.85917	0.232167	12.3129	7.7206e-35	6.08547e-33
931	ENSG00000163735	CXCL5	6374	157.462	-2.72225	0.440074	-4.46689	7.93633e-06	2.83488e-05
932	ENSG00000163793	DNAJC5G	285126	2.65506	-2.32175	0.390011	-4.91339	8.95167e-07	3.68958e-06
933	ENSG00000163808	KIF15	56992	152.737	-3.30173	0.209564	-15.7413	7.88512e-56	2.14921e-53
934	ENSG00000163810	TGM4	7047	3.16362	-3.1974	0.349335	-5.44034	5.31779e-08	2.62297e-07
935	ENSG00000163888	CAMK2N2	94032	103.046	-2.31439	0.259815	-8.90591	5.29497e-19	9.84699e-18
936	ENSG00000163914	RHO	6010	5.34503	-3.46916	0.402181	-8.55746	1.15378e-17	1.84905e-16
937	ENSG00000163915	IGF2BP2-AS1	646600	9.33064	-3.29613	0.423501	-7.69176	1.4513e-14	1.65084e-13
938	ENSG00000163993	S100P	6286	2481.84	-5.62274	0.402835	-13.4541	2.91237e-41	3.66159e-39
939	ENSG00000164007	CLDN19	149461	45.597	-2.76818	0.376088	-6.90552	5.00216e-12	4.20252e-11
940	ENSG00000164045	CDC25A	993	179.296	-2.11094	0.190794	-11.062	1.91767e-28	8.90405e-27
941	ENSG00000164076	CAMKV	79012	2.76528	-4.33431	0.51953	-5.42013	5.95543e-08	2.92255e-07
942	ENSG00000164093	PITX2	5308	10.4627	-4.44797	0.552399	-6.11909	9.4114e-10	5.91105e-09
943	ENSG00000164100	NDST3	9348	13.3006	4.20856	0.336595	12.4909	8.36558e-36	7.09504e-34
944	ENSG00000164109	MAD2L1	4085	342.064	-2.12973	0.155596	-13.6862	1.22832e-42	1.67398e-40
945	ENSG00000164112	TMEM155	132332	4.67613	-3.03316	0.387101	-5.34801	8.8926e-08	4.25743e-07
946	ENSG00000164128	NPY1R	4886	180.14	2.33485	0.252163	9.2575	2.09273e-20	4.47443e-19
947	ENSG00000164161	HHIP	64399	201.791	3.16643	0.394887	8.00423	1.20216e-15	1.54551e-14
948	ENSG00000164176	EDIL3	10085	257.49	-2.73592	0.214506	-11.9079	1.07637e-32	7.26519e-31
949	ENSG00000164188	RANBP3L	202151	108.549	2.29161	0.289697	7.90772	2.62155e-15	3.25131e-14
950	ENSG00000164256	PRDM9	56979	4.61901	-3.69817	0.449163	-7.73182	1.06017e-14	1.22506e-13
951	ENSG00000164266	SPINK1	6690	15479.3	-2.75904	0.385213	-7.1737	7.29991e-13	6.77895e-12
952	ENSG00000164283	ESM1	11082	453.141	-4.09158	0.228728	-17.8801	1.68457e-71	1.11387e-68
953	ENSG00000164287	CDC20B	166979	16.0099	-4.03591	0.432651	-8.19482	2.50968e-16	3.47867e-15
954	ENSG00000164303	ENPP6	133121	37.7414	-2.77664	0.35761	-6.18285	6.29533e-10	4.03919e-09
955	ENSG00000164304	CAGE1	285782	4.11732	-2.69821	0.38386	-5.06624	4.05749e-07	1.76584e-06
956	ENSG00000164330	EBF1	1879	150.456	-2.14055	0.16649	-11.8899	1.33633e-32	8.91869e-31
957	ENSG00000164362	TERT	7015	226.403	-8.22976	0.442091	-17.5643	4.62378e-69	2.62058e-66
958	ENSG00000164363	SLC6A18	348932	1.14444	-2.09651	0.687387	-2.77353	0.00554509	0.0117755
959	ENSG00000164418	GRIK2	2898	15.7756	-2.53379	0.367492	-4.62038	3.83029e-06	1.43841e-05
960	ENSG00000164434	FABP7	2173	1.64682	-5.09574	0.438778	-2.68829	0.00718189	0.0148624
961	ENSG00000164509	IL31RA	133396	4.94521	-2.32609	0.382378	-4.50336	6.68885e-06	2.41831e-05
962	ENSG00000164512	ANKRD55	79722	37.1644	2.20782	0.227944	9.6854	3.4785e-22	8.87167e-21
963	ENSG00000164532	TBX20	57057	2.3635	2.68731	0.346975	7.74736	9.38242e-15	1.09266e-13
964	ENSG00000164611	PTTG1	9232	721.062	-3.68357	0.196883	-18.7059	4.43044e-78	4.16298e-75
965	ENSG00000164619	BMPER	168667	97.9347	4.39358	0.294439	14.9113	2.78122e-50	5.91109e-48
966	ENSG00000164651	SP8	221833	19.1322	-5.34681	0.613132	-8.55753	1.15307e-17	1.84875e-16
967	ENSG00000164744	SUN3	256979	2.85268	-2.45526	0.428639	-3.87436	0.000106907	0.000317546
968	ENSG00000164756	SLC30A8	169026	3.30478	-3.92131	0.534093	-4.63487	3.57166e-06	1.34866e-05
969	ENSG00000164764	SBSPON	157869	91.9612	-2.31413	0.241651	-6.82625	8.71641e-12	7.1008e-11
970	ENSG00000164778	EN2	2020	12.9023	-3.59832	0.502059	-7.0885	1.35572e-12	1.21902e-11
971	ENSG00000164796	CSMD3	114788	5.82765	-2.349	0.531782	-3.55322	0.000380539	0.00101879
972	ENSG00000164920	OSR2	116039	68.0458	-4.01578	0.34605	-11.567	6.05916e-31	3.576e-29
973	ENSG00000164932	CTHRC1	115908	331.92	-3.91552	0.278337	-14.0629	6.42059e-45	9.96754e-43
974	ENSG00000165078	CPA6	57094	19.4982	-5.54943	0.461478	-10.1506	3.2935e-24	9.93223e-23
975	ENSG00000165140	FBP1	2203	16428.9	2.00542	0.224106	8.94753	3.63512e-19	6.90769e-18
976	ENSG00000165188	RNF183	138065	11.5839	-3.01273	0.371235	-7.28063	3.32266e-13	3.21602e-12
977	ENSG00000165192	ASB11	140456	4.10144	-2.02592	0.40514	-3.22043	0.00127999	0.00309979
978	ENSG00000165197	VEGFD	2277	142.756	-2.57904	0.296086	-7.07107	1.53738e-12	1.37372e-11
979	ENSG00000165304	MELK	9833	287.646	-3.73966	0.193884	-19.2742	8.84589e-83	1.43569e-79
980	ENSG00000165480	SKA3	221150	178.17	-3.49725	0.19515	-17.9041	1.09556e-71	7.52272e-69
981	ENSG00000165496	RPL10L	140801	6.75569	-4.70185	0.521432	-7.21564	5.36799e-13	5.06794e-12
982	ENSG00000165509	MAGEC3	139081	2.82505	-3.44927	0.623916	-3.58372	0.000338731	0.000916405
983	ENSG00000165583	SSX5	6758	6.26811	-4.50337	0.676557	-5.91161	3.38777e-09	1.96721e-08
984	ENSG00000165584	SSX3	10214	4.72457	-5.11713	0.725518	-4.63128	3.63412e-06	1.37051e-05
985	ENSG00000165606	DRGX	644168	7.97776	-4.87559	0.52602	-7.56037	4.01928e-14	4.32918e-13
986	ENSG00000165643	SOHLH1	402381	2.49176	-5.08953	0.55126	-4.77843	1.76669e-06	6.97959e-06
987	ENSG00000165682	CLEC1B	51266	152.049	4.93415	0.429378	11.4477	2.41478e-30	1.35144e-28
988	ENSG00000165685	TMEM52B	120939	12.3437	-3.06045	0.37489	-5.31764	1.05121e-07	4.97541e-07
989	ENSG00000165731	RET	5979	119.627	2.15807	0.334425	6.44922	1.12427e-10	7.92248e-10
990	ENSG00000165841	CYP2C19	1557	125.026	3.60958	0.329778	10.9352	7.82219e-28	3.3978e-26
991	ENSG00000165891	E2F7	144455	80.6895	-3.42079	0.232812	-14.6641	1.09417e-48	2.08921e-46
992	ENSG00000165966	PDZRN4	29951	14.6023	2.19549	0.342449	6.408	1.47437e-10	1.02301e-09
993	ENSG00000165973	NELL1	4745	2.27656	-5.43629	0.662765	-3.39223	0.00069327	0.00176725
994	ENSG00000166006	KCNC2	3747	29.363	-2.57363	0.517147	-4.29844	1.72001e-05	5.81303e-05
995	ENSG00000166105	GLB1L3	112937	17.6453	-3.15475	0.44146	-7.10915	1.16763e-12	1.05789e-11
996	ENSG00000166143	PPP1R14D	54866	25.1552	-4.06042	0.382692	-8.73596	2.41586e-18	4.16063e-17
997	ENSG00000166148	AVPR1A	552	1611.34	2.405	0.355225	6.76432	1.33934e-11	1.06383e-10
998	ENSG00000166165	CKB	1152	2646.29	-2.02458	0.275592	-7.3482	2.00893e-13	1.9953e-12
999	ENSG00000166183	ASPG	374569	1936.4	2.00597	0.329135	6.09136	1.11953e-09	6.95923e-09
1000	ENSG00000166342	NETO1	81832	2.36282	-2.12647	0.458347	-4.60756	4.07425e-06	1.52522e-05
1001	ENSG00000166391	MOGAT2	80168	1934.11	2.17946	0.305334	7.13489	9.68618e-13	8.86579e-12
1002	ENSG00000166407	LMO1	4004	2.71677	-2.94945	0.601854	-4.90024	9.57214e-07	3.92242e-06
1003	ENSG00000166426	CRABP1	1381	1.60102	-3.07519	0.620775	-3.79209	0.000149384	0.00043214
1004	ENSG00000166473	PKD1L2	114780	89.4233	-2.54896	0.300595	-7.41041	1.25906e-13	1.28007e-12
1005	ENSG00000166558	SLC38A8	146167	8.97008	-4.67513	0.545787	-6.8593	6.9201e-12	5.70138e-11
1006	ENSG00000166578	IQCD	115811	61.5962	-2.66434	0.231794	-11.4816	1.63226e-30	9.22177e-29
1007	ENSG00000166589	CDH16	1014	117.893	-2.36673	0.3844	-5.84637	5.02408e-09	2.84927e-08
1008	ENSG00000166670	MMP10	4319	25.0272	-3.43205	0.379773	-6.29468	3.08034e-10	2.05582e-09
1009	ENSG00000166736	HTR3A	3359	10.0736	-4.89133	0.457596	-6.52851	6.64258e-11	4.82269e-10
1010	ENSG00000166741	NNMT	4837	32356.2	2.1733	0.29733	7.30657	2.74057e-13	2.67948e-12
1011	ENSG00000166763	STRCP1	554225	11.0284	-2.20528	0.277139	-6.63785	3.18298e-11	2.40481e-10
1012	ENSG00000166803	PCLAF	9768	387.672	-2.44089	0.171139	-14.261	3.82799e-46	6.38702e-44
1013	ENSG00000166828	SCNN1G	6340	1.5776	-4.55083	0.442745	-2.42011	0.0155158	0.029796
1014	ENSG00000166840	GLYATL1	92292	5328.69	2.03784	0.236767	8.6057	7.585e-18	1.23441e-16
1015	ENSG00000166851	PLK1	5347	478.268	-3.49831	0.19588	-17.8544	2.67035e-71	1.73359e-68
1016	ENSG00000166856	GPR182	11318	70.604	3.30631	0.281032	11.76	6.27378e-32	4.00736e-30
1017	ENSG00000166863	TAC3	6866	6.54726	-2.72653	0.36975	-5.57363	2.49479e-08	1.28485e-07
1018	ENSG00000166866	MYO1A	4640	143.079	-2.95574	0.272644	-10.8369	2.30122e-27	9.6102e-26
1019	ENSG00000166869	CHP2	63928	21.6973	-5.1803	0.660315	-8.4453	3.03263e-17	4.63739e-16
1020	ENSG00000166897	ELFN2	114794	300.714	-3.58943	0.318807	-11.2614	2.03405e-29	1.04802e-27
1021	ENSG00000166920	C15orf48	84419	305.742	-2.23462	0.29737	-7.51636	5.63218e-14	5.95154e-13
1022	ENSG00000167011	NAT16	375607	6.44656	-3.0183	0.314072	-5.3222	1.02521e-07	4.8601e-07
1023	ENSG00000167080	B4GALNT2	124872	167.141	-6.58785	0.529104	-12.0634	1.64894e-33	1.18253e-31
1024	ENSG00000167104	BPIFB6	128859	2.51729	-3.34691	0.71416	-3.85835	0.000114155	0.00033686
1025	ENSG00000167157	PRRX2	51450	10.7429	-2.8322	0.379382	-6.72645	1.73851e-11	1.35981e-10
1026	ENSG00000167210	LOXHD1	125336	7.36769	-2.67296	0.311067	-8.50635	1.79496e-17	2.81966e-16
1027	ENSG00000167332	OR51E2	81285	5.20724	-2.99826	0.374853	-7.60944	2.7528e-14	3.02622e-13
1028	ENSG00000167355	OR51B5	282763	4.96652	-2.19463	0.469253	-4.07529	4.59561e-05	0.0001448
1029	ENSG00000167434	CA4	762	62.0305	-3.10861	0.349452	-8.88822	6.20949e-19	1.14405e-17
1030	ENSG00000167513	CDT1	81620	537.144	-3.37322	0.195916	-17.2145	2.06849e-66	1.06732e-63
1031	ENSG00000167612	ANKRD33	341405	21.1468	-4.88809	0.509286	-7.6914	1.45531e-14	1.65488e-13
1032	ENSG00000167619	TMEM145	284339	46.6653	-3.86138	0.307087	-12.5135	6.29835e-36	5.44525e-34
1033	ENSG00000167644	C19orf33	64073	53.9087	-2.13057	0.314616	-4.60838	4.0582e-06	1.51953e-05
1034	ENSG00000167653	PSCA	8000	11.7151	-3.8672	0.359226	-8.07386	6.81126e-16	8.98422e-15
1035	ENSG00000167654	ATCAY	85300	1.15241	-2.28771	0.380218	-2.35548	0.0184987	0.0349147
1036	ENSG00000167748	KLK1	3816	3.63323	-2.10592	0.390366	-3.65362	0.000258567	0.000714359
1037	ENSG00000167749	KLK4	9622	24.7525	-5.99226	0.608918	-7.68843	1.4895e-14	1.69053e-13
1038	ENSG00000167751	KLK2	3817	15.361	-4.77224	0.617857	-7.91349	2.50275e-15	3.11045e-14
1039	ENSG00000167755	KLK6	5653	3.78009	-2.10496	0.547579	-2.44089	0.014651	0.0282802
1040	ENSG00000167759	KLK13	26085	3.46243	-2.65525	0.540764	-3.59878	0.000319718	0.000869647
1041	ENSG00000167771	RCOR2	283248	34.5579	-2.29985	0.304077	-7.13777	9.48551e-13	8.69183e-12
1042	ENSG00000167880	EVPL	2125	172.998	-2.56258	0.377551	-6.79352	1.0943e-11	8.79626e-11
1043	ENSG00000167900	TK1	7083	1504.13	-2.29528	0.166178	-13.8122	2.15042e-43	3.05908e-41
1044	ENSG00000167968	DNASE1L2	1775	37.9797	-2.61836	0.254505	-9.73625	2.11205e-22	5.4647e-21
1045	ENSG00000167971	CASKIN1	57524	12.5039	-3.42575	0.376344	-8.99411	2.38149e-19	4.60636e-18
1046	ENSG00000168032	ENTPD3	956	12.3339	-2.67955	0.376284	-5.83844	5.26911e-09	2.98018e-08
1047	ENSG00000168060	NAALADL1	10004	224.363	-2.16982	0.256416	-7.26455	3.74268e-13	3.59044e-12
1048	ENSG00000168065	SLC22A11	55867	818.323	-4.01024	0.386154	-10.4057	2.33487e-25	7.98552e-24
1049	ENSG00000168078	PBK	55872	247.971	-3.3457	0.203175	-16.4588	7.25236e-61	2.51411e-58
1050	ENSG00000168124	OR1F1	4992	3.09917	-3.18602	0.520214	-6.12419	9.11464e-10	5.73475e-09
1051	ENSG00000168243	GNG4	2786	485.628	-5.14204	0.413241	-13.6141	3.29976e-42	4.41278e-40
1052	ENSG00000168267	PTF1A	256297	2.79627	-3.94108	0.677709	-4.06523	4.79851e-05	0.000150771
1053	ENSG00000168268	NT5DC2	64943	1110.31	-2.60494	0.203863	-12.7783	2.16686e-37	2.07983e-35
1054	ENSG00000168389	MFSD2A	84879	3167.51	2.20245	0.329263	6.68504	2.30864e-11	1.77426e-10
1055	ENSG00000168427	KLHL30	377007	23.9003	-2.46141	0.270948	-6.54821	5.82289e-11	4.25527e-10
1056	ENSG00000168481	LGI3	203190	38.7833	-3.12352	0.392892	-7.93815	2.05227e-15	2.5766e-14
1057	ENSG00000168505	GBX2	2637	2.0136	-2.75323	0.42736	-6.44254	1.17489e-10	8.25961e-10
1058	ENSG00000168748	CA7	766	0.926099	-2.05694	0.462606	-2.57284	0.0100868	0.0202235
1059	ENSG00000168754	FAM178B	51252	45.1019	-4.34178	0.476351	-8.70269	3.24101e-18	5.51852e-17
1060	ENSG00000168757	TSPY2	64591	2.76668	-3.01249	0.892589	-2.64664	0.00812958	0.0166375
1061	ENSG00000168779	SHOX2	6474	15.1654	-3.00117	0.319332	-8.46501	2.56127e-17	3.94023e-16
1062	ENSG00000168785	TSPAN5	10098	370.463	-2.09372	0.270243	-7.35708	1.87976e-13	1.87273e-12
1063	ENSG00000168843	FSTL5	56884	63.9693	-3.26697	0.523427	-6.27366	3.52661e-10	2.33899e-09
1064	ENSG00000168903	BTNL3	10917	22.2244	-3.03612	0.547982	-3.82551	0.0001305	0.000381281
1065	ENSG00000168907	PLA2G4F	255189	8.94338	-2.98083	0.44472	-5.04109	4.62879e-07	1.99464e-06
1066	ENSG00000168925	CTRB1	1504	0.891128	-5.18616	0.59991	-2.52972	0.0114154	0.0225953
1067	ENSG00000168928	CTRB2	440387	1.17916	-5.35481	0.499064	-2.41087	0.0159146	0.0304771
1068	ENSG00000168955	TM4SF20	79853	304.916	-7.18141	0.527967	-12.5524	3.85813e-36	3.36818e-34
1069	ENSG00000168959	GRM5	2915	1.6077	-2.54423	0.577759	-3.35701	0.000787896	0.00198944
1070	ENSG00000168995	SIGLEC7	27036	71.1755	2.02276	0.179211	11.287	1.52193e-29	7.89855e-28
1071	ENSG00000169059	VCX3A	51481	6.26272	-5.16334	0.596951	-6.7477	1.50209e-11	1.18553e-10
1072	ENSG00000169064	ZBBX	79740	0.990036	-2.14154	0.544831	-3.08372	0.00204427	0.00475554
1073	ENSG00000169213	RAB3B	5865	586.991	-3.68795	0.280219	-13.1625	1.44189e-39	1.59889e-37
1074	ENSG00000169258	GPRIN1	114787	171.023	-2.56446	0.193742	-13.2317	5.75407e-40	6.56405e-38
1075	ENSG00000169271	HSPB3	8988	1.44512	-3.4109	0.660645	-3.1456	0.00165747	0.00392528
1076	ENSG00000169297	NR0B1	190	19.2937	-5.65631	0.630439	-8.32223	8.63271e-17	1.26069e-15
1077	ENSG00000169313	P2RY12	64805	16.6363	2.37863	0.246061	9.66656	4.18214e-22	1.05747e-20
1078	ENSG00000169347	GP2	2813	170.373	-5.03369	0.551994	-6.92032	4.50611e-12	3.80817e-11
1079	ENSG00000169427	KCNK9	51305	50.474	-5.91769	0.487323	-11.9509	6.42626e-33	4.41262e-31
1080	ENSG00000169436	COL22A1	169044	144.38	-4.42095	0.393326	-10.5004	8.59975e-26	3.06756e-24
1081	ENSG00000169548	ZNF280A	129025	1.83557	-2.42235	0.626095	-3.86853	0.000109493	0.00032423
1082	ENSG00000169550	MUC15	143662	46.1863	-4.30217	0.581222	-7.27175	3.54864e-13	3.4153e-12
1083	ENSG00000169551	CT55	54967	3.66142	-3.83237	0.727027	-4.42926	9.45577e-06	3.33361e-05
1084	ENSG00000169607	CKAP2L	150468	201.204	-3.1527	0.193566	-16.2781	1.41267e-59	4.62761e-57
1085	ENSG00000169618	PROKR1	10887	5.57207	-2.3772	0.40182	-4.88034	1.05902e-06	4.31561e-06
1086	ENSG00000169679	BUB1	699	332.209	-3.45848	0.187046	-18.4815	2.91136e-76	2.36256e-73
1087	ENSG00000169715	MT1E	4493	10007.1	2.50008	0.33499	7.45774	8.80175e-14	9.0889e-13
1088	ENSG00000169758	TMEM266	123591	63.6965	-2.02694	0.216493	-9.35782	8.14011e-21	1.8326e-19
1089	ENSG00000169760	NLGN1	22871	6.66834	-2.87634	0.380026	-4.23454	2.29025e-05	7.59362e-05
1090	ENSG00000169783	LINGO1	84894	332.898	-2.49855	0.25566	-9.77341	1.46437e-22	3.88171e-21
1091	ENSG00000169855	ROBO1	6091	2892.6	-2.84185	0.213276	-13.3261	1.63308e-40	1.96333e-38
1092	ENSG00000169862	CTNND2	1501	414.075	-2.26934	0.43196	-5.26417	1.40826e-07	6.54729e-07
1093	ENSG00000169900	PYDC1	260434	2.65808	-3.2559	0.58842	-3.77729	0.000158544	0.000456752
1094	ENSG00000170044	ZPLD1	131368	35.3771	-2.29502	0.457029	-2.45944	0.0139152	0.0269957
1095	ENSG00000170166	HOXD4	3233	6.98868	-4.40355	0.426495	-10.3248	5.44378e-25	1.77257e-23
1096	ENSG00000170231	FABP6	2172	9.19233	-4.19915	0.480601	-6.6779	2.42386e-11	1.85881e-10
1097	ENSG00000170289	CNGB3	54714	5.06337	-2.29339	0.400222	-5.67487	1.38792e-08	7.43208e-08
1098	ENSG00000170290	SLN	6588	2.78815	-3.11459	0.590001	-4.82588	1.3939e-06	5.58842e-06
1099	ENSG00000170312	CDK1	983	625.47	-3.44083	0.185741	-18.5212	1.39306e-76	1.15675e-73
1100	ENSG00000170323	FABP4	2167	446.94	-2.69461	0.282206	-8.16995	3.08527e-16	4.23214e-15
1101	ENSG00000170324	FRMPD2	143162	2.94204	-2.14138	0.464205	-4.23767	2.25855e-05	7.49548e-05
1102	ENSG00000170345	FOS	2353	6037.18	3.04709	0.238382	12.7796	2.13061e-37	2.05056e-35
1103	ENSG00000170367	CST5	1473	5.70206	-2.16986	0.510954	-3.07665	0.00209339	0.00486093
1104	ENSG00000170369	CST2	1470	17.5573	-2.94025	0.387978	-7.54144	4.64813e-14	4.97054e-13
1105	ENSG00000170373	CST1	1469	117.056	-6.72357	0.541245	-11.1134	1.08005e-28	5.14877e-27
1106	ENSG00000170442	KRT86	3892	56.825	-2.20178	0.313897	-7.01155	2.35694e-12	2.05361e-11
1107	ENSG00000170509	HSD17B13	345275	9154.93	2.17172	0.369116	5.87799	4.15282e-09	2.37858e-08
1108	ENSG00000170516	COX7B2	170712	232.89	-7.68433	0.602748	-13.0297	8.29631e-39	8.79015e-37
1109	ENSG00000170537	TMC7	79905	99.7102	-2.14044	0.181123	-11.8129	3.3472e-32	2.173e-30
1110	ENSG00000170577	SIX2	10736	42.7779	-6.00464	0.437073	-13.0899	3.76276e-39	4.09613e-37
1111	ENSG00000170627	GTSF1	121355	250.627	-3.99718	0.425813	-9.41056	4.93491e-21	1.1317e-19
1112	ENSG00000170684	ZNF296	162979	59.2847	-2.15771	0.21983	-9.80874	1.03253e-22	2.77199e-21
1113	ENSG00000170689	HOXB9	3219	9.10112	-3.22969	0.45451	-8.93861	3.94083e-19	7.44898e-18
1114	ENSG00000170743	SYT9	143425	99.3664	2.17476	0.48332	4.48632	7.24655e-06	2.60464e-05
1115	ENSG00000170788	DYDC1	143241	3.01705	-2.53927	0.432128	-5.83806	5.28119e-09	2.98607e-08
1116	ENSG00000170819	BFSP2	8419	11.1451	-2.9074	0.346407	-8.32259	8.60607e-17	1.25835e-15
1117	ENSG00000170835	CEL	1056	43.6395	-3.18174	0.282969	-9.97257	2.00968e-23	5.70411e-22
1118	ENSG00000170890	PLA2G1B	5319	60.5852	-2.2182	0.264338	-7.3528	1.94094e-13	1.93006e-12
1119	ENSG00000171004	HS6ST2	90161	86.7513	-3.64325	0.444509	-7.30983	2.67484e-13	2.61952e-12
1120	ENSG00000171049	FPR2	2358	17.1656	2.72119	0.275748	9.86659	5.81082e-23	1.59356e-21
1121	ENSG00000171126	KCNG3	170850	1.68816	-2.47536	0.546916	-4.5255	6.02535e-06	2.19308e-05
1122	ENSG00000171136	RLN3	117579	1.68651	-2.86888	0.617939	-3.93306	8.38716e-05	0.000253275
1123	ENSG00000171199	OPRPN	58503	65.4409	-3.86488	0.412623	-5.17067	2.33255e-07	1.04907e-06
1124	ENSG00000171208	NETO2	81831	133.823	-2.24899	0.202574	-11.0986	1.27481e-28	6.02893e-27
1125	ENSG00000171241	SHCBP1	79801	165.781	-3.27092	0.207997	-15.7133	1.22531e-55	3.31447e-53
1126	ENSG00000171243	SOSTDC1	25928	26.5188	-2.93167	0.357122	-7.6968	1.39516e-14	1.59054e-13
1127	ENSG00000171246	NPTX1	4884	9.30621	-3.68425	0.400307	-6.45282	1.09788e-10	7.74262e-10
1128	ENSG00000171388	APLN	8862	354.761	-3.82505	0.216844	-17.6313	1.4177e-69	8.1646e-67
1129	ENSG00000171405	XAGE5	170627	28.8769	-5.52787	0.714866	-8.77255	1.74671e-18	3.06026e-17
1130	ENSG00000171431	KRT20	54474	41.1165	-5.9566	0.522446	-10.387	2.84171e-25	9.59943e-24
1131	ENSG00000171450	CDK5R2	8941	1.28151	-2.95024	0.571886	-3.55312	0.000380684	0.0010191
1132	ENSG00000171495	MROH2B	133558	36.1045	-2.43307	0.393586	-2.34988	0.0187793	0.0353825
1133	ENSG00000171502	COL24A1	255631	45.3608	-3.83839	0.357763	-10.6804	1.25681e-26	4.89375e-25
1134	ENSG00000171517	LPAR3	23566	17.6932	-2.1462	0.471333	-4.53584	5.73755e-06	2.09431e-05
1135	ENSG00000171551	ECEL1	9427	109.049	-6.02112	0.450452	-9.03547	1.63301e-19	3.19497e-18
1136	ENSG00000171587	DSCAM	1826	5.17501	2.03679	0.302361	6.73764	1.6098e-11	1.26523e-10
1137	ENSG00000171658	NMRAL2P	344887	240.638	-5.80003	0.338625	-17.0428	3.95324e-65	1.76443e-62
1138	ENSG00000171695	LKAAEAR1	198437	2.84026	-3.54877	0.496979	-6.32889	2.46937e-10	1.66802e-09
1139	ENSG00000171804	WDR87	83889	1.53137	-2.2157	0.49796	-3.53779	0.000403496	0.00107509
1140	ENSG00000171848	RRM2	6241	1204.42	-3.03955	0.177748	-17.0998	1.4891e-65	6.90518e-63
1141	ENSG00000171864	PRND	23627	36.2129	-3.85274	0.345181	-11.0905	1.39557e-28	6.55662e-27
1142	ENSG00000171873	ADRA1D	146	33.8991	-2.34049	0.37003	-5.762	8.31227e-09	4.5742e-08
1143	ENSG00000171931	FBXW10	10517	60.4994	-4.00618	0.380037	-10.5079	7.9482e-26	2.84367e-24
1144	ENSG00000171951	SCG2	7857	15.0784	-3.59744	0.368379	-9.24073	2.44811e-20	5.20001e-19
1145	ENSG00000172000	ZNF556	80032	8.06431	-2.48547	0.349916	-5.67561	1.38197e-08	7.4013e-08
1146	ENSG00000172016	REG3A	5068	6588.92	-8.55579	0.608728	-14.555	5.43077e-48	1.00472e-45
1147	ENSG00000172020	GAP43	2596	9.75796	-2.83873	0.36565	-7.21989	5.20296e-13	4.92646e-12
1148	ENSG00000172023	REG1B	5968	46.9206	-6.40152	0.743684	-8.26888	1.35228e-16	1.92676e-15
1149	ENSG00000172031	EPHX4	253152	13.1774	-2.60079	0.270747	-9.55629	1.22053e-21	2.97273e-20
1150	ENSG00000172073	TEX37	200523	5.22353	-3.61673	0.7843	-4.51399	6.36201e-06	2.30762e-05
1151	ENSG00000172244	C5orf34	375444	67.2162	-2.37678	0.149943	-15.8374	1.71671e-56	4.78881e-54
1152	ENSG00000172318	B3GALT1	8708	16.7539	-4.14189	0.472708	-7.34615	2.03992e-13	2.02214e-12
1153	ENSG00000172425	TTC36	143941	1159.98	2.69078	0.335976	8.00258	1.21843e-15	1.56493e-14
1154	ENSG00000172458	IL17D	53342	107.879	-3.08735	0.29938	-10.3067	6.57215e-25	2.12945e-23
1155	ENSG00000172551	MUCL1	118430	6.22314	-5.51389	0.519974	-3.48265	0.000496475	0.00130012
1156	ENSG00000172689	MS4A10	341116	7.96724	-4.38611	0.57114	-4.84068	1.29394e-06	5.20813e-06
1157	ENSG00000172789	HOXC5	3222	0.673419	-2.30132	0.600092	-2.25447	0.0241669	0.0442855
1158	ENSG00000172901	LVRN	206338	8.57359	-2.36919	0.335282	-7.02281	2.17454e-12	1.90025e-11
1159	ENSG00000172967	XKR3	150165	2.56553	-2.72638	0.558356	-4.88296	1.04507e-06	4.26315e-06
1160	ENSG00000172986	GXYLT2	727936	58.8902	-2.40969	0.311117	-7.74105	9.85968e-15	1.14599e-13
1161	ENSG00000172987	HPSE2	60495	3.1603	-2.82489	0.377648	-5.22508	1.7408e-07	7.98828e-07
1162	ENSG00000173080	RXFP4	339403	2.40431	-2.98461	0.491098	-5.61923	1.91813e-08	1.00571e-07
1163	ENSG00000173114	LRRN3	54674	20.4367	2.54647	0.250751	10.1545	3.16273e-24	9.55402e-23
1164	ENSG00000173157	ADAMTS20	80070	3.54525	-3.14983	0.558529	-5.35448	8.58038e-08	4.12011e-07
1165	ENSG00000173253	DMRT2	10655	2.48876	-2.68428	0.588749	-2.97749	0.00290616	0.0065576
1166	ENSG00000173267	SNCG	6623	857.793	-3.44724	0.287904	-10.5804	3.67327e-26	1.35973e-24
1167	ENSG00000173404	INSM1	3642	2.52251	-2.99638	0.553131	-3.02081	0.00252098	0.00576386
1168	ENSG00000173546	CSPG4	1464	499	-2.09042	0.157135	-13.3026	2.23549e-40	2.65185e-38
1169	ENSG00000173612	GPRC6A	222545	0.860141	-2.04146	0.654663	-2.61157	0.00901282	0.0182816
1170	ENSG00000173702	MUC13	56667	6057.49	-4.9646	0.376897	-13.2061	8.09453e-40	9.08878e-38
1171	ENSG00000173811	CCDC13-AS1	100874114	11.7336	-2.1912	0.27057	-5.16274	2.43358e-07	1.09121e-06
1172	ENSG00000173825	TIGD3	220359	40.4089	-2.11739	0.21292	-9.9349	2.93467e-23	8.24434e-22
1173	ENSG00000173826	KCNH6	81033	16.6177	-4.69186	0.430287	-7.84772	4.23679e-15	5.1281e-14
1174	ENSG00000173894	CBX2	84733	225.287	-2.66726	0.201443	-13.2374	5.33782e-40	6.10872e-38
1175	ENSG00000174015	CBY2	220082	5.8365	-4.03575	0.574275	-7.02673	2.11431e-12	1.8517e-11
1176	ENSG00000174059	CD34	947	1863.13	-2.07075	0.123279	-16.7971	2.563e-63	9.73559e-61
1177	ENSG00000174145	NWD2	57495	40.4497	-2.9412	0.453059	-5.76252	8.2868e-09	4.56195e-08
1178	ENSG00000174371	EXO1	9156	197.289	-3.56015	0.191442	-18.5794	4.71854e-77	4.212e-74
1179	ENSG00000174448	STARD6	147323	1.26476	-2.39826	0.438549	-4.1689	3.06078e-05	9.92989e-05
1180	ENSG00000174498	IGDCC3	9543	23.0877	-5.66157	0.464207	-9.47274	2.72595e-21	6.44161e-20
1181	ENSG00000174502	SLC26A9	115019	19.8898	-3.56721	0.370508	-4.66758	3.04764e-06	1.16334e-05
1182	ENSG00000174562	KLK15	55554	1.15479	-2.83521	0.596139	-3.10182	0.00192332	0.00449438
1183	ENSG00000174599	TRAM1L1	133022	39.2124	-2.87749	0.314595	-9.12914	6.90436e-20	1.39834e-18
1184	ENSG00000174607	UGT8	7368	20.8242	-2.11934	0.411098	-4.412	1.02421e-05	3.58887e-05
1185	ENSG00000174672	BRSK2	9024	46.7935	-3.33497	0.343537	-9.68477	3.49981e-22	8.91329e-21
1186	ENSG00000174697	LEP	3952	2.95778	-3.53502	0.475052	-2.77387	0.00553935	0.011764
1187	ENSG00000174837	ADGRE1	2015	46.688	2.02059	0.243182	8.30814	9.72119e-17	1.40813e-15
1188	ENSG00000174844	DNAH12	201625	41.4711	-2.60535	0.301891	-8.61892	6.75872e-18	1.10853e-16
1189	ENSG00000174899	SLC66A1L	152078	6.48073	-3.26596	0.474699	-5.00261	5.65604e-07	2.39993e-06
1190	ENSG00000174938	SEZ6L2	26470	1577.78	-3.33955	0.320325	-10.4334	1.74438e-25	6.03536e-24
1191	ENSG00000174939	ASPHD1	253982	301.376	-2.67325	0.321673	-8.31392	9.25915e-17	1.34503e-15
1192	ENSG00000174963	ZIC4	84107	92.6187	-3.21431	0.404096	-7.96088	1.70818e-15	2.15979e-14
1193	ENSG00000175003	SLC22A1	6580	14852.6	2.31123	0.326909	7.06565	1.59866e-12	1.42384e-11
1194	ENSG00000175063	UBE2C	11065	646.889	-4.05237	0.215425	-18.8054	6.82652e-79	6.98174e-76
1195	ENSG00000175093	SPSB4	92369	8.80287	2.59661	0.318898	8.14025	3.94452e-16	5.33093e-15
1196	ENSG00000175305	CCNE2	9134	94.8561	-2.07462	0.187017	-11.089	1.41893e-28	6.64885e-27
1197	ENSG00000175329	ISX	91464	311.239	-6.65749	0.447536	-14.8045	1.36997e-49	2.73276e-47
1198	ENSG00000175336	APOF	319	5500.21	2.81246	0.28075	10.0137	1.32644e-23	3.80417e-22
1199	ENSG00000175356	SCUBE2	57758	118.134	-2.13108	0.27992	-3.97656	6.99198e-05	0.000213966
1200	ENSG00000175426	PCSK1	5122	10.4789	-6.82035	0.27587	-3.88474	0.000102439	0.000305061
1201	ENSG00000175445	LPL	4023	158.887	-2.44659	0.19088	-10.7182	8.36068e-27	3.32805e-25
1202	ENSG00000175664	TEX26	122046	2.42403	3.58866	0.442297	8.10011	5.49075e-16	7.31267e-15
1203	ENSG00000175699	CCDC197	256369	1.55718	-2.39298	0.565615	-3.83491	0.000125612	0.000368173
1204	ENSG00000175793	SFN	2810	1393.58	-3.7285	0.308664	-12.0873	1.23273e-33	8.87416e-32
1205	ENSG00000175832	ETV4	2118	934.706	-2.92475	0.282172	-10.3685	3.44975e-25	1.15334e-23
1206	ENSG00000175874	CREG2	200407	11.0821	-3.14573	0.310252	-10.0283	1.14489e-23	3.3074e-22
1207	ENSG00000175879	HOXD8	3234	43.9081	-3.04399	0.245358	-12.3737	3.62909e-35	2.97202e-33
1208	ENSG00000175946	KLHL38	340359	6.53166	-2.93676	0.378699	-7.06473	1.60926e-12	1.43256e-11
1209	ENSG00000176076	KCNE5	23630	40.1559	-3.0723	0.311448	-9.83957	7.60365e-23	2.06775e-21
1210	ENSG00000176092	CRYBG2	55057	143.862	-2.51135	0.216294	-11.606	3.84012e-31	2.30834e-29
1211	ENSG00000176170	SPHK1	8877	904.099	-2.08494	0.295334	-7.06191	1.64224e-12	1.46047e-11
1212	ENSG00000176177	ENTHD1	150350	1.38347	-2.19512	0.457096	-3.35313	0.000799044	0.00201545
1213	ENSG00000176406	RIMS2	9699	14.0639	-2.87843	0.379552	-5.73773	9.59566e-09	5.23888e-08
1214	ENSG00000176490	DIRAS1	148252	66.2639	-3.39923	0.36306	-9.35138	8.65119e-21	1.9391e-19
1215	ENSG00000176566	DCAF4L2	138009	419.355	-7.70009	0.627663	-12.7033	5.6721e-37	5.21979e-35
1216	ENSG00000176595	KBTBD11	9920	363.956	2.30449	0.263242	8.75217	2.0929e-18	3.63291e-17
1217	ENSG00000176746	MAGEB6	158809	2.49189	-3.23443	0.619097	-4.97697	6.45865e-07	2.7182e-06
1218	ENSG00000176840	MIR7-3HG	284424	1.48508	-2.01008	0.436979	-2.36556	0.0180027	0.0340648
1219	ENSG00000176884	GRIN1	2902	5.80861	-2.93656	0.385831	-6.4418	1.18063e-10	8.2945e-10
1220	ENSG00000176887	SOX11	6664	9.64238	-3.43253	0.43442	-7.80991	5.72307e-15	6.83437e-14
1221	ENSG00000176907	TCIM	56892	2382.68	2.23804	0.188556	11.8687	1.72208e-32	1.14291e-30
1222	ENSG00000176909	MAMSTR	284358	60.4412	-2.00402	0.192725	-10.3923	2.68707e-25	9.12021e-24
1223	ENSG00000176920	FUT2	2524	115.857	-2.92675	0.281615	-10.3873	2.83335e-25	9.58027e-24
1224	ENSG00000176956	LY6H	4062	27.5911	-4.23199	0.328435	-12.732	3.92432e-37	3.68581e-35
1225	ENSG00000177182	CLVS1	157807	23.0449	-2.7472	0.265968	-8.79945	1.37485e-18	2.4411e-17
1226	ENSG00000177238	TRIM72	493829	7.66749	-2.49137	0.293372	-4.79972	1.5889e-06	6.31846e-06
1227	ENSG00000177359	OVOS2	144203	5.12066	-3.60081	0.380098	-5.5545	2.7841e-08	1.42624e-07
1228	ENSG00000177363	LRRN4CL	221091	7.47169	-2.14691	0.306482	-3.09093	0.00199532	0.00464923
1229	ENSG00000177414	UBE2U	148581	9.26327	-3.09908	0.584983	-4.9502	7.4137e-07	3.09245e-06
1230	ENSG00000177468	OLIG3	167826	1.70228	-3.09489	0.85486	-2.39024	0.0168373	0.0320705
1231	ENSG00000177494	ZBED2	79413	15.6961	-2.31896	0.357963	-6.45864	1.05645e-10	7.46966e-10
1232	ENSG00000177508	IRX3	79191	221.928	-2.43445	0.27977	-8.70247	3.24728e-18	5.52657e-17
1233	ENSG00000177519	RPRM	56475	2.17297	-2.7216	0.558931	-3.89699	9.7395e-05	0.000291084
1234	ENSG00000177551	NHLH2	4808	1.35665	-3.29615	0.662715	-2.87151	0.00408513	0.00893224
1235	ENSG00000177602	HASPIN	83903	33.8658	-2.68923	0.205502	-13.0564	5.84296e-39	6.26513e-37
1236	ENSG00000177679	SRRM3	222183	124.112	-3.44908	0.312496	-9.54587	1.34966e-21	3.26941e-20
1237	ENSG00000177699	LOC100129540	100129540	4.52093	-2.5017	0.383241	-5.57936	2.41405e-08	1.24579e-07
1238	ENSG00000177910	SPATA31C2	645961	2.14292	-3.04019	0.627443	-4.17559	2.97213e-05	9.66524e-05
1239	ENSG00000178217	SH2D4B	387694	3.36838	-2.8801	0.361925	-7.26098	3.84283e-13	3.68157e-12
1240	ENSG00000178233	TMEM151B	441151	1.7924	-2.45673	0.337285	-7.28387	3.24382e-13	3.14482e-12
1241	ENSG00000178235	SLITRK1	114798	3.29043	-2.73653	0.670563	-3.16975	0.00152573	0.00363863
1242	ENSG00000178395	CCDC185	164127	4.82614	-3.42418	0.540089	-6.33377	2.39237e-10	1.6206e-09
1243	ENSG00000178462	TUBAL3	79861	3.01178	-2.41783	0.566266	-4.00979	6.07719e-05	0.000187677
1244	ENSG00000178522	AMBN	258	5.53067	-6.30652	0.648016	-5.86577	4.47053e-09	2.55195e-08
1245	ENSG00000178531	CTXN1	404217	33.3151	-2.29207	0.277169	-7.34034	2.13054e-13	2.10904e-12
1246	ENSG00000178538	CA8	767	20.3671	-2.26525	0.286769	-6.8733	6.27326e-12	5.2043e-11
1247	ENSG00000178597	PSAPL1	768239	5.36286	-2.87145	0.527059	-3.8861	0.000101868	0.000303487
1248	ENSG00000178623	GPR35	2859	235.12	-2.93431	0.294812	-9.95374	2.42872e-23	6.85532e-22
1249	ENSG00000178752	ERFE	151176	63.3481	-2.63311	0.214561	-12.2587	1.50862e-34	1.16343e-32
1250	ENSG00000178773	CPNE7	27132	136.825	-2.65023	0.296253	-8.9443	3.74312e-19	7.09329e-18
1251	ENSG00000178776	C5orf46	389336	27.73	-3.71289	0.330088	-11.1623	6.23671e-29	3.0589e-27
1252	ENSG00000178860	MSC	9242	659.965	-2.49852	0.315956	-7.52153	5.41393e-14	5.73279e-13
1253	ENSG00000178882	RFLNA	144347	51.8151	-4.43241	0.339077	-9.63955	5.4426e-22	1.35613e-20
1254	ENSG00000178999	AURKB	9212	357.542	-3.52301	0.203593	-17.2972	4.94061e-67	2.63298e-64
1255	ENSG00000179083	FAM133A	286499	144.675	-4.99051	0.461925	-10.8087	3.13097e-27	1.29392e-25
1256	ENSG00000179097	HTR1F	3355	1.40486	-2.34332	0.393418	-4.38896	1.13894e-05	3.96287e-05
1257	ENSG00000179270	PCARE	388939	1.5379	-2.35454	0.66879	-3.1226	0.00179261	0.00421458
1258	ENSG00000179284	DAND5	199699	6.90696	-2.91179	0.332503	-8.65093	5.10823e-18	8.48741e-17
1259	ENSG00000179292	TMEM151A	256472	65.1902	-2.44695	0.298341	-6.18564	6.18504e-10	3.97271e-09
1260	ENSG00000179388	EGR3	1960	79.1363	2.09788	0.217856	9.629	6.03164e-22	1.50081e-20
1261	ENSG00000179455	MKRN3	7681	27.7613	-3.79349	0.364093	-10.3415	4.57376e-25	1.50934e-23
1262	ENSG00000179520	SLC17A8	246213	8.87251	2.33582	0.358205	6.51716	7.1651e-11	5.17993e-10
1263	ENSG00000179546	HTR1D	3352	97.8319	-4.0329	0.416966	-8.93105	4.21973e-19	7.9551e-18
1264	ENSG00000179580	RNF151	146310	1.12185	-2.69432	0.338467	-4.12575	3.69534e-05	0.000118411
1265	ENSG00000179593	ALOX15B	247	90.0268	-3.11059	0.342337	-8.33641	7.65798e-17	1.12479e-15
1266	ENSG00000179636	TPPP2	122664	89.4953	2.1241	0.244885	8.67274	4.21856e-18	7.07173e-17
1267	ENSG00000179673	RPRML	388394	7.60453	-3.06975	0.419885	-6.53813	6.22946e-11	4.53567e-10
1268	ENSG00000179772	FOXS1	2307	105.518	-2.81171	0.220886	-12.7203	4.55829e-37	4.22749e-35
1269	ENSG00000179846	NKPD1	284353	4.88888	-2.35665	0.324312	-6.22151	4.92405e-10	3.20485e-09
1270	ENSG00000179914	ITLN1	55600	42.2033	2.55276	0.360432	7.07592	1.48462e-12	1.32724e-11
1271	ENSG00000179915	NRXN1	9378	5.06012	2.10186	0.440423	4.76544	1.8844e-06	7.40611e-06
1272	ENSG00000179930	ZNF648	127665	63.8001	-2.17076	0.324427	-6.69012	2.22991e-11	1.71708e-10
1273	ENSG00000180061	TMEM150B	284417	467.961	-2.19039	0.228154	-9.60096	7.92001e-22	1.95704e-20
1274	ENSG00000180318	ALX1	8092	3.53294	-3.66243	0.793963	-3.81247	0.000137587	0.000400676
1275	ENSG00000180438	TPRXL	348825	9.97697	-3.03669	0.423814	-6.32931	2.46253e-10	1.66434e-09
1276	ENSG00000180730	SHISA2	387914	18.075	-2.34413	0.316167	-7.39382	1.42667e-13	1.44431e-12
1277	ENSG00000180785	OR51E1	143503	24.0802	-3.02199	0.215159	-13.982	2.00846e-44	2.97568e-42
1278	ENSG00000180806	HOXC9	3225	32.8057	-5.33294	0.517892	-10.1983	2.0186e-24	6.22958e-23
1279	ENSG00000180818	HOXC10	3226	21.361	-4.23335	0.628288	-5.11463	3.1435e-07	1.38896e-06
1280	ENSG00000180861	LINC01559	283422	10.352	-3.43241	0.5081	-3.98254	6.8183e-05	0.000209027
1281	ENSG00000180871	CXCR2	3579	20.7372	2.2224	0.253498	8.76644	1.84401e-18	3.22124e-17
1282	ENSG00000181019	NQO1	1728	7977.75	-4.61898	0.349262	-13.2476	4.66075e-40	5.38565e-38
1283	ENSG00000181072	CHRM2	1129	14.3196	3.56252	0.447384	7.9376	2.06127e-15	2.58607e-14
1284	ENSG00000181092	ADIPOQ	9370	1.48577	-3.93221	0.656674	-2.55862	0.0105087	0.0209857
1285	ENSG00000181218	H2AW	92815	104.273	-2.63649	0.328539	-8.02444	1.01987e-15	1.3194e-14
1286	ENSG00000181408	UTS2R	2837	1.87045	-2.64825	0.487785	-4.32253	1.54253e-05	5.25348e-05
1287	ENSG00000181418	DDN	23109	6.4333	-2.10545	0.356959	-5.86626	4.45739e-09	2.54567e-08
1288	ENSG00000181433	SAGE1	55511	3.52036	-4.13536	0.722839	-3.71161	0.000205943	0.000580516
1289	ENSG00000181449	SOX2	6657	20.782	-3.13766	0.466291	-7.45001	9.33335e-14	9.61779e-13
1290	ENSG00000181544	FANCB	2187	19.1231	-2.22603	0.204179	-10.8758	1.50375e-27	6.38442e-26
1291	ENSG00000181617	FDCSP	260436	63.105	-4.93759	0.510021	-7.20003	6.01981e-13	5.65491e-12
1292	ENSG00000182010	RTKN2	219790	70.8583	-2.80078	0.240044	-11.6541	2.18653e-31	1.35307e-29
1293	ENSG00000182035	ADIG	149685	5.51498	-2.27986	0.426894	-5.29555	1.1866e-07	5.57486e-07
1294	ENSG00000182040	USH1G	124590	3.64812	-3.28125	0.510721	-5.47463	4.38423e-08	2.18636e-07
1295	ENSG00000182050	MGAT4C	25834	31.2575	-2.28461	0.329931	-2.32907	0.0198555	0.0371768
1296	ENSG00000182111	ZNF716	441234	16.4413	-4.93319	0.594047	-8.31897	8.87311e-17	1.29316e-15
1297	ENSG00000182272	B4GALNT4	338707	123.663	-3.49052	0.417817	-7.87913	3.2967e-15	4.04508e-14
1298	ENSG00000182308	DCAF4L1	285429	17.2358	-2.45792	0.235501	-8.87003	7.31267e-19	1.34038e-17
1299	ENSG00000182330	PRAMEF8	391002	4.97452	-3.47109	0.54095	-5.4682	4.54623e-08	2.26209e-07
1300	ENSG00000182366	FAM87A	157693	7.74306	-3.03382	0.412553	-7.26695	3.67691e-13	3.53399e-12
1301	ENSG00000182379	NXPH4	11247	266.068	-5.50581	0.337333	-16.2731	1.53285e-59	4.97564e-57
1302	ENSG00000182389	CACNB4	785	37.7719	-2.93922	0.291943	-9.69378	3.20444e-22	8.1844e-21
1303	ENSG00000182459	TEX19	400629	10.0694	-4.54941	0.392682	-11.5657	6.15041e-31	3.6179e-29
1304	ENSG00000182566	CLEC4G	339390	537.123	5.1824	0.36699	14.0918	4.267e-45	6.74149e-43
1305	ENSG00000182583	VCX	26609	12.5983	-5.01409	0.55924	-8.96476	3.10949e-19	5.94048e-18
1306	ENSG00000182601	HS3ST4	9951	19.0706	-4.56748	0.704458	-4.57132	4.8467e-06	1.79165e-05
1307	ENSG00000182632	CCNYL2	414194	1.33347	-2.5481	0.655865	-2.4641	0.0137357	0.0266736
1308	ENSG00000182667	NTM	50863	89.1417	-2.86675	0.322693	-8.88016	6.67635e-19	1.22626e-17
1309	ENSG00000182759	MAFA	389692	68.9568	-6.20331	0.446694	-11.9894	4.03898e-33	2.79488e-31
1310	ENSG00000182798	MAGEB17	645864	64.7628	-6.21519	0.487386	-12.2091	2.78091e-34	2.10371e-32
1311	ENSG00000182938	OTOP3	347741	4.26242	-4.26003	0.693384	-4.66485	3.08836e-06	1.178e-05
1312	ENSG00000182963	GJC1	10052	197.671	-2.32976	0.169194	-13.7665	4.05619e-43	5.67962e-41
1313	ENSG00000182968	SOX1	6656	1.15538	-2.76055	0.675212	-2.54345	0.0109764	0.0218159
1314	ENSG00000183010	PYCR1	5831	912.358	-2.4597	0.279427	-8.80517	1.30657e-18	2.32564e-17
1315	ENSG00000183036	PCP4	5121	14.4035	-5.22203	0.54016	-5.63816	1.71874e-08	9.06892e-08
1316	ENSG00000183072	NKX2-5	1482	2.73898	-3.595	0.602256	-4.29411	1.75395e-05	5.91767e-05
1317	ENSG00000183091	NEB	4703	913.527	-2.84088	0.284284	-9.99636	1.58099e-23	4.50884e-22
1318	ENSG00000183117	CSMD1	64478	111.721	-6.02082	0.475077	-12.5481	4.0713e-36	3.54561e-34
1319	ENSG00000183150	GPR19	2842	21.1124	-2.48243	0.223735	-11.0617	1.92336e-28	8.91889e-27
1320	ENSG00000183154	LOC102723701	102723701	37.3715	2.28354	0.229198	9.96277	2.21802e-23	6.27549e-22
1321	ENSG00000183166	CALN1	83698	10.954	2.5198	0.432813	5.81097	6.2111e-09	3.47389e-08
1322	ENSG00000183185	GABRR3	200959	32.1924	-3.76211	0.429413	-8.7192	2.80178e-18	4.78891e-17
1323	ENSG00000183196	CHST6	4166	9.60262	-2.69061	0.317847	-7.5623	3.9599e-14	4.27037e-13
1324	ENSG00000183230	CTNNA3	29119	120.259	2.14975	0.319767	6.7196	1.82224e-11	1.42032e-10
1325	ENSG00000183242	WT1-AS	51352	8.35182	-2.33181	0.465284	-3.9581	7.55493e-05	0.000230011
1326	ENSG00000183248	PRR36	80164	91.2142	-2.32418	0.251545	-9.2366	2.54446e-20	5.38864e-19
1327	ENSG00000183287	CCBE1	147372	100.479	3.41847	0.306214	11.1564	6.66355e-29	3.25039e-27
1328	ENSG00000183304	FAM9A	171482	3.36371	-2.22954	0.595809	-2.87815	0.00400009	0.00876188
1329	ENSG00000183317	EPHA10	284656	51.6866	-3.28971	0.386744	-8.49473	1.98395e-17	3.10833e-16
1330	ENSG00000183324	REC114	283677	1.61939	-3.14318	0.454375	-3.98144	6.85004e-05	0.000209928
1331	ENSG00000183434	TFDP3	51270	31.0325	-5.24285	0.764108	-7.87641	3.36931e-15	4.12992e-14
1332	ENSG00000183454	GRIN2A	2903	48.7819	-2.6719	0.392777	-7.70874	1.27066e-14	1.45651e-13
1333	ENSG00000183625	CCR3	1232	15.5779	-3.51514	0.436152	-7.01869	2.23954e-12	1.95435e-11
1334	ENSG00000183671	GPR1	2825	6.14236	-3.03308	0.365832	-5.77749	7.58245e-09	4.1936e-08
1335	ENSG00000183690	EFHC2	80258	8.18551	-2.29894	0.408142	-5.36244	8.21037e-08	3.94987e-07
1336	ENSG00000183763	TRAIP	10293	161.573	-2.7895	0.166129	-16.7825	3.2771e-63	1.23171e-60
1337	ENSG00000183770	FOXL2	668	2.11042	-2.2867	0.526292	-2.25641	0.0240449	0.0440936
1338	ENSG00000183783	KCTD8	386617	1.36901	-2.14161	0.597703	-2.49751	0.012507	0.0245155
1339	ENSG00000183837	PNMA3	29944	256.638	-3.54175	0.34776	-10.1892	2.21521e-24	6.81277e-23
1340	ENSG00000183844	FAM3B	54097	847.517	-2.84851	0.366363	-7.78439	7.00525e-15	8.26874e-14
1341	ENSG00000183850	ZNF730	100129543	5.96184	-2.71863	0.412621	-6.51187	7.42226e-11	5.34852e-10
1342	ENSG00000183856	IQGAP3	128239	732.405	-3.36838	0.195655	-17.2138	2.09242e-66	1.06732e-63
1343	ENSG00000183873	SCN5A	6331	4.46371	-2.09071	0.292166	-3.77203	0.000161924	0.000465586
1344	ENSG00000183888	SRARP	149563	57.8985	-4.83977	0.502377	-9.42671	4.23141e-21	9.7854e-20
1345	ENSG00000183908	LRRC55	219527	24.5663	2.71158	0.261427	10.3706	3.37432e-25	1.13024e-23
1346	ENSG00000184029	DSCR4	10281	16.7952	-4.9269	0.756654	-8.97804	2.75624e-19	5.29964e-18
1347	ENSG00000184106	TREML3P	340206	21.9823	-4.39993	0.487773	-7.9049	2.68157e-15	3.31997e-14
1348	ENSG00000184156	KCNQ3	3786	24.075	-2.0578	0.248755	-8.25932	1.46505e-16	2.07996e-15
1349	ENSG00000184160	ADRA2C	152	251.949	-3.22466	0.292903	-11.0095	3.4397e-28	1.5586e-26
1350	ENSG00000184261	KCNK12	56660	3.73779	-3.5467	0.411863	-5.55659	2.75089e-08	1.41045e-07
1351	ENSG00000184357	H1-5	3009	3.39063	-2.95188	0.374806	-7.84227	4.42461e-15	5.34094e-14
1352	ENSG00000184368	MAP7D2	256714	133.316	-3.53829	0.371056	-8.77668	1.68365e-18	2.95558e-17
1353	ENSG00000184374	COLEC10	10584	258.366	3.84529	0.296966	12.94	2.67463e-38	2.76013e-36
1354	ENSG00000184434	LRRC19	64922	34.6697	2.13704	0.325553	6.56126	5.33558e-11	3.92323e-10
1355	ENSG00000184478	OR56A3	390083	2.82092	-3.31032	0.687378	-4.36585	1.26628e-05	4.37356e-05
1356	ENSG00000184486	POU3F2	5454	7.5333	-3.45225	0.405514	-7.50041	6.36183e-14	6.68104e-13
1357	ENSG00000184489	PTP4A3	11156	1236.51	-2.53502	0.210154	-12.0634	1.6493e-33	1.18253e-31
1358	ENSG00000184502	GAST	2520	8.13337	-6.0802	0.699424	-5.8946	3.75601e-09	2.16449e-08
1359	ENSG00000184524	CEND1	51286	10.8867	-2.28426	0.272064	-8.35705	6.43047e-17	9.53515e-16
1360	ENSG00000184544	DHRS7C	201140	0.511278	2.79873	0.590362	4.71109	2.46397e-06	9.53905e-06
1361	ENSG00000184557	SOCS3	9021	2352.93	2.29105	0.22012	10.407	2.30391e-25	7.89475e-24
1362	ENSG00000184564	SLITRK6	84189	10.867	2.68824	0.423212	6.34029	2.29337e-10	1.55788e-09
1363	ENSG00000184601	C14orf180	400258	39.9347	2.63292	0.464284	5.65434	1.56447e-08	8.3077e-08
1364	ENSG00000184661	CDCA2	157313	102.023	-3.1451	0.212657	-14.7721	2.21639e-49	4.3245e-47
1365	ENSG00000184709	LRRC26	389816	7.48775	-3.70456	0.497021	-7.12367	1.05092e-12	9.57006e-12
1366	ENSG00000184735	DDX53	168400	25.989	-5.86548	0.622388	-9.42927	4.12942e-21	9.56195e-20
1367	ENSG00000184999	SLC22A10	387775	1417.85	2.27092	0.267747	8.47935	2.26446e-17	3.50476e-16
1368	ENSG00000185002	RFX6	222546	6.33744	-3.42885	0.480368	-5.36037	8.30501e-08	3.99271e-07
1369	ENSG00000185046	ANKS1B	56899	61.1947	-2.57565	0.297294	-8.65787	4.80643e-18	8.0046e-17
1370	ENSG00000185105	MYADML2	255275	2.35588	-2.6659	0.406193	-6.56297	5.27473e-11	3.88178e-10
1371	ENSG00000185130	H2BC13	8340	3.19353	-2.39562	0.356528	-6.65582	2.81726e-11	2.14438e-10
1372	ENSG00000185133	INPP5J	27124	52.94	-2.045	0.244478	-8.35998	6.27291e-17	9.317e-16
1373	ENSG00000185247	MAGEA11	4110	11.3864	-5.38895	0.719715	-6.20613	5.43042e-10	3.51584e-09
1374	ENSG00000185269	NOTUM	147111	4545.04	-2.10504	0.380192	-5.54296	2.97401e-08	1.51743e-07
1375	ENSG00000185306	C12orf56	115749	24.4411	-4.13302	0.464864	-8.80081	1.35835e-18	2.4142e-17
1376	ENSG00000185467	KPNA7	402569	58.0787	-2.10324	0.24044	-8.74255	2.27913e-18	3.94085e-17
1377	ENSG00000185480	PARPBP	55010	139.397	-2.66694	0.167996	-15.8664	1.08191e-56	3.11539e-54
1378	ENSG00000185559	DLK1	8788	2364.12	-6.01262	0.59734	-9.11453	7.9013e-20	1.59302e-18
1379	ENSG00000185567	AHNAK2	113146	208.17	-2.00544	0.31404	-4.99866	5.77306e-07	2.44726e-06
1380	ENSG00000185585	OLFML2A	169611	456.62	-2.37942	0.165227	-14.3996	5.20748e-47	9.20486e-45
1381	ENSG00000185615	PDIA2	64714	56.1337	-5.83406	0.388485	-11.3978	4.28574e-30	2.32563e-28
1382	ENSG00000185633	NDUFA4L2	56901	1190.7	-2.82184	0.198617	-14.2078	8.19567e-46	1.34855e-43
1383	ENSG00000185652	NTF3	4908	60.2352	3.43598	0.246006	13.9639	2.58743e-44	3.81764e-42
1384	ENSG00000185664	PMEL	6490	260.452	-2.10156	0.144066	3.69613	0.000218911	0.000613535
1385	ENSG00000185666	SYN3	8224	30.791	-2.58984	0.272947	-9.47018	2.79349e-21	6.59686e-20
1386	ENSG00000185674	LYG2	254773	6.09741	-2.48588	0.323162	-7.0855	1.38539e-12	1.24382e-11
1387	ENSG00000185686	PRAME	23532	402.83	-6.07138	0.539371	-11.3972	4.31743e-30	2.33928e-28
1388	ENSG00000185818	NAT8L	339983	36.9304	-3.44593	0.308735	-7.02595	2.12618e-12	1.86072e-11
1389	ENSG00000185915	KLHL34	257240	25.3795	-2.56828	0.416011	-6.16588	7.00939e-10	4.47483e-09
1390	ENSG00000185940	KRTAP5-5	439915	5.21338	-4.23582	0.623779	-6.24167	4.32931e-10	2.83585e-09
1391	ENSG00000185988	PLK5	126520	6.87242	-2.17451	0.3223	-6.70676	1.98994e-11	1.54429e-10
1392	ENSG00000186051	TAL2	6887	6.73624	-2.54161	0.312278	-8.06199	7.50638e-16	9.84654e-15
1393	ENSG00000186150	UBL4B	164153	2.40101	-3.04939	0.512516	-5.34355	9.11435e-08	4.35833e-07
1394	ENSG00000186185	KIF18B	146909	260.972	-3.97505	0.211068	-18.8148	5.71087e-79	6.17916e-76
1395	ENSG00000186191	BPIFB4	149954	10.4065	-4.08008	0.46584	-8.71288	2.96255e-18	5.05885e-17
1396	ENSG00000186193	SAPCD2	89958	137.41	-2.71549	0.232185	-11.6907	1.42247e-31	8.92628e-30
1397	ENSG00000186197	EDARADD	128178	68.8169	-2.15908	0.289438	-7.45717	8.84022e-14	9.12544e-13
1398	ENSG00000186326	RGS9BP	388531	3.76421	-2.66762	0.342854	-7.71679	1.19295e-14	1.37007e-13
1399	ENSG00000186417	GLDN	342035	212.397	-3.72208	0.336722	-11.0542	2.09275e-28	9.66672e-27
1400	ENSG00000186431	FCAR	2204	5.71375	2.00814	0.271389	7.40156	1.34592e-13	1.36566e-12
1401	ENSG00000186458	DEFB132	400830	56.8866	-2.50075	0.392124	-5.39695	6.77824e-08	3.30003e-07
1402	ENSG00000186471	AKAP14	158798	2.56374	-2.77552	0.450179	-6.16557	7.02304e-10	4.48275e-09
1403	ENSG00000186493	C5orf38	153571	1.05515	-3.49133	0.500437	-2.7173	0.00658164	0.0137421
1404	ENSG00000186510	CLCNKA	1187	37.8158	-2.57761	0.306329	-8.40327	4.34227e-17	6.53372e-16
1405	ENSG00000186526	CYP4F8	11283	1.29102	-2.15911	0.480501	-3.29571	0.000981717	0.00243374
1406	ENSG00000186564	FOXD2	2306	109.536	-2.07223	0.186804	-11.0896	1.40898e-28	6.6109e-27
1407	ENSG00000186603	HPDL	84842	21.4212	-2.24632	0.285732	-7.84474	4.33841e-15	5.24398e-14
1408	ENSG00000186806	VSIG10L	147645	409.512	-2.04524	0.238164	-8.58798	8.85119e-18	1.43264e-16
1409	ENSG00000186827	TNFRSF4	7293	156.792	-2.31152	0.160943	-14.3577	9.5386e-47	1.64534e-44
1410	ENSG00000186867	QRFPR	84109	4.78318	-2.13453	0.395697	-4.77457	1.80089e-06	7.10525e-06
1411	ENSG00000186868	MAPT	4137	328.657	-2.94704	0.209487	-14.0652	6.2184e-45	9.69581e-43
1412	ENSG00000186871	ERCC6L	54821	64.2899	-3.15341	0.20171	-15.6031	6.93313e-55	1.82025e-52
1413	ENSG00000186895	FGF3	2248	0.798096	-3.20703	0.622329	-2.56836	0.0102182	0.0204518
1414	ENSG00000186897	C1QL4	338761	16.7718	-3.99004	0.406927	-9.37229	7.09774e-21	1.61011e-19
1415	ENSG00000186912	P2RY4	5030	2.28583	-3.03325	0.469826	-4.94498	7.61529e-07	3.17172e-06
1416	ENSG00000186973	FAM183A	440585	12.3326	-2.01306	0.424102	-4.73875	2.15044e-06	8.39075e-06
1417	ENSG00000187013	C17orf82	388407	26.3122	-2.94283	0.224247	-13.0745	4.60357e-39	4.98106e-37
1418	ENSG00000187048	CYP4A11	1579	20698.6	2.21696	0.237033	9.35147	8.64395e-21	1.9387e-19
1419	ENSG00000187116	LILRA5	353514	76.2125	2.13096	0.193132	11.0335	2.63499e-28	1.20006e-26
1420	ENSG00000187144	SPATA21	374955	91.2019	-2.37732	0.334851	-7.09904	1.2563e-12	1.13506e-11
1421	ENSG00000187166	H1-7	341567	2.21701	-2.84574	0.506229	-5.02331	5.07887e-07	2.17129e-06
1422	ENSG00000187172	BAGE2	85319	17.8107	-5.38269	0.627457	-8.57699	9.73888e-18	1.57062e-16
1423	ENSG00000187193	MT1X	4501	14068.5	2.47151	0.313019	7.89144	2.98724e-15	3.68183e-14
1424	ENSG00000187242	KRT12	3859	19.0024	-6.11621	0.605658	-7.85864	3.88326e-15	4.72582e-14
1425	ENSG00000187268	FAM9C	171484	0.886954	-2.12191	0.408382	-2.60178	0.00927419	0.0187596
1426	ENSG00000187323	DCC	1630	17.4694	-3.89863	0.423644	-6.88268	5.87376e-12	4.8922e-11
1427	ENSG00000187398	LUZP2	338645	16.0406	-4.05148	0.414965	-6.32	2.61556e-10	1.7621e-09
1428	ENSG00000187416	LHFPL3	375612	4.09267	-2.0069	0.480536	-2.61984	0.00879719	0.0178839
1429	ENSG00000187616	MYMK	389827	3.51443	-2.057	0.417094	-2.27596	0.0228487	0.0421555
1430	ENSG00000187672	ERC2	26059	9.81329	-2.97508	0.407107	-7.2357	4.63125e-13	4.40382e-12
1431	ENSG00000187690	EZHIP	340602	5.41601	-4.65351	0.654821	-5.52565	3.28272e-08	1.66472e-07
1432	ENSG00000187715	KBTBD12	166348	4.53117	-2.83768	0.461246	-3.95102	7.78197e-05	0.000236439
1433	ENSG00000187730	GABRD	2563	164.836	-4.46692	0.192125	-23.1895	5.80784e-119	1.03687e-114
1434	ENSG00000187772	LIN28B	389421	91.615	-7.08534	0.698974	-12.8473	8.90417e-38	8.75847e-36
1435	ENSG00000187783	TMEM72	643236	26.4148	-2.37006	0.367002	-5.30735	1.11229e-07	5.24575e-07
1436	ENSG00000187848	P2RX2	22953	6.97439	-2.31651	0.462554	-4.76021	1.93392e-06	7.59235e-06
1437	ENSG00000187908	DMBT1	1755	34.2722	-5.74102	0.436413	-8.17522	2.95322e-16	4.06193e-15
1438	ENSG00000187951	LOC100288637	100288637	77.9267	-2.09244	0.172449	-12.1271	7.59035e-34	5.54235e-32
1439	ENSG00000187957	DNER	92737	37.248	-6.40803	0.510639	-8.85298	8.52122e-19	1.5476e-17
1440	ENSG00000187997	C17orf99	100141515	2.70331	-2.44421	0.420064	-5.79323	6.90438e-09	3.84e-08
1441	ENSG00000188032	C19orf67	646457	4.51917	-2.5318	0.340389	-7.35357	1.92987e-13	1.92052e-12
1442	ENSG00000188037	CLCN1	1180	14.2751	-2.04882	0.31769	-6.43485	1.23596e-10	8.64976e-10
1443	ENSG00000188056	TREML4	285852	3.81464	-2.51787	0.501002	-3.94011	8.14426e-05	0.000246586
1444	ENSG00000188095	MESP2	145873	56.4118	-3.3318	0.231537	-14.3534	1.0146e-46	1.7417e-44
1445	ENSG00000188130	MAPK12	6300	470.854	-2.15986	0.215462	-10.0244	1.19122e-23	3.4329e-22
1446	ENSG00000188162	OTOG	340990	12.4755	-5.74157	0.556814	-7.6798	1.59337e-14	1.80327e-13
1447	ENSG00000188175	HEPACAM2	253012	2.32669	-2.91378	0.418798	-3.00699	0.00263846	0.00600325
1448	ENSG00000188517	COL25A1	84570	19.6904	2.61125	0.292726	8.91794	4.7506e-19	8.89486e-18
1449	ENSG00000188580	NKAIN2	154215	42.5342	-2.12994	0.371347	-5.7356	9.7166e-09	5.30166e-08
1450	ENSG00000188610	FAM72B	653820	19.3833	-2.21777	0.220749	-10.0228	1.21029e-23	3.48223e-22
1451	ENSG00000188613	NANOS1	340719	66.9359	-2.61209	0.247286	-10.5533	4.90582e-26	1.79659e-24
1452	ENSG00000188620	HMX3	340784	1.21926	-2.64531	0.718227	-2.50003	0.0124185	0.0243634
1453	ENSG00000188763	FZD9	8326	33.0897	-2.33705	0.362013	-5.53718	3.07373e-08	1.56455e-07
1454	ENSG00000188816	HMX2	3167	1.25668	-2.71152	0.70864	-2.88927	0.00386143	0.00848795
1455	ENSG00000189023	MAGEB16	139604	2.67499	-3.59951	0.769215	-3.69411	0.000220658	0.000617947
1456	ENSG00000189057	FAM111B	374393	311.236	-2.55568	0.195636	-13.0613	5.47812e-39	5.89161e-37
1457	ENSG00000189064	GAGE2B	645037	4.72057	-4.43694	0.775807	-4.3908	1.12935e-05	3.93257e-05
1458	ENSG00000189108	IL1RAPL2	26280	20.4475	2.01238	0.306999	6.55331	5.62771e-11	4.12191e-10
1459	ENSG00000189120	SP6	80320	53.9569	-3.04917	0.242574	-12.0532	1.86648e-33	1.32494e-31
1460	ENSG00000189127	ANKRD34B	340120	3.65685	-2.71716	0.503845	-3.99615	6.43807e-05	0.000198068
1461	ENSG00000189186	DCAF8L2	347442	22.7601	-5.70076	0.639933	-8.90454	5.36076e-19	9.95379e-18
1462	ENSG00000189275	LINC01164	399827	2.56176	-3.94333	0.603929	-4.40466	1.05949e-05	3.7063e-05
1463	ENSG00000189320	FAM180A	389558	120.162	2.39381	0.329775	7.25437	4.03537e-13	3.85362e-12
1464	ENSG00000189325	BNIP5	389384	8.28985	-3.33881	0.439123	-5.80905	6.28271e-09	3.5101e-08
1465	ENSG00000189366	ALG1L	200810	294.379	-3.30355	0.264764	-12.476	1.00987e-35	8.50436e-34
1466	ENSG00000189377	CXCL17	284340	43.4369	-4.35535	0.351166	-8.50728	1.78062e-17	2.79959e-16
1467	ENSG00000196083	IL1RAP	3556	1900.12	2.04433	0.165951	12.3185	7.20561e-35	5.69211e-33
1468	ENSG00000196091	MYBPC1	4604	15.2897	-3.72435	0.296676	-9.46237	3.01038e-21	7.06233e-20
1469	ENSG00000196109	ZNF676	163223	28.9258	-2.67878	0.397661	-6.72747	1.72642e-11	1.35065e-10
1470	ENSG00000196155	PLEKHG4	25894	129.279	-2.19345	0.270303	-8.11382	4.90514e-16	6.56457e-15
1471	ENSG00000196169	KIF19	124602	25.8085	2.38051	0.218384	10.9007	1.14395e-27	4.90347e-26
1472	ENSG00000196172	ZNF681	148213	70.9101	-2.07913	0.234555	-8.85995	8.00505e-19	1.45905e-17
1473	ENSG00000196188	CTSE	1510	58.3224	-2.59142	0.424552	-2.86218	0.00420731	0.00916853
1474	ENSG00000196196	HRCT1	646962	399.679	-2.77995	0.264655	-10.5053	8.17059e-26	2.92031e-24
1475	ENSG00000196228	SULT1C3	442038	2.03753	-3.17794	0.656415	-3.9704	7.17534e-05	0.000219108
1476	ENSG00000196289	BECN2	441925	1.21133	-2.39516	0.479778	-4.59253	4.37904e-06	1.63026e-05
1477	ENSG00000196350	ZNF729	100287226	2.49495	-2.42691	0.662241	-3.69196	0.000222536	0.000622863
1478	ENSG00000196368	NUDT11	55190	6.11325	-2.3768	0.339495	-3.65596	0.000256223	0.000708214
1479	ENSG00000196421	C20orf204	284739	263.996	-4.92608	0.325236	-15.1254	1.10133e-51	2.5871e-49
1480	ENSG00000196460	RFX8	731220	18.8796	-2.71704	0.220526	-12.2683	1.33965e-34	1.03986e-32
1481	ENSG00000196517	SLC6A9	6536	225.572	-2.05216	0.220282	-9.31533	1.21575e-20	2.66972e-19
1482	ENSG00000196584	XRCC2	7516	102.237	-2.85982	0.188808	-15.1332	9.78154e-52	2.3284e-49
1483	ENSG00000196611	MMP1	4312	67.5908	-2.49299	0.302051	-6.25673	3.93123e-10	2.5903e-09
1484	ENSG00000196668	LINC00173	100287569	7.45605	-2.08388	0.299808	-6.91104	4.81097e-12	4.04761e-11
1485	ENSG00000196747	H2AC13	8329	9.8536	-3.51257	0.361584	-9.56649	1.10597e-21	2.70662e-20
1486	ENSG00000196748	CLPSL2	389383	1.91267	-2.86967	0.581628	-3.95535	7.64238e-05	0.000232455
1487	ENSG00000196767	POU3F4	5456	0.973894	-2.74485	0.746064	-2.24742	0.0246132	0.0450178
1488	ENSG00000196787	H2AC11	8969	163.001	-2.03304	0.284476	-7.14685	8.87928e-13	8.17123e-12
1489	ENSG00000196890	H2BU1	128312	10.8255	-2.99489	0.422045	-7.03437	2.00161e-12	1.75773e-11
1490	ENSG00000196917	HCAR1	27198	8.55866	-2.03958	0.302397	-5.3323	9.69763e-08	4.6132e-07
1491	ENSG00000196932	TMEM26	219623	44.7589	2.17955	0.176519	12.3476	5.0209e-35	4.04687e-33
1492	ENSG00000196990	FAM163B	642968	51.7924	2.22398	0.367415	6.04765	1.4697e-09	8.98275e-09
1493	ENSG00000197085	NPSR1-AS1	404744	47.336	-6.09512	0.479346	-12.496	7.84558e-36	6.70178e-34
1494	ENSG00000197106	SLC6A17	388662	7.19791	-2.94334	0.312388	-6.10505	1.02769e-09	6.42074e-09
1495	ENSG00000197123	ZNF679	168417	1.55105	-3.01026	0.739529	-2.96301	0.00304646	0.00684692
1496	ENSG00000197153	H3C12	8356	1.62188	-2.57738	0.361097	-7.13776	9.48638e-13	8.69183e-12
1497	ENSG00000197172	MAGEA6	4105	336.799	-6.69992	0.627521	-11.048	2.24223e-28	1.03e-26
1498	ENSG00000197273	GUCA2A	2980	22.9454	-2.71973	0.437805	-5.51942	3.40113e-08	1.72061e-07
1499	ENSG00000197299	BLM	641	144.139	-2.42755	0.187513	-12.9411	2.63969e-38	2.73197e-36
1500	ENSG00000197360	ZNF98	148198	5.81195	-2.25207	0.488663	-4.59231	4.38373e-06	1.63183e-05
1501	ENSG00000197408	CYP2B6	1555	8699.73	2.60596	0.282137	9.23309	2.62945e-20	5.55216e-19
1502	ENSG00000197409	H3C4	8351	30.1536	-2.20266	0.242091	-9.08596	1.02792e-19	2.05503e-18
1503	ENSG00000197472	ZNF695	57116	12.7891	-4.24249	0.457965	-9.16356	5.0213e-20	1.03397e-18
1504	ENSG00000197565	COL4A6	1288	26.9061	-2.30698	0.338079	-4.94001	7.81195e-07	3.2487e-06
1505	ENSG00000197580	BCO2	83875	555.369	3.05713	0.264586	11.5506	7.33163e-31	4.29153e-29
1506	ENSG00000197587	DMBX1	127343	8.53486	-4.60583	0.506918	-8.3195	8.83324e-17	1.28787e-15
1507	ENSG00000197696	NMB	4828	205.879	-2.14827	0.190016	-11.3041	1.25256e-29	6.54814e-28
1508	ENSG00000197757	HOXC6	3223	23.0399	-4.45265	0.472473	-9.27395	1.79369e-20	3.8745e-19
1509	ENSG00000197891	SLC22A12	116085	376.96	-4.67302	0.475923	-8.78585	1.55191e-18	2.73507e-17
1510	ENSG00000197901	SLC22A6	9356	2.99662	-3.08448	0.594859	-4.83218	1.35044e-06	5.42149e-06
1511	ENSG00000197993	KEL	3792	45.0932	-2.35015	0.312471	-2.49796	0.0124909	0.0244867
1512	ENSG00000198028	ZNF560	147741	7.09546	-4.39577	0.656412	-5.93352	2.96507e-09	1.73246e-08
1513	ENSG00000198033	TUBA3C	7278	61.1096	-5.99013	0.643668	-8.07617	6.68348e-16	8.82872e-15
1514	ENSG00000198054	DSCR8	84677	60.3673	-6.68097	0.601866	-11.668	1.85767e-31	1.16123e-29
1515	ENSG00000198074	AKR1B10	57016	25681.6	-3.47491	0.356939	-9.74932	1.85703e-22	4.84348e-21
1516	ENSG00000198099	ADH4	127	43083.6	2.32171	0.309622	7.49488	6.63591e-14	6.95048e-13
1517	ENSG00000198183	BPIFA1	51297	3.35044	-6.087	0.721808	-4.16379	3.1301e-05	0.000101382
1518	ENSG00000198203	SULT1C2	6819	762.17	-3.47337	0.30916	-11.2409	2.56815e-29	1.30997e-27
1519	ENSG00000198216	CACNA1E	777	23.4038	-2.96881	0.382608	-9.16565	4.92505e-20	1.01474e-18
1520	ENSG00000198353	HOXC4	3221	16.7095	-2.04163	0.297021	-6.18042	6.39298e-10	4.0989e-09
1521	ENSG00000198417	MT1F	4494	3077.79	2.81288	0.35348	7.94962	1.87085e-15	2.35463e-14
1522	ENSG00000198569	SLC34A3	142680	6.66533	-3.05199	0.370524	-8.12808	4.36151e-16	5.8789e-15
1523	ENSG00000198626	RYR2	6262	62.3636	-2.09534	0.331274	-5.48425	4.15234e-08	2.0771e-07
1524	ENSG00000198633	ZNF534	147658	4.2438	-2.52447	0.43284	-4.80362	1.5582e-06	6.20533e-06
1525	ENSG00000198670	LPA	4018	1766.82	2.30276	0.25016	9.20329	3.47147e-20	7.25715e-19
1526	ENSG00000198681	MAGEA1	4100	367.045	-8.26626	0.514481	-15.7566	6.19041e-56	1.70027e-53
1527	ENSG00000198723	TEX45	374877	11.3082	-2.05815	0.281661	-7.28348	3.25325e-13	3.15226e-12
1528	ENSG00000198729	PPP1R14C	81706	9.71894	-3.98037	0.400518	-5.45464	4.90719e-08	2.42985e-07
1529	ENSG00000198758	EPS8L3	79574	769.555	-4.77896	0.314211	-15.2137	2.87056e-52	6.97254e-50
1530	ENSG00000198759	EGFL6	25975	15.3863	-3.99833	0.354303	-11.0883	1.42988e-28	6.69137e-27
1531	ENSG00000198826	ARHGAP11A	9824	343.657	-2.51207	0.16626	-15.1068	1.4602e-51	3.38557e-49
1532	ENSG00000198883	PNMA5	114824	31.4498	-6.18134	0.481512	-8.51158	1.71578e-17	2.7048e-16
1533	ENSG00000198901	PRC1	9055	763.321	-3.1793	0.167713	-18.9545	4.05637e-80	4.52614e-77
1534	ENSG00000198915	RASGEF1A	221002	87.7647	-2.05563	0.314938	-6.52695	6.71238e-11	4.86842e-10
1535	ENSG00000198930	CSAG1	158511	190.919	-4.099	0.517821	-9.90268	4.05266e-23	1.12786e-21
1536	ENSG00000199085	MIR148A	406940	3.10816	-2.79744	0.342971	-8.12997	4.29414e-16	5.79027e-15
1537	ENSG00000199753	SNORD104	692227	97.4701	-2.72301	0.210876	-12.9036	4.29746e-38	4.34688e-36
1538	ENSG00000201558	RNVU1-6	101954276	5.03248	-2.27414	0.29915	-7.52984	5.08008e-14	5.40492e-13
1539	ENSG00000202337	RNU6-8	101954278	16.2893	-2.01093	0.236381	-8.48905	2.08334e-17	3.24838e-16
1540	ENSG00000203645	LINC00501	100820709	4.1447	-2.90649	0.465773	-6.23073	4.64259e-10	3.02884e-09
1541	ENSG00000203684	IBA57-DT	574432	4.38367	-2.20849	0.280633	-7.79124	6.63567e-15	7.86369e-14
1542	ENSG00000203697	CAPN8	388743	52.2244	-2.75245	0.262048	-7.55322	4.24623e-14	4.56648e-13
1543	ENSG00000203710	CR1	1378	57.4637	2.02319	0.252655	8.00665	1.17876e-15	1.51725e-14
1544	ENSG00000203729	LINC00272	388719	1.83519	-2.19591	0.590596	-3.7194	0.000199698	0.000564293
1545	ENSG00000203730	TEDDM1	127670	2.87104	-3.25239	0.510009	-5.95569	2.58969e-09	1.52511e-08
1546	ENSG00000203740	METTL11B	149281	1.87131	-2.6879	0.569692	-4.71754	2.3871e-06	9.26052e-06
1547	ENSG00000203760	CENPW	387103	261.17	-2.55937	0.17188	-14.8872	3.99241e-50	8.1927e-48
1548	ENSG00000203799	CCDC162P	221262	112.302	-2.37141	0.331664	-7.15122	8.60078e-13	7.92924e-12
1549	ENSG00000203877	RIPPLY2	134701	5.08265	-3.38134	0.67594	-4.70648	2.5203e-06	9.74445e-06
1550	ENSG00000203930	LINC00632	286411	5.54719	-2.93527	0.541479	-4.59955	4.23397e-06	1.58086e-05
1551	ENSG00000203985	LDLRAD1	388633	136.116	-3.9773	0.36105	-11.0081	3.49335e-28	1.58091e-26
1552	ENSG00000203989	RHOXF2B	727940	2.45611	-3.45835	0.837167	-3.0162	0.0025596	0.00583982
1553	ENSG00000204019	CT83	203413	5.50789	-3.55407	0.774815	-4.39354	1.11519e-05	3.88629e-05
1554	ENSG00000204044	SLC12A5-AS1	109729184	16.6275	-2.49859	0.29726	-7.87611	3.37718e-15	4.13815e-14
1555	ENSG00000204091	TDRG1	732253	1.28692	-3.1574	0.597731	-3.79756	0.000146128	0.000423407
1556	ENSG00000204118	NAP1L6P	645996	12.3614	-3.02777	0.502012	-6.00558	1.9065e-09	1.14621e-08
1557	ENSG00000204291	COL15A1	1306	1028.31	-3.7526	0.194791	-19.2627	1.1055e-82	1.64471e-79
1558	ENSG00000204335	SP5	389058	446.16	-2.40502	0.269382	-8.92942	4.28249e-19	8.0649e-18
1559	ENSG00000204410	MSH5	4439	91.4535	-2.19345	0.177167	-12.3749	3.57347e-35	2.9332e-33
1560	ENSG00000204460	LINC01854	151121	1.46638	-2.06494	0.749037	-2.7554	0.00586199	0.0123822
1561	ENSG00000204501	PRAMEF15	653619	13.5689	-3.68313	0.559828	-4.56091	5.09315e-06	1.87538e-05
1562	ENSG00000204505	PRAMEF9	343070	1.65018	-2.69779	0.676484	-3.50461	0.000457274	0.00120604
1563	ENSG00000204510	PRAMEF7	441871	3.76385	-3.38401	0.540854	-4.85933	1.17781e-06	4.76976e-06
1564	ENSG00000204511	MCCD1	401250	45.232	-5.7316	0.52283	-8.92523	4.4479e-19	8.3456e-18
1565	ENSG00000204603	LINC01257	116437	2.22976	-2.76379	0.647068	-4.07777	4.54701e-05	0.000143373
1566	ENSG00000204616	TRIM31	11074	463.442	-2.26091	0.288784	-7.83094	4.84237e-15	5.81965e-14
1567	ENSG00000204624	DISP3	57540	7.93473	-2.2672	0.348994	-5.6149	1.96671e-08	1.02937e-07
1568	ENSG00000204669	C9orf57	138240	8.25467	-3.70498	0.447215	-6.51464	7.28624e-11	5.26006e-10
1569	ENSG00000204688	OR2H1	26716	1.34475	-2.11088	0.65101	-3.24172	0.00118811	0.00289403
1570	ENSG00000204832	ST8SIA6-AS1	100128098	170.395	-5.4515	0.380294	-14.277	3.04608e-46	5.13035e-44
1571	ENSG00000204866	IGFL2	147920	2.51593	-2.91514	0.434622	-5.01777	5.22759e-07	2.23113e-06
1572	ENSG00000204936	CD177	57126	13.0305	-2.43538	0.321692	-3.97519	7.03245e-05	0.000215076
1573	ENSG00000204956	PCDHGA1	56114	31.7439	-2.31706	0.271794	-8.51307	1.69381e-17	2.67134e-16
1574	ENSG00000204969	PCDHA2	56146	2.6601	-2.61496	0.501246	-4.66334	3.11117e-06	1.18633e-05
1575	ENSG00000204970	PCDHA1	56147	17.821	-4.60108	0.45823	-8.16182	3.30002e-16	4.51112e-15
1576	ENSG00000204978	ERICH4	100170765	2.89595	-3.68995	0.471946	-6.27801	3.42941e-10	2.279e-09
1577	ENSG00000204983	PRSS1	5644	10.8727	-7.32622	0.661926	-5.82208	5.81187e-09	3.26236e-08
1578	ENSG00000205054	LINC01121	400952	8.198	-4.08778	0.423649	-9.5777	9.9232e-22	2.43517e-20
1579	ENSG00000205057	CLLU1OS	574016	2.09543	-3.56626	0.556162	-2.56601	0.0102875	0.0205773
1580	ENSG00000205116	TMEM88B	643965	3.25427	-3.29577	0.483206	-6.82054	9.0696e-12	7.37507e-11
1581	ENSG00000205212	CCDC144NL	339184	3.1531	-3.43364	0.630605	-4.58813	4.4724e-06	1.66189e-05
1582	ENSG00000205277	MUC12	10071	19.6667	-2.42362	0.292212	-2.64985	0.00805265	0.0164933
1583	ENSG00000205358	MT1H	4496	2103.38	2.75902	0.444322	6.19335	5.89003e-10	3.7962e-09
1584	ENSG00000205359	SLCO6A1	133482	11.6514	-4.80198	0.626096	-7.67056	1.71246e-14	1.93252e-13
1585	ENSG00000205364	MT1M	4499	2158.35	2.14397	0.411494	5.2025	1.96621e-07	8.95477e-07
1586	ENSG00000205426	KRT81	3887	15.7175	-2.12059	0.320833	-3.94105	8.11272e-05	0.000245756
1587	ENSG00000205628	LINC01446	401337	25.0769	-4.27604	0.508229	-8.32737	8.26549e-17	1.21053e-15
1588	ENSG00000205634	LINC00898	400932	2.16373	-2.75116	0.578939	-4.75153	2.01881e-06	7.90825e-06
1589	ENSG00000205642	VCX3B	425054	2.58326	-2.24366	0.523979	-3.93581	8.2915e-05	0.000250534
1590	ENSG00000205678	TECRL	253017	4.22204	-3.75437	0.704838	-4.46317	8.07578e-06	2.88037e-05
1591	ENSG00000205704	LINC00634	339674	4.82546	-3.49354	0.37903	-9.19065	3.90487e-20	8.12039e-19
1592	ENSG00000205755	CRLF2	64109	13.9626	-3.31708	0.404625	-6.23267	4.58543e-10	2.99483e-09
1593	ENSG00000205777	GAGE1	2543	5.49016	-4.68162	0.762657	-4.55175	5.32017e-06	1.95293e-05
1594	ENSG00000205869	KRTAP5-1	387264	5.25556	-2.29448	0.342451	-6.64195	3.09557e-11	2.34324e-10
1595	ENSG00000205899	BHLHA9	727857	2.20955	2.35	0.54951	4.25782	2.06427e-05	6.89041e-05
1596	ENSG00000205922	ONECUT3	390874	4.2742	-3.50915	0.42971	-5.54021	3.02104e-08	1.54033e-07
1597	ENSG00000205929	C21orf62	56245	5.7597	2.75219	0.250768	10.9779	4.88117e-28	2.16506e-26
1598	ENSG00000206013	IFITM5	387733	4.03158	-2.37827	0.482742	-4.65166	3.29271e-06	1.25114e-05
1599	ENSG00000206072	SERPINB11	89778	1.36956	-2.30036	0.689103	-2.93066	0.00338247	0.00752957
1600	ENSG00000206073	SERPINB4	6318	2.34639	-3.94288	0.754291	-2.36195	0.018179	0.0343657
1601	ENSG00000206129	LOC642484	642484	13.3063	-2.99813	0.46922	-6.35492	2.08529e-10	1.42393e-09
1602	ENSG00000206195	DUXAP8	503637	67.8646	-3.06315	0.26261	-11.6475	2.36392e-31	1.45277e-29
1603	ENSG00000206384	COL6A6	131873	20.686	3.29585	0.261886	12.5825	2.63546e-36	2.32451e-34
1604	ENSG00000206557	TRIM71	131405	350.086	-7.90265	0.477305	-16.1938	5.5811e-59	1.77248e-56
1605	ENSG00000206630	SNORD60	26788	4.95886	-2.13713	0.287595	-7.36615	1.75628e-13	1.75657e-12
1606	ENSG00000207704	MIR548AA1	100500863	1.43208	-2.09549	0.387565	-5.40684	6.41477e-08	3.13289e-07
1607	ENSG00000207805	MIR483	619552	2.29688	-2.70926	0.712731	-3.52175	0.000428702	0.00113589
1608	ENSG00000207973	MIR589	693174	1.5314	-2.00398	0.341707	-5.86311	4.54268e-09	2.58983e-08
1609	ENSG00000211448	DIO2	1734	128.374	-4.1761	0.382743	-10.2892	7.88604e-25	2.52991e-23
1610	ENSG00000213023	SYT3	84258	43.2558	-4.57454	0.398544	-8.43399	3.34078e-17	5.09334e-16
1611	ENSG00000213185	FAM24B	196792	20.8957	-2.1026	0.214677	-8.69113	3.58851e-18	6.07545e-17
1612	ENSG00000213347	MXD3	83463	430.893	-2.64288	0.140519	-18.8052	6.84369e-79	6.98174e-76
1613	ENSG00000213398	LCAT	3931	3646.66	2.53441	0.217487	11.6517	2.2482e-31	1.38883e-29
1614	ENSG00000213401	MAGEA12	4111	215.987	-6.4378	0.631446	-10.4832	1.03182e-25	3.65496e-24
1615	ENSG00000213420	GPC2	221914	16.0621	-2.07221	0.234208	-8.82551	1.08965e-18	1.95218e-17
1616	ENSG00000213468	FIRRE	286467	11.3081	-3.15624	0.337956	-9.24135	2.43414e-20	5.1765e-19
1617	ENSG00000213759	UGT2B11	10720	1311.77	-3.08357	0.29651	-10.4045	2.36504e-25	8.07323e-24
1618	ENSG00000213886	UBD	10537	3321.01	-2.52869	0.232976	-10.8555	1.87877e-27	7.91078e-26
1619	ENSG00000213931	HBE1	3046	6.21375	-2.77507	0.533289	-3.56429	0.000364845	0.000980221
1620	ENSG00000213973	ZNF99	7652	27.3662	-4.11487	0.417873	-9.74775	1.88611e-22	4.91572e-21
1621	ENSG00000214107	MAGEB1	4112	10.55	-4.93838	0.748648	-5.83984	5.22509e-09	2.95575e-08
1622	ENSG00000214145	LINC00887	100131551	13.7928	-2.07139	0.300565	-4.90405	9.38805e-07	3.85431e-06
1623	ENSG00000214290	COLCA2	120376	119.403	-2.70835	0.230769	-11.73	8.94579e-32	5.66345e-30
1624	ENSG00000214381	LINC00488	677779	14.3732	-3.3303	0.478674	-6.62218	3.53951e-11	2.65787e-10
1625	ENSG00000214402	LCNL1	401562	14.0589	-3.17616	0.39652	-4.96355	6.92156e-07	2.89902e-06
1626	ENSG00000214617	SLC6A10P	386757	1.29366	-2.84545	0.75418	-2.59416	0.00948229	0.0191415
1627	ENSG00000214725	CDIPTOSP	440356	7.27983	-2.40231	0.31848	-7.48984	6.89576e-14	7.20785e-13
1628	ENSG00000214803	LOC101927588	101927588	1.72256	-4.71608	0.375577	-4.13661	3.52479e-05	0.000113292
1629	ENSG00000214814	FER1L6	654463	69.2641	-5.61787	0.495676	-10.3248	5.44588e-25	1.77257e-23
1630	ENSG00000214822	KRT16P3	644945	1.56237	2.80977	0.653856	4.25329	2.10649e-05	7.02086e-05
1631	ENSG00000214929	SPATA31D1	389763	3.00672	-2.97694	0.824437	-3.3307	0.000866267	0.00217166
1632	ENSG00000215146	LOC441666	441666	38.6442	-2.33308	0.304238	-7.6609	1.8463e-14	2.07635e-13
1633	ENSG00000215182	MUC5AC	4586	11.3193	-4.95907	0.547184	-2.26177	0.0237116	0.0435562
1634	ENSG00000215262	KCNU1	157855	127.124	-6.37309	0.604337	-10.3899	2.75735e-25	9.34984e-24
1635	ENSG00000215512	LOC644669	644669	3.94509	-3.59974	0.665937	-5.27348	1.33861e-07	6.24219e-07
1636	ENSG00000215784	FAM72D	728833	17.0106	-3.55663	0.275562	-12.7638	2.61284e-37	2.48784e-35
1637	ENSG00000215808	LINC01139	339535	37.038	-3.47234	0.482699	-6.60295	4.03044e-11	3.00503e-10
1638	ENSG00000215811	BTNL10	100129094	3.82127	-2.07747	0.323737	-6.35762	2.04898e-10	1.40101e-09
1639	ENSG00000215834	FMO9P	116123	1.66271	-2.85094	0.654311	-3.60347	0.000313999	0.000855133
1640	ENSG00000215869	LOC100129138	100129138	6.23513	-2.55571	0.395351	-6.40474	1.50628e-10	1.04372e-09
1641	ENSG00000216863	LY86-AS1	285780	5.24076	-2.00468	0.418205	-2.75665	0.00583967	0.0123401
1642	ENSG00000219073	CELA3B	23436	1.35556	-3.56406	0.511681	-3.73659	0.000186533	0.000529903
1643	ENSG00000219926	LOC102723968	102723968	1.54222	-2.14424	0.532955	-4.02303	5.74554e-05	0.000178206
1644	ENSG00000221818	EBF2	64641	48.2596	-5.06916	0.266416	-18.7232	3.20149e-78	3.17534e-75
1645	ENSG00000221867	MAGEA3	4102	400.871	-6.13745	0.591539	-10.6358	2.02993e-26	7.72715e-25
1646	ENSG00000221926	TRIM16	10626	765.345	-2.92289	0.242461	-12.0562	1.79808e-33	1.28082e-31
1647	ENSG00000221986	MYBPHL	343263	12.6954	-5.29172	0.468947	-9.04512	1.49504e-19	2.93629e-18
1648	ENSG00000222030	LINC01793	101927285	6.22412	-3.49873	0.709593	-4.8624	1.15973e-06	4.70246e-06
1649	ENSG00000223392	CLDN10-AS1	100874194	1.39116	-2.95951	0.738435	-2.73449	0.00624779	0.0131102
1650	ENSG00000223485	LINC01615	101929484	4.251	-2.85712	0.344623	-6.5099	7.52022e-11	5.41474e-10
1651	ENSG00000223561	LOC646588	646588	11.9255	-3.54119	0.413268	-6.11144	9.87391e-10	6.18414e-09
1652	ENSG00000223572	CKMT1A	548596	16.3728	-3.28985	0.46328	-7.05859	1.68202e-12	1.49213e-11
1653	ENSG00000223614	ZNF735	730291	3.42495	-3.56537	0.794267	-3.65004	0.000262198	0.000723216
1654	ENSG00000223760	MED15P9	285103	1.91356	-2.74571	0.698812	-3.5285	0.000417918	0.00111003
1655	ENSG00000223802	GDF1	2657	37.2038	-4.23512	0.40286	-10.4293	1.8227e-25	6.30022e-24
1656	ENSG00000223806	LINC00114	400866	5.15172	-2.87856	0.43863	-6.47673	9.37341e-11	6.6684e-10
1657	ENSG00000223829	LOC105375267	105375267	6.14315	-4.12641	0.727968	-5.32428	1.01352e-07	4.80723e-07
1658	ENSG00000223855	HRAT92	441307	44.4183	-2.944	0.27749	-10.5877	3.39929e-26	1.26696e-24
1659	ENSG00000223941	LINC01014	100874330	3.22017	-2.21187	0.632205	-2.6912	0.00711951	0.0147472
1660	ENSG00000223949	ROR1-AS1	101927034	1.29958	-2.04028	0.482007	-2.66969	0.00759208	0.0156388
1661	ENSG00000224034	LINC02561	110806285	10.5215	-3.36383	0.335453	-9.88699	4.74047e-23	1.30907e-21
1662	ENSG00000224057	EGFR-AS1	100507500	100.279	-2.37087	0.395719	-5.99656	2.01545e-09	1.20765e-08
1663	ENSG00000224141	MIR548XHG	101927797	13.663	-4.98973	0.663493	-7.52279	5.36184e-14	5.681e-13
1664	ENSG00000224189	HAGLR	401022	266.33	-6.03412	0.342168	-17.5361	7.59199e-69	4.23562e-66
1665	ENSG00000224271	LOC284930	284930	6.94187	-4.40247	0.527858	-8.33949	7.46135e-17	1.09782e-15
1666	ENSG00000224294	PINCR	101927501	1.21307	-3.28034	0.69883	-2.80735	0.00499512	0.0107121
1667	ENSG00000224459	SLC25A34-AS1	110806303	3.00774	-2.51761	0.371471	-6.75257	1.45251e-11	1.14818e-10
1668	ENSG00000224517	HTR2A-AS1	100874082	1.83505	2.31053	0.276181	8.37979	5.30224e-17	7.92805e-16
1669	ENSG00000224577	LINC01117	102724224	2.60372	-2.67455	0.416847	-6.41424	1.41523e-10	9.84072e-10
1670	ENSG00000224805	LINC00853	100874253	61.7721	-2.3638	0.213525	-11.0612	1.93543e-28	8.96325e-27
1671	ENSG00000224893	LINC02840	105378065	1.90879	-2.15241	0.733917	-2.93396	0.00334673	0.00745838
1672	ENSG00000224960	PPP4R3C	139420	62.9015	-6.46001	0.665307	-10.8853	1.35403e-27	5.76245e-26
1673	ENSG00000225110	PNMA6F	105373377	1.48701	-3.92029	0.648779	-3.39727	0.000680609	0.0017382
1674	ENSG00000225140	LOC101930421	101930421	0.932196	2.01279	0.35179	5.73621	9.6818e-09	5.28348e-08
1675	ENSG00000225180	PVALEF	388428	2.17959	-2.95895	0.615977	-3.77501	0.000160002	0.000460506
1676	ENSG00000225206	MIR137HG	400765	1.18149	-2.27033	0.665925	-2.90808	0.0036365	0.00803994
1677	ENSG00000225210	DUXAP9	503638	13.0804	-3.69238	0.323918	-11.2188	3.29661e-29	1.65554e-27
1678	ENSG00000225255	PSLNR	106146148	2.59328	-3.28774	0.578365	-5.34432	9.07549e-08	4.34092e-07
1679	ENSG00000225329	LHFPL3-AS2	723809	30.476	-2.27103	0.415384	-4.35492	1.33113e-05	4.58158e-05
1680	ENSG00000225366	TDGF1P3	6998	2.93898	-3.03916	0.548702	-5.21003	1.8881e-07	8.62079e-07
1681	ENSG00000225383	SFTA1P	207107	12.5447	-5.23085	0.348682	-15.0021	7.11215e-51	1.54845e-48
1682	ENSG00000225420	LOC101928371	101928371	3.53164	-2.51871	0.496785	-5.03889	4.6823e-07	2.01599e-06
1683	ENSG00000225542	ZNF385D-AS1	100874216	4.25156	-3.62594	0.677991	-5.346	8.992e-08	4.30386e-07
1684	ENSG00000225546	LINC02476	105375475	41.2791	-6.6498	0.544361	-12.2149	2.58797e-34	1.96192e-32
1685	ENSG00000225548	LINC01980	105377007	66.1544	-6.48811	0.569444	-11.4019	4.08958e-30	2.22935e-28
1686	ENSG00000225611	LINC02158	729083	44.7353	-3.29997	0.38149	-3.08594	0.00202908	0.00472236
1687	ENSG00000225676	LOC105372988	105372988	1.38495	-2.31395	0.464825	-4.97847	6.40898e-07	2.69889e-06
1688	ENSG00000225697	SLC26A6	65010	1010.15	-2.61908	0.137496	-19.0474	6.90503e-81	8.21837e-78
1689	ENSG00000225792	LOC105375304	105375304	32.8136	2.31591	0.3335	6.94034	3.91151e-12	3.32455e-11
1690	ENSG00000226025	LGALS17A	400696	7.6108	-2.22192	0.394445	-4.23088	2.32779e-05	7.70591e-05
1691	ENSG00000226174	TEX22	647310	19.4287	-2.13508	0.209636	-10.1637	2.87958e-24	8.7505e-23
1692	ENSG00000226372	DCAF8L1	139425	13.5228	-5.44849	0.707082	-6.81992	9.10897e-12	7.40202e-11
1693	ENSG00000226416	MRPL23-AS1	100133545	12.8676	-2.492	0.431832	-4.55926	5.13342e-06	1.88885e-05
1694	ENSG00000226476	LINC01748	105378763	14.4718	-4.72273	0.528872	-8.88702	6.27719e-19	1.15592e-17
1695	ENSG00000226510	UPK1A-AS1	100862728	10.7066	-3.25171	0.448592	-7.17863	7.04112e-13	6.55738e-12
1696	ENSG00000226644	LOC388780	388780	56.6131	-2.2853	0.216277	-10.558	4.66468e-26	1.71003e-24
1697	ENSG00000226673	LINC01108	102216342	14.8958	-2.86046	0.345608	-8.23229	1.83665e-16	2.58187e-15
1698	ENSG00000226674	TEX41	401014	93.165	-3.17699	0.306892	-10.344	4.45473e-25	1.47415e-23
1699	ENSG00000226686	LINC01535	101927667	15.2482	-3.39104	0.347232	-9.66649	4.18474e-22	1.05747e-20
1700	ENSG00000226690	LOC102725191	102725191	1.44543	-2.15367	0.494733	-4.35289	1.34356e-05	4.62169e-05
1701	ENSG00000226869	LHFPL3-AS1	645591	1.43373	-2.21651	0.590061	-3.45856	0.000543062	0.00141238
1702	ENSG00000226887	ERVMER34-1	100288413	33.9353	-2.90151	0.378942	-5.97168	2.34818e-09	1.39391e-08
1703	ENSG00000227036	LINC00511	400619	183.986	-3.25296	0.302324	-10.7581	5.43016e-27	2.19084e-25
1704	ENSG00000227053	MUC12-AS1	102724094	3.87133	-2.98684	0.328312	-3.62648	0.000287313	0.000787019
1705	ENSG00000227115	LINC01630	100287225	7.74068	-4.49545	0.582625	-7.15593	8.3107e-13	7.66973e-12
1706	ENSG00000227131	LOC105375050	105375050	1.83447	-3.25291	0.636396	-4.19179	2.76767e-05	9.03891e-05
1707	ENSG00000227145	IL21-AS1	100996941	6.00119	-2.61283	0.521832	-4.76233	1.91375e-06	7.51565e-06
1708	ENSG00000227195	MIR663AHG	284801	9.32917	-4.97561	0.642609	-6.96536	3.27572e-12	2.80621e-11
1709	ENSG00000227471	AKR1B15	441282	271.336	-3.67643	0.397101	-9.27188	1.8289e-20	3.94578e-19
1710	ENSG00000227517	LINC01483	101928122	2.1936	-2.40283	0.493895	-4.86554	1.14145e-06	4.62986e-06
1711	ENSG00000227640	SOX21-AS1	100507533	2.81618	-3.41741	0.49317	-4.72381	2.31469e-06	8.99427e-06
1712	ENSG00000227674	LINC00355	144766	20.3293	-5.89607	0.516544	-11.4132	3.59211e-30	1.9702e-28
1713	ENSG00000227729	RD3L	647286	2.00762	3.80141	0.606198	6.19469	5.84003e-10	3.76669e-09
1714	ENSG00000227733	LOC101927468	101927468	32.4447	-3.6409	0.335138	-9.46362	2.97449e-21	6.98272e-20
1715	ENSG00000227811	INKA2-AS1	100506343	3.03078	-2.13246	0.338665	-6.2423	4.31195e-10	2.82656e-09
1716	ENSG00000227857	LOC101929626	101929626	3.94908	-2.74792	0.349045	-7.80659	5.87538e-15	7.00689e-14
1717	ENSG00000227877	MRLN	100507027	1.68035	-3.5271	0.557653	-4.23614	2.27391e-05	7.54224e-05
1718	ENSG00000227908	FLJ31104	441072	17.2803	-2.06835	0.222944	-9.2558	2.12635e-20	4.54087e-19
1719	ENSG00000227947	LINC01738	107984953	1.07906	-2.72146	0.613882	-2.23064	0.0257048	0.0467964
1720	ENSG00000228022	HCG20	105375013	8.39965	-2.02005	0.310365	-6.4784	9.26995e-11	6.59611e-10
1721	ENSG00000228044	LOC101927787	101927787	5.22259	-2.23796	0.402329	-4.22413	2.39863e-05	7.91768e-05
1722	ENSG00000228109	MELTF-AS1	100507057	42.0763	-2.3272	0.215001	-10.8118	3.027e-27	1.2524e-25
1723	ENSG00000228127	LINC01649	101928995	0.895328	-2.3951	0.585007	-2.93242	0.00336331	0.00749066
1724	ENSG00000228203	RNF144A-AS1	386597	14.7928	-2.71919	0.318425	-7.19394	6.29495e-13	5.89786e-12
1725	ENSG00000228350	LINC02585	102724368	7.82689	-2.26869	0.250067	-9.01393	1.98799e-19	3.85988e-18
1726	ENSG00000228376	GAS2L1P2	340508	2.60387	-2.33233	0.457372	-5.09264	3.53113e-07	1.54911e-06
1727	ENSG00000228723	SRGAP3-AS2	101927416	1.1422	-2.76824	0.588599	-3.26679	0.00108776	0.00267471
1728	ENSG00000228727	SAPCD1	401251	19.3542	-2.77904	0.228296	-12.1183	8.45426e-34	6.13553e-32
1729	ENSG00000228842	PCDH9-AS2	100874064	7.46806	2.88858	0.580904	4.93161	8.15551e-07	3.38369e-06
1730	ENSG00000229205	LINC00200	399706	4.42405	-3.43929	0.6977	-3.94131	8.10388e-05	0.000245509
1731	ENSG00000229404	LINC00858	170425	3.19868	-2.98002	0.616775	-4.83296	1.34517e-06	5.40156e-06
1732	ENSG00000229544	NKX1-2	390010	3.41618	-4.4884	0.598941	-4.13167	3.60139e-05	0.000115588
1733	ENSG00000229558	SACS-AS1	100506680	4.30169	-4.98537	0.711466	-4.70492	2.53962e-06	9.81277e-06
1734	ENSG00000229637	PRAC2	360205	2.02685	-3.19239	0.677591	-3.78877	0.000151396	0.000437748
1735	ENSG00000229676	ZNF492	57615	9.65471	-2.71194	0.392014	-6.86695	6.55881e-12	5.41978e-11
1736	ENSG00000229876	CASC20	101929244	11.2433	-4.75976	0.606587	-7.83915	4.53592e-15	5.46607e-14
1737	ENSG00000230269	LINC02525	100507194	5.49565	-4.36628	0.61617	-6.2904	3.16649e-10	2.11135e-09
1738	ENSG00000230316	FEZF1-AS1	154860	48.7053	-5.33986	0.432235	-12.1263	7.66444e-34	5.58503e-32
1739	ENSG00000230417	LINC00595	414243	2.42261	-3.09505	0.475556	-5.16764	2.37066e-07	1.06474e-06
1740	ENSG00000230426	LINC01036	104169671	4.11524	-3.65815	0.668726	-4.93733	7.91998e-07	3.29095e-06
1741	ENSG00000230445	LRRC37A6P	387646	29.4244	-2.8654	0.267544	-10.677	1.30469e-26	5.06913e-25
1742	ENSG00000230524	COL6A4P1	344875	3.15695	-2.19429	0.395695	-5.49567	3.89229e-08	1.95359e-07
1743	ENSG00000230873	STMND1	401236	44.9998	-3.09433	0.338752	-9.11671	7.74379e-20	1.56391e-18
1744	ENSG00000230921	HAO2-IT1	100874270	6.47284	2.06686	0.350801	5.89158	3.82519e-09	2.20258e-08
1745	ENSG00000230978	LINC00160	54064	1.92654	-2.733	0.586331	-4.22263	2.41471e-05	7.96506e-05
1746	ENSG00000231013	LOC107105282	107105282	73.4006	-2.44314	0.303962	-8.03454	9.39326e-16	1.2214e-14
1747	ENSG00000231031	LINC01804	101926966	1.37236	-2.37661	0.771629	-2.57911	0.00990546	0.0199057
1748	ENSG00000231107	LINC01508	101927873	5.26509	-3.41612	0.644845	-3.86068	0.000113074	0.00033414
1749	ENSG00000231131	LNCAROD	101928687	1.92793	-2.88954	0.504456	-5.72832	1.01427e-08	5.51732e-08
1750	ENSG00000231172	LOC101927884	101927884	8.51006	-4.99677	0.438511	-6.63533	3.23775e-11	2.44464e-10
1751	ENSG00000231226	TRIM31-AS1	104533120	2.48886	-2.01389	0.380678	-5.25295	1.49684e-07	6.93386e-07
1752	ENSG00000231252	LOC101926964	101926964	4.2281	-3.12326	0.465115	-6.43169	1.26195e-10	8.82645e-10
1753	ENSG00000231274	SBK3	100130827	8.99611	-2.55871	0.361921	-6.04995	1.44892e-09	8.8633e-09
1754	ENSG00000231419	LINC00689	154822	19.0628	-3.24255	0.468884	-6.63018	3.35275e-11	2.5272e-10
1755	ENSG00000231431	LOC440910	440910	7.19977	-3.69139	0.630184	-5.07439	3.88737e-07	1.69685e-06
1756	ENSG00000231439	WASIR2	100132169	2.30446	-2.15845	0.4112	-5.23756	1.62715e-07	7.4976e-07
1757	ENSG00000231532	LINC01249	727982	2.63823	-2.82117	0.743683	-3.36995	0.000751806	0.00190518
1758	ENSG00000231666	LINC01704	646268	3.41065	-3.41122	0.332462	-10.2609	1.05713e-24	3.35519e-23
1759	ENSG00000231776	LINC01611	105377880	9.93805	-4.87872	0.574982	-8.48364	2.18254e-17	3.38091e-16
1760	ENSG00000231918	LOC730100	730100	1.11803	-3.12711	0.741421	-2.50705	0.0121745	0.0239294
1761	ENSG00000232021	LEF1-AS1	641518	6.42378	-3.77845	0.372883	-10.083	6.56832e-24	1.93028e-22
1762	ENSG00000232023	LINC01807	101928765	7.72887	-2.08279	0.460733	-4.50827	6.53585e-06	2.36635e-05
1763	ENSG00000232079	LINC01697	284825	12.9031	-4.43923	0.571293	-6.56729	5.12393e-11	3.77694e-10
1764	ENSG00000232131	NCOA7-AS1	104355145	3.66959	2.16295	0.356339	6.07004	1.27876e-09	7.88454e-09
1765	ENSG00000232233	LINC02043	102724699	2.52961	-2.36785	0.329243	-5.88437	3.99562e-09	2.29332e-08
1766	ENSG00000232237	ASCL5	647219	2.61906	-2.24107	0.375042	-5.08168	3.7412e-07	1.63645e-06
1767	ENSG00000232265	LINC02805	100505824	3.94515	-2.02827	0.41075	-4.90925	9.1426e-07	3.76176e-06
1768	ENSG00000232416	BPESC1	60467	1.57932	-2.57192	0.466832	-5.50919	3.60488e-08	1.81725e-07
1769	ENSG00000232527	LINC02802	100996732	10.2005	-2.37867	0.301692	-7.84178	4.44187e-15	5.35997e-14
1770	ENSG00000232586	KIAA1614-AS1	103344928	3.73056	-2.21202	0.309019	-7.08995	1.34156e-12	1.2075e-11
1771	ENSG00000232677	LINC00665	100506930	371.201	-2.74207	0.258127	-10.6233	2.32157e-26	8.78113e-25
1772	ENSG00000232765	LOC100421746	100421746	6.15181	-4.83537	0.6025	-6.97532	3.05179e-12	2.62319e-11
1773	ENSG00000232775	BMS1P22	106480334	1.30501	-2.29721	0.409958	-5.60357	2.09985e-08	1.09328e-07
1774	ENSG00000232850	PTGES2-AS1	389791	8.10427	-3.49705	0.328473	-10.4883	9.78164e-26	3.4718e-24
1775	ENSG00000233154	LINC01762	101929023	8.46385	-2.4323	0.292953	-8.24853	1.60353e-16	2.27115e-15
1776	ENSG00000233198	RNF224	643596	4.69221	-2.74956	0.370393	-7.3504	1.97612e-13	1.9638e-12
1777	ENSG00000233217	MROH3P	647215	5.65528	-3.5306	0.476205	-5.96841	2.39583e-09	1.41989e-08
1778	ENSG00000233288	LOC101928401	101928401	3.2635	-2.74628	0.58612	-4.67398	2.95421e-06	1.12949e-05
1779	ENSG00000233296	TMEM18-DT	105373354	2.78785	-2.02833	0.333753	-4.36316	1.28195e-05	4.4234e-05
1780	ENSG00000233393	LOC105369306	105369306	3.92182	-2.38793	0.478862	-3.53241	0.000411798	0.00109475
1781	ENSG00000233515	LINC01518	101929397	3.65135	-3.22307	0.698193	-4.43227	9.32478e-06	3.29133e-05
1782	ENSG00000233532	LINC00460	728192	1.66435	-2.75531	0.623777	-2.92954	0.00339464	0.00755291
1783	ENSG00000233539	LOC730338	730338	44.1398	-4.36632	0.34455	-12.5602	3.49567e-36	3.07429e-34
1784	ENSG00000233610	LINC00462	100129597	1.07946	-2.20916	0.565963	-3.10716	0.00188896	0.00441901
1785	ENSG00000233718	MYCNOS	10408	5.82381	-2.74768	0.430761	-6.33302	2.40413e-10	1.62764e-09
1786	ENSG00000233791	LINC01136	730227	9.92246	-2.49136	0.29656	-8.34986	6.83424e-17	1.01161e-15
1787	ENSG00000233922	LINC01694	105372840	22.9909	-2.76045	0.383763	-6.81669	9.31624e-12	7.56013e-11
1788	ENSG00000233985	LINC01681	105371609	13.1936	-2.9712	0.478918	-6.17828	6.4804e-10	4.15197e-09
1789	ENSG00000234068	PAGE2	203569	56.4578	-5.37251	0.696082	-8.84722	8.97285e-19	1.62549e-17
1790	ENSG00000234264	DEPDC1-AS1	101927220	1.25541	-2.43244	0.411172	-5.47566	4.35891e-08	2.17434e-07
1791	ENSG00000234352	LOC349160	349160	1.97092	-2.33796	0.625049	-3.26982	0.00107617	0.00264861
1792	ENSG00000234380	LINC01426	100506385	112.521	-2.79212	0.276792	-10.0831	6.55917e-24	1.92917e-22
1793	ENSG00000234511	C5orf58	133874	42.8812	-3.0203	0.367099	-8.21381	2.14282e-16	2.99341e-15
1794	ENSG00000234602	MCIDAS	345643	4.09029	-3.22258	0.493195	-6.51686	7.17964e-11	5.1894e-10
1795	ENSG00000234722	LINC01287	103724390	381.894	-7.41518	0.587914	-12.7524	3.0228e-37	2.86292e-35
1796	ENSG00000234948	LINC01524	101927700	4.03801	-3.57777	0.489134	-7.31431	2.58716e-13	2.54062e-12
1797	ENSG00000234965	SHISA8	440829	2.57999	-2.57894	0.425786	-5.39239	6.95279e-08	3.37764e-07
1798	ENSG00000235029	MNX1-AS2	105375606	2.91949	-2.61323	0.612476	-4.25873	2.05596e-05	6.86652e-05
1799	ENSG00000235034	C19orf81	342918	14.7094	-4.44006	0.509956	-8.6167	6.89085e-18	1.12865e-16
1800	ENSG00000235098	ANKRD65	441869	330.584	-2.43328	0.273309	-8.90417	5.37872e-19	9.98194e-18
1801	ENSG00000235122	LOC101927020	101927020	3.45834	-2.7806	0.571964	-2.3283	0.0198961	0.0372449
1802	ENSG00000235162	C12orf75	387882	557.7	-2.12501	0.255802	-8.30831	9.70766e-17	1.40674e-15
1803	ENSG00000235180	LINC00601	101101772	1.59039	-3.45379	0.675244	-3.21471	0.00130575	0.00315553
1804	ENSG00000235385	LINC02154	109729169	2.81665	-2.97026	0.561072	-4.49953	6.8104e-06	2.45852e-05
1805	ENSG00000235621	LINC00494	284749	26.5849	-3.21533	0.447471	-6.15539	7.48946e-10	4.76258e-09
1806	ENSG00000235643	LINC01647	101929181	0.838471	-2.40513	0.518267	-2.90595	0.00366146	0.0080911
1807	ENSG00000235711	ANKRD34C	390616	0.974535	-2.13473	0.556034	-2.52459	0.0115832	0.0228832
1808	ENSG00000235770	LINC00607	646324	54.7776	-2.37084	0.279757	-8.46983	2.45757e-17	3.79438e-16
1809	ENSG00000235830	SRGAP3-AS4	101927440	1.34281	-2.17102	0.613593	-3.13068	0.001744	0.00411031
1810	ENSG00000235890	TSPEAR-AS1	54082	88.2852	-2.11507	0.270613	-7.81409	5.53608e-15	6.6266e-14
1811	ENSG00000236013	LOC100507477	100507477	2.76583	-2.73153	0.486793	-3.79762	0.000146092	0.000423337
1812	ENSG00000236049	LINC01920	101929260	0.659349	3.011	0.490908	6.13157	8.70167e-10	5.48846e-09
1813	ENSG00000236081	ELFN1-AS1	101927125	24.0617	-3.57798	0.425818	-6.61744	3.65485e-11	2.73872e-10
1814	ENSG00000236268	LINC01361	101927498	1.43636	-3.54413	0.431018	-2.33566	0.0195091	0.0366068
1815	ENSG00000236279	CLEC2L	154790	31.0584	-5.99771	0.558289	-9.59974	8.01427e-22	1.97896e-20
1816	ENSG00000236311	TLX1NB	100038246	2.08897	-2.69266	0.435881	-6.17752	6.5118e-10	4.17134e-09
1817	ENSG00000236366	LOC153910	153910	8.78197	-4.9729	0.514605	-8.97626	2.80118e-19	5.38316e-18
1818	ENSG00000236446	CT47B1	643311	1.46272	-3.39827	0.696618	-3.21898	0.00128649	0.00311343
1819	ENSG00000236499	LINC00896	150197	60.7582	-2.09888	0.267255	-7.85061	4.14032e-15	5.01473e-14
1820	ENSG00000236511	LINC01231	101929247	2.27138	-2.43472	0.88894	-2.49373	0.0126409	0.0247563
1821	ENSG00000236520	GPC6-AS1	100873972	1.37131	-2.47067	0.427813	-3.81122	0.00013828	0.000402431
1822	ENSG00000236651	DLX2-DT	104326193	1.61109	-2.45046	0.624604	-3.92344	8.7292e-05	0.000262908
1823	ENSG00000236719	OVAAL	148756	1.82232	-4.0385	0.544918	-4.5559	5.21605e-06	1.91748e-05
1824	ENSG00000236740	LOC101927189	101927189	6.52632	-2.05443	0.36219	-5.6384	1.71636e-08	9.05768e-08
1825	ENSG00000236824	BCYRN1	618	19.8159	-2.15764	0.244537	-5.96248	2.48443e-09	1.46699e-08
1826	ENSG00000236841	LOC101929532	101929532	3.60469	-2.01735	0.362746	-5.51377	3.51227e-08	1.77282e-07
1827	ENSG00000236849	LINC01474	101927258	35.9958	-2.18903	0.274158	-4.30286	1.68607e-05	5.70551e-05
1828	ENSG00000237125	HAND2-AS1	79804	63.7248	2.25041	0.346672	6.48687	8.76405e-11	6.26076e-10
1829	ENSG00000237223	SULT1C2P1	151234	5.76422	-2.77462	0.393419	-6.97763	3.00198e-12	2.58348e-11
1830	ENSG00000237265	LOC100129291	100129291	18.7025	-5.62562	0.702394	-24.2745	3.64299e-130	1.30077e-125
1831	ENSG00000237289	CKMT1B	1159	15.0633	-3.96	0.490935	-5.96077	2.51055e-09	1.48119e-08
1832	ENSG00000237412	PRSS56	646960	11.7007	-5.38797	0.631522	-6.58033	4.69417e-11	3.47594e-10
1833	ENSG00000237424	FOXD2-AS1	84793	158.761	-2.08383	0.186519	-11.17	5.7178e-29	2.816e-27
1834	ENSG00000237463	LRRC52-AS1	400794	1.84757	-2.28362	0.619796	-3.68393	0.000229662	0.000641049
1835	ENSG00000237596	LOC644135	644135	74.8038	-4.28776	0.370707	-11.0406	2.4353e-28	1.11196e-26
1836	ENSG00000237649	KIFC1	3833	633.309	-3.71213	0.188281	-19.7108	1.74222e-86	5.18398e-83
1837	ENSG00000237664	LINC00316	388830	1.46424	-2.55259	0.478848	-4.63971	3.48901e-06	1.31982e-05
1838	ENSG00000237686	LOC101929705	101929705	47.8482	-2.87971	0.327356	-10.7575	5.46299e-27	2.2016e-25
1839	ENSG00000238062	SPATA3-AS1	348761	5.59859	-2.69041	0.353874	-7.51069	5.88145e-14	6.19843e-13
1840	ENSG00000238098	ABCA17P	650655	12.3493	-2.13877	0.261932	-6.32439	2.54229e-10	1.71565e-09
1841	ENSG00000238120	LINC01589	100506737	5.84991	-3.22799	0.432443	-4.88482	1.03522e-06	4.22688e-06
1842	ENSG00000238269	PAGE2B	389860	29.5549	-5.58003	0.560572	-9.23505	2.58163e-20	5.46412e-19
1843	ENSG00000238284	LINC01448	101928795	4.78975	-3.55599	0.619531	-5.53917	3.03917e-08	1.54913e-07
1844	ENSG00000239523	MYLK-AS1	100506826	28.1208	-2.14874	0.17671	-12.1413	6.37812e-34	4.69561e-32
1845	ENSG00000239589	LINC00879	255025	6.00737	-3.92704	0.776906	-4.61309	3.96719e-06	1.48716e-05
1846	ENSG00000239620	PRR20G	100419008	0.802361	-3.47341	0.613877	-2.70991	0.00673021	0.0140253
1847	ENSG00000239810	PRAMEF11	440560	1.34293	-2.34442	0.590176	-3.47982	0.000501749	0.00131297
1848	ENSG00000240045	STRIT1	100507537	7.95804	-4.36397	0.59019	-5.40634	6.43239e-08	3.14064e-07
1849	ENSG00000240204	SMKR1	100287482	15.3265	-2.79692	0.335653	-8.28563	1.17487e-16	1.68406e-15
1850	ENSG00000240224	UGT1A5	54579	8.64956	-2.54129	0.391618	-4.272	1.93731e-05	6.49518e-05
1851	ENSG00000240280	TCAM1P	146771	21.6378	-4.52613	0.489081	-9.13425	6.58637e-20	1.33849e-18
1852	ENSG00000240405	SAMMSON	101927152	1.78528	-2.6578	0.545928	-4.86779	1.12855e-06	4.58118e-06
1853	ENSG00000240498	CDKN2B-AS1	100048912	33.9143	-3.56482	0.243213	-14.5733	4.15544e-48	7.72783e-46
1854	ENSG00000240935	PLGLA	285189	140.526	2.21587	0.293925	7.53627	4.83621e-14	5.15468e-13
1855	ENSG00000240990	HOXA11-AS	221883	8.91513	-5.00153	0.460881	-10.4005	2.46688e-25	8.41282e-24
1856	ENSG00000241104	LOC284344	284344	3.60972	-2.53686	0.522784	-4.78715	1.69163e-06	6.69414e-06
1857	ENSG00000241186	TDGF1	6997	389.02	-2.37929	0.309214	-7.69749	1.38769e-14	1.58326e-13
1858	ENSG00000241322	CDRT1	374286	18.7978	-3.05981	0.360369	-8.44636	3.00518e-17	4.60025e-16
1859	ENSG00000241369	LINC01192	647107	2.48466	-2.91998	0.54545	-5.35287	8.6571e-08	4.15248e-07
1860	ENSG00000241469	LINC00635	151658	1.75716	-2.67581	0.549544	-4.3772	1.20212e-05	4.1701e-05
1861	ENSG00000241644	INMT	11185	622.635	2.41308	0.247158	9.76141	1.64846e-22	4.33751e-21
1862	ENSG00000242173	ARHGDIG	398	3.33313	-2.81667	0.402849	-4.38615	1.15376e-05	4.01054e-05
1863	ENSG00000242265	PEG10	23089	8075.16	-4.33813	0.404228	-10.7656	5.00169e-27	2.02483e-25
1864	ENSG00000242268	LINC02082	100507661	3.55126	-3.3403	0.537175	-6.218	5.03529e-10	3.27308e-09
1865	ENSG00000242428	C3orf67-AS1	101929238	3.02958	-2.59422	0.407604	-6.34696	2.19612e-10	1.49447e-09
1866	ENSG00000242515	UGT1A10	54575	33.8769	-4.59747	0.522526	-7.55071	4.32884e-14	4.64719e-13
1867	ENSG00000242599	CSAG4	100130935	5.79656	-3.43754	0.695018	-4.97238	6.61343e-07	2.77713e-06
1868	ENSG00000242781	LINC02050	105377175	1.78434	-2.63871	0.594657	-4.43696	9.12376e-06	3.22699e-05
1869	ENSG00000242866	STRC	161497	6.44083	-5.72214	0.356611	-7.70349	1.32401e-14	1.51426e-13
1870	ENSG00000243040	RBMY2FP	159162	9.6808	-4.11704	0.821419	-4.91075	9.07272e-07	3.73559e-06
1871	ENSG00000243073	PRAMEF4	400735	28.6876	-4.70516	0.550441	-7.57833	3.50021e-14	3.79297e-13
1872	ENSG00000243316	GUCY2GP	390003	1.07869	-2.12932	0.451571	-2.47766	0.0132246	0.0257637
1873	ENSG00000243479	MNX1-AS1	645249	18.3439	-5.17817	0.680022	-8.78038	1.62925e-18	2.86713e-17
1874	ENSG00000243742	RPLP0P2	113157	25.2768	-3.04169	0.280767	-9.7682	1.54164e-22	4.07747e-21
1875	ENSG00000244020	MT1HL1	645745	1.22827	2.4948	0.528587	4.72096	2.34731e-06	9.11506e-06
1876	ENSG00000244122	UGT1A7	54577	13.508	-2.34234	0.318714	-3.31655	0.000911358	0.00227384
1877	ENSG00000244227	LRRC77P	646168	11.7717	-3.08486	0.313963	-9.26757	1.90436e-20	4.09621e-19
1878	ENSG00000244234	GMCL2	64396	4.07679	-2.80843	0.516895	-4.35162	1.35134e-05	4.64623e-05
1879	ENSG00000244306	DUXAP10	503639	14.2884	-3.91958	0.335892	-11.467	1.93144e-30	1.08605e-28
1880	ENSG00000244411	KRTAP5-7	440050	5.30436	-2.06937	0.422614	-4.86195	1.16235e-06	4.71194e-06
1881	ENSG00000244476	ERVFRD-1	405754	5.03718	2.04744	0.305061	6.71383	1.89579e-11	1.47475e-10
1882	ENSG00000244607	CCDC13	152206	41.4384	-2.58169	0.253659	-3.97238	7.11587e-05	0.000217385
1883	ENSG00000244734	HBB	3043	1134.02	2.04563	0.254082	8.04956	8.30925e-16	1.08479e-14
1884	ENSG00000245080	MIR3150BHG	105375650	1.73748	-2.09543	0.385145	-5.43555	5.46273e-08	2.69e-07
1885	ENSG00000245466	LOC101928075	101928075	1.39855	-2.42551	0.474526	-4.44454	8.808e-06	3.12343e-05
1886	ENSG00000245614	DDX11-AS1	100506660	19.4393	-2.79518	0.208649	-13.3355	1.43847e-40	1.73521e-38
1887	ENSG00000245694	CRNDE	643911	142.511	-3.27583	0.240461	-13.6117	3.41135e-42	4.54499e-40
1888	ENSG00000245719	LOC101929076	101929076	1.66913	-2.31815	0.439655	-5.27272	1.34415e-07	6.26392e-07
1889	ENSG00000245812	LINC02202	101927740	9.14933	-2.71426	0.241206	-10.5187	7.08082e-26	2.55124e-24
1890	ENSG00000245832	MIR4300HG	101928989	1.39907	-2.0481	0.617029	-3.31861	0.000904663	0.00225952
1891	ENSG00000246228	CASC8	727677	5.68904	-3.5016	0.430563	-6.47118	9.72435e-11	6.90843e-10
1892	ENSG00000246876	LINC02466	101927282	4.14192	-3.88899	0.522227	-7.44655	9.5814e-14	9.85634e-13
1893	ENSG00000247675	LRP4-AS1	100507401	3.61904	-2.12072	0.320393	-6.56755	5.11488e-11	3.77105e-10
1894	ENSG00000248050	LOC100132813	100132813	69.4213	2.13599	0.319089	6.69098	2.21674e-11	1.70805e-10
1895	ENSG00000248118	LINC01019	285577	18.6778	-5.07414	0.696795	-8.90611	5.28567e-19	9.83995e-18
1896	ENSG00000248265	FLJ12825	440101	6.88428	-2.8205	0.356957	-7.80684	5.86418e-15	6.99588e-14
1897	ENSG00000248307	LINC00616	641365	1.25891	-2.73237	0.682736	-2.95859	0.00309052	0.00693981
1898	ENSG00000248319	LINC02275	100506085	19.4889	2.05753	0.370561	5.54842	2.88256e-08	1.47372e-07
1899	ENSG00000248323	LUCAT1	100505994	66.9698	-3.92741	0.381938	-10.2583	1.08601e-24	3.43769e-23
1900	ENSG00000248329	APELA	100506013	2.08288	-3.47786	0.650004	-3.75392	0.000174087	0.000497515
1901	ENSG00000248461	LINC02119	101929745	12.724	-4.70001	0.650207	-6.0116	1.837e-09	1.10648e-08
1902	ENSG00000248498	ASNSP1	389652	37.2335	-5.67515	0.58761	-9.65084	4.87524e-22	1.22296e-20
1903	ENSG00000248540	LOC283731	283731	3.75787	-3.0027	0.426789	-7.00731	2.42949e-12	2.11424e-11
1904	ENSG00000248596	LOC643201	643201	68.3165	-2.04573	0.279758	-7.30957	2.67993e-13	2.62307e-12
1905	ENSG00000248698	LINC01085	152742	1.20311	-3.03428	0.510342	-3.70581	0.000210719	0.000592576
1906	ENSG00000248713	C4orf54	285556	8.04157	-2.0042	0.417084	-4.78816	1.68318e-06	6.66367e-06
1907	ENSG00000248771	SMIM31	100505989	46.3022	-3.22743	0.541976	-5.76145	8.33925e-09	4.58517e-08
1908	ENSG00000248837	LOC105374524	105374524	4.5697	-3.20647	0.609309	-5.04888	4.44405e-07	1.92175e-06
1909	ENSG00000249173	LINC01093	100506229	372.56	3.35055	0.341806	9.79237	1.21414e-22	3.24491e-21
1910	ENSG00000249196	TMEM132D-AS1	283352	8.40208	-5.98085	0.681148	-6.20695	5.4024e-10	3.49833e-09
1911	ENSG00000249378	LINC01060	401164	2.55505	-2.64312	0.560796	-4.54648	5.45505e-06	1.99895e-05
1912	ENSG00000249395	CASC9	101805492	138.272	-3.06805	0.46571	-6.60961	3.85341e-11	2.88043e-10
1913	ENSG00000249396	LINC02212	101929412	3.48921	-3.57845	0.706028	-3.40284	0.000666887	0.00170633
1914	ENSG00000249550	LINC01234	100506465	75.7584	-5.32307	0.487156	-10.8445	2.11793e-27	8.86553e-26
1915	ENSG00000249574	LOC442497	442497	2.41457	-2.17486	0.464936	-4.64142	3.4602e-06	1.31004e-05
1916	ENSG00000249628	LINC00942	100292680	68.9144	-6.40198	0.515468	-10.6509	1.72666e-26	6.64356e-25
1917	ENSG00000249715	FER1L5	90342	9.51081	-2.71657	0.28676	-7.80838	5.79275e-15	6.91527e-14
1918	ENSG00000249736	LINC02242	105379006	1.95954	-2.05446	0.507615	-4.05064	5.10777e-05	0.000159771
1919	ENSG00000249853	HS3ST5	222537	2.03579	-2.65148	0.637515	-3.16443	0.00155387	0.00369973
1920	ENSG00000249859	PVT1	5820	212.278	-2.32468	0.206555	-11.2526	2.24749e-29	1.14805e-27
1921	ENSG00000249948	GBA3	57733	1961.59	2.23175	0.277887	8.02874	9.84759e-16	1.27583e-14
1922	ENSG00000250033	SLC7A11-AS1	641364	4.89649	-3.45058	0.493611	-6.97462	3.06709e-12	2.63507e-11
1923	ENSG00000250133	HOXC-AS2	100874364	5.20265	-3.62938	0.498863	-7.26387	3.76158e-13	3.60566e-12
1924	ENSG00000250266	LINC01612	101928223	17.7389	2.83683	0.563977	4.99304	5.94364e-07	2.5148e-06
1925	ENSG00000250286	LOC105371824	105371824	2.56608	-2.90604	0.359298	-8.08835	6.04764e-16	8.02143e-15
1926	ENSG00000250337	PURPL	643401	71.0664	-2.32154	0.310479	-7.47479	7.73293e-14	8.03352e-13
1927	ENSG00000250420	AACSP1	729522	5.70451	-4.33797	0.61377	-5.62618	1.84245e-08	9.68728e-08
1928	ENSG00000250451	HOXC-AS1	100874363	4.35706	-4.0328	0.621692	-6.07082	1.27255e-09	7.84897e-09
1929	ENSG00000250493	LOC101929227	101929227	3.44467	-2.88717	0.51191	-5.64811	1.62218e-08	8.59755e-08
1930	ENSG00000250514	LINC02125	101928203	1.75163	-2.13687	0.594862	-3.5932	0.000326643	0.000886694
1931	ENSG00000250546	LOC101928978	101928978	1.54685	-2.40552	0.69213	-3.21286	0.0013142	0.00317467
1932	ENSG00000250579	CTD-2297D10.2	101929176	21.7748	-5.14427	0.542892	-8.95637	3.35544e-19	6.39325e-18
1933	ENSG00000250584	LINC01511	100506791	2.08977	-3.58939	0.619721	-4.34112	1.4176e-05	4.85665e-05
1934	ENSG00000250590	LINC02492	100506272	5.39556	-4.00255	0.619368	-6.46087	1.04101e-10	7.36774e-10
1935	ENSG00000250682	LINC00491	285708	5.87988	-4.1013	0.624144	-6.56944	5.05048e-11	3.72819e-10
1936	ENSG00000250696	LOC105377267	105377267	129.071	-2.42552	0.228978	-10.5895	3.33451e-26	1.24412e-24
1937	ENSG00000250708	LINC02269	101928478	2.86865	-2.80045	0.800888	-3.11989	0.0018092	0.00424967
1938	ENSG00000250846	EPHA5-AS1	100144602	1.50342	-2.25396	0.83331	-2.2721	0.0230805	0.0425304
1939	ENSG00000250863	LOC105374438	105374438	1.14788	-2.18693	0.403413	-5.4218	5.90022e-08	2.89585e-07
1940	ENSG00000251138	LOC100507377	100507377	78.2706	-7.00374	0.57138	-12.2911	1.01161e-34	7.90388e-33
1941	ENSG00000251258	RFPL4B	442247	45.0106	-6.23549	0.633838	-10.88	1.43601e-27	6.10407e-26
1942	ENSG00000251301	LINC02384	100507195	180.252	-2.07663	0.350896	-5.92113	3.1973e-09	1.86084e-08
1943	ENSG00000251350	LINC02475	100506827	26.2024	-6.01369	0.439835	-13.6709	1.51454e-42	2.0562e-40
1944	ENSG00000251381	LINC00958	100506305	7.80397	-3.88343	0.55869	-5.03145	4.86779e-07	2.08931e-06
1945	ENSG00000251450	RASGRF2-AS1	102524628	1.92119	-2.55888	0.346865	-7.3775	1.61295e-13	1.62185e-12
1946	ENSG00000251493	FOXD1	2297	3.11033	-3.0397	0.428454	-3.93818	8.21015e-05	0.000248328
1947	ENSG00000251574	LOC105379109	105379109	4.37105	-4.03011	0.474736	-8.489	2.08432e-17	3.24848e-16
1948	ENSG00000251629	LINC02241	105374676	69.1212	-7.34044	0.570865	-12.8582	7.73163e-38	7.66849e-36
1949	ENSG00000251676	SNHG27	101927305	5.32423	-3.71868	0.684119	-5.01405	5.32953e-07	2.27138e-06
1950	ENSG00000252010	SCARNA5	677775	2.38621	2.3188	0.302831	4.54104	5.59772e-06	2.04724e-05
1951	ENSG00000253123	LOC100507403	100507403	16.8207	-2.15892	0.244151	-7.97692	1.50032e-15	1.91042e-14
1952	ENSG00000253147	LOC102467222	102467222	1.41748	2.85535	0.442171	6.45618	1.07377e-10	7.58011e-10
1953	ENSG00000253199	LINC02153	286114	2.34184	2.34554	0.510428	4.5828	4.5879e-06	1.70145e-05
1954	ENSG00000253293	HOXA10	3206	108.986	-5.36525	0.377823	-14.0945	4.10281e-45	6.51088e-43
1955	ENSG00000253302	STAU2-AS1	100128126	7.57118	-2.4483	0.270464	-8.98031	2.69996e-19	5.19701e-18
1956	ENSG00000253414	LINC01605	100507420	4.9416	-2.1784	0.340766	-6.34027	2.29367e-10	1.55788e-09
1957	ENSG00000253417	LINC02159	285629	10.1736	-4.37546	0.503629	-7.95331	1.81596e-15	2.28634e-14
1958	ENSG00000253696	KBTBD11-OT1	104266957	4.47033	2.04379	0.335526	6.09255	1.11125e-09	6.91259e-09
1959	ENSG00000253868	FER1L6-AS2	157376	1.82643	-2.69383	0.642907	-3.96995	7.18883e-05	0.000219426
1960	ENSG00000253877	LINC01608	101927459	28.198	-5.53798	0.627789	-8.86787	7.45564e-19	1.36448e-17
1961	ENSG00000253898	LINC01419	103352670	381.62	-9.55269	0.593109	-16.7108	1.09282e-62	4.02272e-60
1962	ENSG00000253983	LOC105375903	105375903	2.02289	-2.1847	0.368559	-5.91013	3.41834e-09	1.9827e-08
1963	ENSG00000254101	LINC02055	107986980	38.5524	-3.15932	0.458851	-6.88769	5.67047e-12	4.73171e-11
1964	ENSG00000254233	LINC02365	105377586	149.183	-4.34258	0.395174	-10.9856	4.48401e-28	1.99634e-26
1965	ENSG00000254266	PKIA-AS1	101927003	2.13504	-3.16496	0.542683	-4.69649	2.64671e-06	1.01935e-05
1966	ENSG00000254338	MAFA-AS1	104326051	12.8207	-6.3609	0.513858	-10.2921	7.64639e-25	2.46101e-23
1967	ENSG00000254349	MIR2052HG	441355	7.4988	-4.22036	0.469905	-8.98173	2.66554e-19	5.13631e-18
1968	ENSG00000254369	HOXA-AS3	100133311	3.73031	-3.40717	0.450013	-7.57116	3.69909e-14	3.99757e-13
1969	ENSG00000254560	BBOX1-AS1	103695435	14.1579	-4.42432	0.497097	-8.66725	4.42667e-18	7.40668e-17
1970	ENSG00000254654	LINC02685	221122	3.88908	-3.21824	0.363252	-8.82611	1.08379e-18	1.94266e-17
1971	ENSG00000254656	RTL1	388015	4.52814	-6.02861	0.567588	-5.25072	1.51508e-07	7.0138e-07
1972	ENSG00000254854	LOC102724301	102724301	4.03267	-2.15663	0.313567	-6.81171	9.64459e-12	7.81416e-11
1973	ENSG00000255042	LOC441601	441601	10.2251	-4.27596	0.763623	-5.21479	1.84024e-07	8.41325e-07
1974	ENSG00000255071	SAA2-SAA4	100528017	2785.21	2.16455	0.394692	5.47729	4.31878e-08	2.15583e-07
1975	ENSG00000255120	OVOL1-AS1	101927828	10.1448	-2.53684	0.428638	-3.66511	0.000247231	0.000685534
1976	ENSG00000255298	OR8G5	219865	2.66721	-3.04707	0.630246	-4.8336	1.34085e-06	5.38483e-06
1977	ENSG00000255501	CARD18	59082	5.78832	-4.10466	0.561905	-7.30394	2.79454e-13	2.72703e-12
1978	ENSG00000255521	LOC100507144	100507144	3.58392	-2.2248	0.434233	-5.06928	3.9933e-07	1.74032e-06
1979	ENSG00000255559	ZNF252P-AS1	286103	14.8553	-2.12965	0.194372	-10.9235	8.90064e-28	3.8522e-26
1980	ENSG00000255571	MIR9-3HG	254559	42.111	-2.86294	0.322725	-5.74092	9.4164e-09	5.14652e-08
1981	ENSG00000255746	LOC102723544	102723544	26.7709	-2.29445	0.331882	-6.90417	5.0499e-12	4.24163e-11
1982	ENSG00000255772	LINC01479	101927922	0.969599	-2.17038	0.540651	-3.01537	0.00256666	0.00585405
1983	ENSG00000255794	RMST	196475	16.2583	-3.54227	0.409757	-8.55863	1.14214e-17	1.83369e-16
1984	ENSG00000256574	OR13A1	79290	2.3415	-3.26934	0.495924	-5.05376	4.33187e-07	1.87665e-06
1985	ENSG00000256732	LOC100996671	100996671	7.1264	-4.86729	0.629256	-6.12573	9.02669e-10	5.68242e-09
1986	ENSG00000256980	KHDC1L	100129128	1.28398	-2.68319	0.699078	-2.32489	0.0200781	0.0375325
1987	ENSG00000257185	LINC02293	102724890	2.0581	-2.86378	0.569708	-5.0261	5.00554e-07	2.14251e-06
1988	ENSG00000257588	LOC101927318	101927318	1.43445	-2.31624	0.549959	-3.44526	0.000570517	0.00147829
1989	ENSG00000257596	SCAT2	112935960	14.1658	-2.06081	0.220337	-9.3265	1.09425e-20	2.41928e-19
1990	ENSG00000257636	G2E3-AS1	105370431	8.71701	-4.27847	0.623908	-6.86866	6.48091e-12	5.36162e-11
1991	ENSG00000257743	MGAM2	93432	45.544	-3.05116	0.443868	-5.042	4.60682e-07	1.98646e-06
1992	ENSG00000257842	LINC02588	102725045	11.204	-4.95011	0.541754	-9.1361	6.47456e-20	1.31727e-18
1993	ENSG00000257893	LINC02404	105369900	31.4179	-5.72076	0.632833	-9.851	6.78662e-23	1.85404e-21
1994	ENSG00000258169	LINC00485	283432	2.36217	-2.33092	0.37146	-6.25912	3.8715e-10	2.55189e-09
1995	ENSG00000258240	LOC105369980	105369980	2.01422	-3.03113	0.563133	-4.66652	3.06349e-06	1.16864e-05
1996	ENSG00000258474	LINC02313	105370439	7.94495	-3.48591	0.405795	-8.46917	2.47157e-17	3.80716e-16
1997	ENSG00000258512	LINC00239	145200	12.4244	-2.20061	0.309173	-4.87628	1.08105e-06	4.40037e-06
1998	ENSG00000258525	LOC100506071	100506071	4.94893	-2.98923	0.38778	-7.64174	2.14308e-14	2.38904e-13
[truncated: 164 more rows]
