# Supplementary material for: Screening of Early Diagnostic Biomarkers and Prognostic Biomarkers for Liver Cancer Based on GEO and TCGA Databases and Studies on Pathways and Biological Functions Affecting the Survival Time of Liver Cancer
Source: Research Square preprint supplement (doi:10.21203/rs.3.rs-86072/v1), 2020-10-08
Supplement: Supplementary file 3 [file e2aca00f443aa1b7ce258210.xlsx]

## Sheet: degree_9+DESeq2=102
TABLE 2 Top 22 hub genes with degree >=5
Number	Name	Betweenness	BottleNeck	Closeness	Clustering Coefficient	Degree	DMNC	EcCentricity	EPC	MCC	MNC	Radiality	Stress
1	ESR1	2780.98	58	38.7833	0.16667	13	0.20362	0.15823	29.267	28	11	8.41601	5698
2	SPP1	1519.02	30	35.65	0.22727	12	0.25452	0.18987	28.523	35	11	8.17225	3920
3	AURKA	967.429	11	32.0262	0.4	11	0.64146	0.13562	24.932	5045	8	7.80021	1918
4	CXCL12	1415	15	32.7333	0.11111	9	0.2842	0.15823	24.104	11	4	7.99264	2458
5	FOS	617.741	17	33.3	0.30556	9	0.32073	0.15823	27.171	29	8	8.03113	1918
6	NQO1	1353	11	31.5595	0.17857	8	0.30898	0.13562	22.39	12	3	7.85152	2882
7	NUSAP1	146	2	25.7845	0.75	8	0.76834	0.11867	23.933	5041	7	7.05611	338
8	TOP2A	332.073	3	30.2762	0.78571	8	0.64146	0.13562	24.535	5042	8	7.73606	938
9	UBE2C	146.376	1	27.2512	0.75	8	0.76834	0.11867	24.358	5041	7	7.22289	264
10	AFP	281.746	4	30.05	0.33333	7	0.33284	0.15823	26.154	17	6	7.78738	770
11	DCN	303.6	3	28.55	0.28571	7	0.28529	0.15823	24.753	13	6	7.53079	782
12	EGR1	228.024	3	30.2167	0.42857	7	0.42794	0.15823	25.634	25	6	7.80021	602
13	GMNN	0	1	25.2845	1	7	0.76834	0.11867	24.182	5040	7	7.04328	0
14	PTTG1	0	1	25.2845	1	7	0.76834	0.11867	23.945	5040	7	7.04328	0
15	RRM2	0	1	25.2845	1	7	0.76834	0.11867	23.637	5040	7	7.04328	0
16	SOCS3	631.698	6	31.0595	0.09524	7	0.30779	0.13562	25.026	7	2	7.82586	1378
17	UBE2T	0	1	25.2845	1	7	0.76834	0.11867	24.048	5040	7	7.04328	0
18	CYP1A2	577	5	29.3929	0.2	6	0.30898	0.13562	19.567	7	3	7.73606	822
19	GPC3	44.4762	2	26.7	0.53333	6	0.38039	0.15823	24.616	20	6	7.36401	138
20	FOSB	35.4667	1	27.5595	0.7	5	0.45378	0.13562	24.251	18	5	7.58211	166
21	PCK1	570	5	24.2179	0.1	5	0.30779	0.11867	10.699	5	2	7.01762	1074
22	SPARCL1	18.4333	1	26.5333	0.6	5	0.38896	0.15823	24.879	14	5	7.38967	62
